# Supplementary material for: Transition metal-free cross-dehydrogenative arylation of unactivated benzylic C–H bonds
Source: Royal Society of Chemistry journal article supplement (doi:10.1039/d0cc06212j), 2020-01-01

# **Transition Metal-free Cross-Dehydrogenative Arylation of Unactivated Benzylic C–H Bonds**

Andrew R. A. Spencer, Rachel Grainger, Adyasha Panigrahi, Thomas J. Lepper,  
Katarzyna Bentkowska and Igor Larrosa\*

Department of Chemistry, School of Natural Sciences, University of Manchester, Oxford Road,  
Manchester M13 9PL, United Kingdom

## **Contents**

|                                                              |            |
|--------------------------------------------------------------|------------|
| <b>1.1 General Experimental Information</b>                  | <b>S3</b>  |
| <b>1.2 Experimental procedures and characterisation data</b> | <b>S3</b>  |
| <b>1.3 References</b>                                        | <b>S26</b> |
| <b>1.4 NMR spectral data</b>                                 | <b>S27</b> |

## 1.1 General experimental information

All solvents and reagents were purchased from commercial suppliers and used without further purification unless otherwise stated. Compound **1k** was prepared according to the procedure described by Wu and co-workers.<sup>1</sup>

Column chromatography was performed on silica gel (40-63  $\mu\text{m}$ ) unless otherwise stated.  $\text{AgNO}_3$  impregnated silica gel was prepared by absorbing a solution of  $\text{AgNO}_3$  in MeCN (10% wt of  $\text{AgNO}_3$  to silica) on silica. The MeCN was removed under reduced pressure on a rotary evaporator and the silica was further dried at 80  $^\circ\text{C}$  and  $< 1$  mbar for 1-2 h (for long term storage, silica was kept in the fridge in the absence of light). Thin layer chromatography (TLC) was carried out on pre-coated silica gel F<sub>254</sub> plates with visualization under UV light or using an aqueous basic  $\text{KMnO}_4$  solution.

Melting points (mp) are uncorrected and were obtained using a Stuart SMP11 apparatus. IR spectra were recorded using a Thermo Scientific Nicolet iS5 FTIR spectrometer and the relevant peaks are quoted in  $\text{cm}^{-1}$ . NMR data was collected on a Bruker Avance III 400 MHz or Bruker AvanceII+ 500 MHz spectrometers. Chemical shifts are given in ppm ( $\delta$ ) and are referenced to the residual  $\text{CDCl}_3$  solvent peak at 7.26 ppm ( $^1\text{H}$  NMR) and 77.16 ppm ( $^{13}\text{C}$  NMR). Conventional one-dimensional (1D)  $^1\text{H}$  NMR,  $^{19}\text{F}$  NMR, were recorded at room temperature under routine conditions. High Resolution Mass Spectra (HRMS) were performed by the School of Chemistry Mass Spectrometry Service of the University of Manchester on a Thermo Finnigan MAT95XP spectrometer.

## 1.2 Experimental procedures and characterisation data

### General experimental procedure

In an argon filled glovebox, a flame-dried crimpable glass schlenk vial (CEM Microwave Technologies, 10 mL volume) was loaded with the ethyl benzene derivative (0.4 mmol), Selectfluor<sup>®</sup> (354.3 mg, 0.8 mmol), 9-fluorenone (3.60 mg, 0.02 mmol) and MeCN (5 mL). The vial was sealed with a crimpable cap and removed from the glovebox. The reaction was allowed to stir for 24 h at room temperature and irradiated with an 18W CFL bulb. Under a positive pressure of nitrogen, arene (0.8 mmol) was added and the reaction was re-sealed and heated to 90  $^\circ\text{C}$  for 30 minutes. After cooling, the reaction mixture was filtered through a short plug of silica with acetone (3 x 15 mL). The products were purified using flash chromatography using the eluents specified.

## Glovebox free experimental procedure

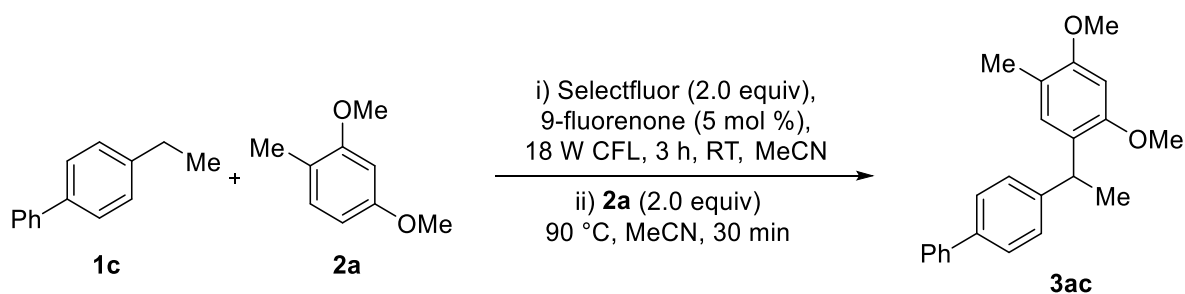

A flame-dried crimpable glass schlenk vial (CEM Microwave Technologies, 10 mL volume) was loaded with the 4-ethyl-1,1'-biphenyl **1c** (73.0 mg, 0.4 mmol), Selectfluor<sup>®</sup> (354.3 mg, 0.8 mmol) and 9-fluorenone (3.60 mg, 0.02 mmol). After evacuating and backfilling 3 times with nitrogen, MeCN that had been degassed three times by *freeze-pump-thaw* cycles (5 mL) was added. The vial was sealed with a crimpable cap and stirred for 3 h at room temperature and irradiated with an 18W CFL bulb. Under a positive pressure of nitrogen, 2,4-dimethoxytoluene **2a** (118  $\mu$ L, 0.8 mmol) was added and the reaction was re-sealed and heated to 90 °C for 30 minutes. After cooling, the reaction mixture was filtered through a short plug of silica with acetone (3 x 15 mL). A 75% yield of 4-(1-(2,4-dimethoxy-5-methylphenyl)ethyl)-1,1'-biphenyl **3ac** was determined by <sup>1</sup>H NMR spectroscopy using CH<sub>2</sub>Br<sub>2</sub> as an internal standard.

## Experimental procedure for 4 mmol scale reaction

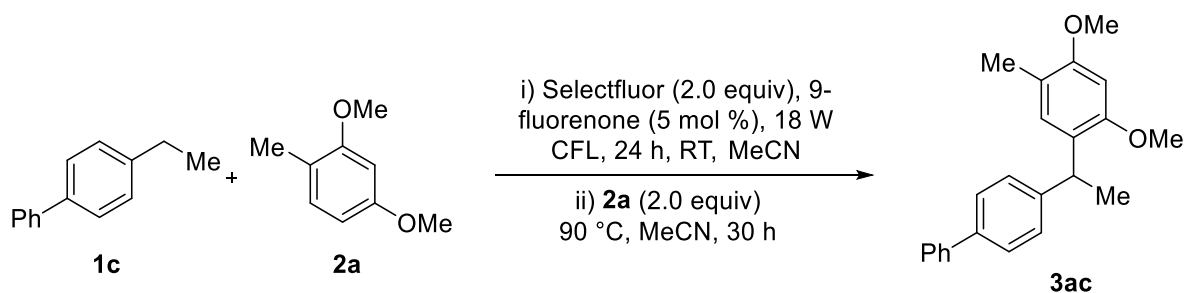

In an argon filled glovebox, a 100 mL Ace pressure tube was loaded with the 4-ethyl-1,1'-biphenyl **1c** (730 mg, 4 mmol), Selectfluor<sup>®</sup> (2.66 g, 6 mmol), 9-fluorenone (36.0 mg, 0.2 mmol) and MeCN (50 mL). The tube was sealed with a screw cap and stirred for 24 h at room temperature and irradiated with two 18W CFL bulbs. Under a stream of nitrogen, 2,4-dimethoxytoluene **2a** (1.18 mL, 8 mmol) was added and the reaction was re-sealed and heated to 90 °C for 3 h. After cooling, the reaction mixture was filtered through a short plug of silica with acetone (3 x 150 mL). The product was purified by flash chromatography with Ag-

impregnated silica using an eluent of 1% to 3% EtOAc:hexanes to afford 4-(1-(2,4-dimethoxy-5-methylphenyl)ethyl)-1,1'-biphenyl **3ac** (1.04 g, 75%) as a yellow solid.

### Preparation of (1-fluoroethyl)benzene **4a**

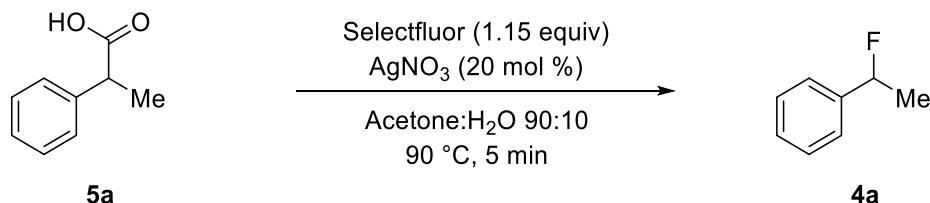

Selectfluor (2.14 g, 5.75 mmol) and a phenylpropanoic acid (0.704 mL, 5 mmol) were weighed into a crimp cap vial and dissolved in a 90:10 solution of acetone:H<sub>2</sub>O (37.5 mL:4.2 mL). AgNO<sub>3</sub> (0.170 g, 1 mmol) was added and the reaction vessel quickly sealed, covered in foil and stirred in an oil bath for 5 minutes at 90 °C. After this time, the reaction vessel was rapidly cooled in an ice bath and quenched with 1 M HCl to precipitate out AgCl. The reaction mixture diluted in DCM and basified with saturated K<sub>2</sub>CO<sub>3</sub> solution. The organic layer was separated and the aqueous layer extracted DCM (20 mL x 2). The combined organic layers were washed with brine, dried over MgSO<sub>4</sub>, filtered and concentrated *in vacuo*. The product was purified by column chromatography using an eluent of pentane to afford (1-fluoroethyl)benzene **4a** as a clear oil (0.520 g, 84%).

<sup>1</sup>H NMR (400 MHz, CDCl<sub>3</sub>) δ, ppm: 7.47–7.30 (m, 5H), 5.64 (dq, *J* = 47.7, 6.4 Hz, 1H), 1.66 (dd, *J* = 23.9, 6.4 Hz, 3H).

<sup>13</sup>C NMR (101 MHz, CDCl<sub>3</sub>) δ, ppm: 141.6 (d, *J* = 19.5 Hz), 128.6, 128.3 (d, *J* = 2.0 Hz), 125.4 (d, *J* = 6.7 Hz), 91.1 (d, *J* = 166.9 Hz), 23.1 (d, *J* = 25.3 Hz).

<sup>19</sup>F NMR (376 MHz, CDCl<sub>3</sub>) δ, ppm: -167.1.

Spectroscopic data was in agreement with literature values.<sup>2</sup>

### Procedure for the mechanistic experiments

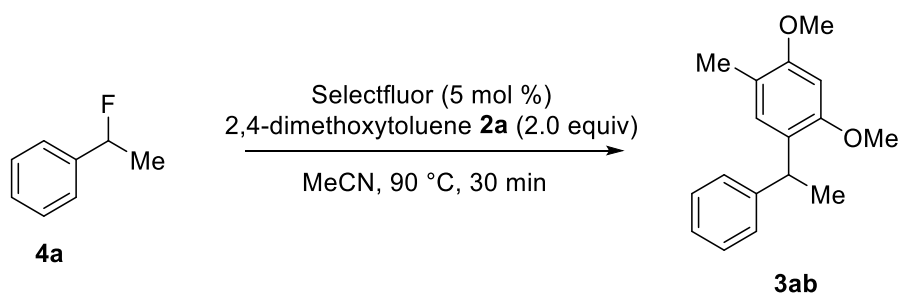

Selectfluor (1.77mg, 0.005 mmol) or HF (4.00  $\mu$ L, 0.005 mmol) and 2,4-dimethoxytoluene (35.4  $\mu$ L, 0.2 mmol) were weighed into an oven dried 10 mL crimp cap vial and purged with nitrogen. A solution of (1-fluoroethyl)benzene **41** (0.2 mmol) in dry MeCN was added, the overall concentration was adjusted to 0.08 M with additional dry MeCN. The vial sealed and heated to 90  $^{\circ}$ C for 30 min. After 30 min the reaction vessel was cooled in an ice bath then diluted with Et<sub>2</sub>O (5 mL), the crude reaction mixture was filtered through a short plug of silica washing with acetone (3 x 5 mL) and concentrated *in vacuo*. The yield was determined by <sup>1</sup>H NMR using CH<sub>2</sub>Br<sub>2</sub> as an internal standard.

### 1-(1-(3-(tert-butyl)phenyl)ethyl)-2,4-dimethoxy-5-methylbenzene

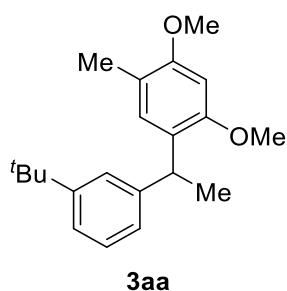

Following the general procedure, 1-*tert*-butyl-3-ethylbenzene **1a** (76.0  $\mu$ L, 0.4 mmol) was irradiated for 24 h then 2,4-dimethoxytoluene **2a** (118  $\mu$ L, 1.2 mmol) was added. The product was purified by column chromatography using an eluent of 4% to 6% Et<sub>2</sub>O:hexanes to afford 1-(1-(3-(tert-butyl)phenyl)ethyl)-2,4-dimethoxy-5-methylbenzene **3aa** (89.0 mg, 71%) as a yellow solid.

**m. p.** = 42–44 $^{\circ}$ C

**<sup>1</sup>H NMR** (400 MHz, CDCl<sub>3</sub>)  $\delta$ , ppm: 7.37 (s, 1H), 7.25–7.19 (m, 2H), 7.10–7.04 (m, 1H), 6.93 (s, 1H), 6.45 (s, 1H), 4.51 (q, *J* = 7.3 Hz, 1H), 3.85 (s, 3H), 3.80 (s, 3H), 2.16 (s, 3H), 1.60 (d, *J* = 7.3 Hz, 3H), 1.34 (s, 9H).

**<sup>13</sup>C NMR** (101 MHz, CDCl<sub>3</sub>)  $\delta$ , ppm: 156.6, 155.8, 150.7, 146.4, 129.5, 127.8, 126.8, 125.1, 124.7, 122.6, 118.0, 95.7, 56.1, 55.7, 37.2, 34.8, 31.6, 21.3, 15.7.

**HRMS** *m/z* calculated for C<sub>21</sub>H<sub>28</sub>O<sub>2</sub>Na, 335.1982, found: 335.1974.

**IR** (ATR),  $\nu$ , cm<sup>-1</sup>: 1298, 1204, 1039, 707, 611, 592, 588, 576, 569.

### 2-(1-(3-(tert-butyl)phenyl)ethyl)-1,4-dimethoxybenzene

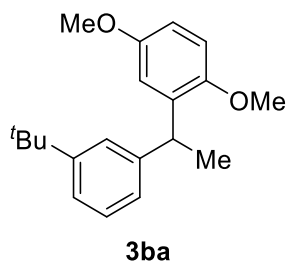

Following the general procedure, 1-*tert*-butyl-3-ethylbenzene **1a** (76.0  $\mu$ L, 0.4 mmol) was irradiated for 24 h then 1,4-dimethoxybenzene **2b** (221 mg, 1.6 mmol) was added. The product was purified by flash chromatography using an eluent of 2% diisopropyl ether:hexanes to afford 2-(1-(3-(*tert*-butyl)phenyl)ethyl)-1,4-dimethoxybenzene **3ba** (47.8 mg, 40%) as a clear oil.

<sup>1</sup>H NMR (400 MHz, CDCl<sub>3</sub>)  $\delta$ , ppm: 7.32 (d,  $J$  = 1.9 Hz, 1H), 7.19 (d,  $J$  = 5.4 Hz, 2H), 7.04 (td,  $J$  = 4.6, 1.8 Hz, 1H), 6.80–6.73 (m, 2H), 6.68 (dd,  $J$  = 8.8, 3.1 Hz, 1H), 4.54 (q,  $J$  = 7.3 Hz, 1H), 3.73 (s, 3H), 3.73 (s, 3H), 1.57 (d,  $J$  = 7.2 Hz, 3H), 1.30 (s, 9H).

<sup>13</sup>C NMR (101 MHz, CDCl<sub>3</sub>)  $\delta$ , ppm: 153.7, 151.4, 150.9, 145.6, 136.8, 127.9, 125.2, 124.8, 122.8, 114.8, 111.8, 110.6, 56.3, 55.8, 38.0, 34.8, 31.6, 21.0.

HRMS  $m/z$  calculated for C<sub>20</sub>H<sub>27</sub>O<sub>2</sub>, 299.2006, found: 299.2006.

IR (ATR),  $\nu$ , cm<sup>-1</sup>: 1492, 1462, 1214, 1044, 1026, 795, 706.

### 2-(1-(3-(*tert*-butyl)phenyl)ethyl)-1-methoxy-4-methylbenzene

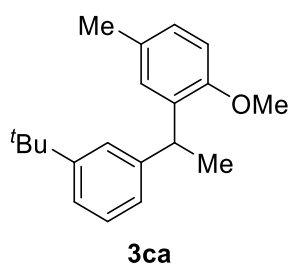

Following the general procedure, 1-*tert*-butyl-3-ethylbenzene **1a** (19.0  $\mu$ L, 0.1 mmol) was irradiated for 24 h then 1-methoxy-4-methylbenzene **2c** (50.0  $\mu$ L, 0.4 mmol) was added. The product was purified by preparative thin layer chromatography using an eluent of 100% hexanes to afford 2-(1-(3-(*tert*-butyl)phenyl)ethyl)-1-methoxy-4-methylbenzene **3ca** (13.5 mg, 48%) as a clear oil.

**<sup>1</sup>H NMR** (400 MHz, CDCl<sub>3</sub>) δ 7.33 (dt, *J* = 2.2, 1.1 Hz, 1H), 7.22–7.16 (m, 2H), 7.04 (td, *J* = 4.6, 1.8 Hz, 1H), 6.98–6.92 (m, 2H), 6.75–7.73 (m, 1H), 4.53 (q, *J* = 7.3 Hz, 1H), 3.75 (s, 3H), 2.25 (s, 3H), 1.57 (d, *J* = 7.2 Hz, 3H), 1.30 (s, 9H).

**<sup>13</sup>C NMR** (126 MHz, CDCl<sub>3</sub>) δ 154.9, 150.8, 146.0, 135.1, 129.7, 128.5, 127.8, 127.3, 125.3, 124.8, 122.7, 110.8, 55.8, 37.7, 34.8, 31.6, 21.1, 20.9.

**HRMS** *m/z* calculated for C<sub>20</sub>H<sub>26</sub>O, 282.1978, found: 282.1980.

**IR** (ATR), ν, cm<sup>-1</sup>: 1492, 1462, 1277, 1214, 1177, 1044, 1026, 795, 705.

#### 4-(1-(3-(tert-butyl)phenyl)ethyl)-2-methylphenol

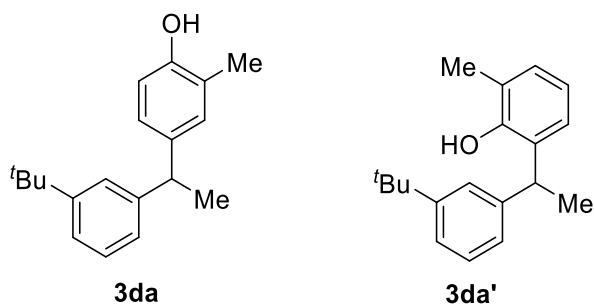

Following the general procedure, 1-*tert*-butyl-3-ethylbenzene **1a** (76.0 μL, 0.4 mmol) was irradiated for 24 h then 2-methylphenol **2d** (124 μL, 1.2 mmol) was added. The product was purified by flash chromatography using an eluent of 0% to 5% EtOAc:hexanes to afford 4-(1-(3-(tert-butyl)phenyl)ethyl)-2-methylphenol **3da** (61.2 mg, 57%) as a red oil. (12% of other regioisomer **3da'** determined by NMR).

**<sup>1</sup>H NMR** (400 MHz, CDCl<sub>3</sub>) δ, ppm: 7.29 (s, 1H), 7.25–7.21 (m, 2H), 7.08–6.98 (m, 2H), 6.95 (dd, *J* = 8.2, 2.3 Hz, 1H), 6.70 (d, *J* = 8.2 Hz, 1H), 4.08 (q, *J* = 7.2 Hz, 1H), 2.23 (s, 3H), 1.62 (d, *J* = 7.2 Hz, 3H), 1.33 (s, 9H).

**<sup>13</sup>C NMR** (101 MHz, CDCl<sub>3</sub>) δ, ppm: 152.0, 151.1, 146.5, 139.0, 130.4, 128.1, 126.1, 124.8, 124.7, 123.5, 123.0, 114.8, 44.4, 34.8, 31.6, 22.5, 16.0.

**HRMS** *m/z* calculated for C<sub>19</sub>H<sub>23</sub>O, 367.1754, found: 367.1748.

**IR** (ATR), ν, cm<sup>-1</sup>: 1505, 1262, 1113, 818, 795, 706.

#### 4-(1-(3-(tert-butyl)phenyl)ethyl)benzene-1,3-diol



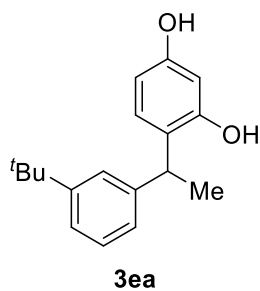

Following the general procedure, 1-*tert*-butyl-3-ethylbenzene **1a** (76.0  $\mu$ L, 0.4 mmol) was irradiated for 24 h then resorcinol **2e** (88.0 mg, 0.8 mmol) was added. The product was purified by flash chromatography using an eluent of 0% to 20% EtOAc:hexanes to afford 4-(1-(3-(*tert*-butyl)phenyl)ethyl)benzene-1,3-diol **3ea** (65.0 mg, 60%) as a yellow oil.

**$^1\text{H}$  NMR** (400 MHz,  $\text{CDCl}_3$ )  $\delta$  7.32 (d,  $J = 2.1$  Hz, 1H), 7.30–7.21 (m, 2H), 7.12 (d,  $J = 8.3$  Hz, 1H), 7.04 (dt,  $J = 6.3, 2.1$  Hz, 1H), 6.44 (dd,  $J = 8.3, 2.5$  Hz, 1H), 6.31 (d,  $J = 2.6$  Hz, 1H), 4.68 (s, 2H), 4.24 (q,  $J = 7.2$  Hz, 1H), 1.62 (d,  $J = 7.2$  Hz, 3H), 1.31 (s, 9H).

**$^{13}\text{C}$  NMR** (101 MHz,  $\text{CDCl}_3$ )  $\delta$  155.1, 154.5, 151.7, 144.9, 128.6, 128.5, 124.5, 124.4, 123.6, 107.6, 103.6, 38.8, 34.7, 31.4, 21.4.

**HRMS**  $m/z$  calculated for  $\text{C}_{18}\text{H}_{21}\text{O}_2$ , 269.1547, found: 269.1540.

**IR** (ATR),  $\nu$ ,  $\text{cm}^{-1}$ : 1602, 1451, 1201, 1159, 1108, 971, 836, 797, 706, 628.

### 6-(1-(3-(*tert*-Butyl)phenyl)ethyl)benzo[*d*][1,3]dioxol-5-ol

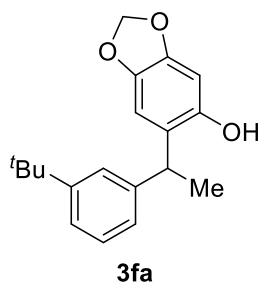

Following the general procedure, 1-*tert*-butyl-3-ethylbenzene **1a** (76.0  $\mu$ L, 0.4 mmol) was irradiated for 24 h then benzo[*d*][1,3]dioxol-5-ol **2f** (110.5  $\mu$ L, 0.8 mmol) was added. The product was purified by flash chromatography using an eluent of 97:2:1 hexanes:EtOAc:acetic acid to afford 6-(1-(3-(*tert*-Butyl)phenyl)ethyl)benzo[*d*][1,3]dioxol-5-ol **3fa** (82.7 mg, 69%) as a brown oil.

**<sup>1</sup>H NMR** (400 MHz, CDCl<sub>3</sub>) δ, ppm: 7.36–7.33 (m, 1H), 7.30–7.21 (m, 2H), 7.05 (dt, *J* = 6.4, 1.9 Hz, 1H), 6.75 (s, 1H), 6.36 (s, 1H), 5.87 (s, 2H), 4.77 (s, 1H), 4.30 (q, *J* = 7.3 Hz, 1H), 1.60 (d, *J* = 7.2 Hz, 3H), 1.32 (s, 9H).

**<sup>13</sup>C NMR** (101 MHz, CDCl<sub>3</sub>): δ, ppm: 151.7, 147.8, 146.2, 145.0, 141.6, 128.5, 124.5, 124.5, 123.6, 107.4, 101.0, 98.9, 38.8, 34.8, 31.5, 21.4.

**HRMS** *m/z* calculated for C<sub>19</sub>H<sub>21</sub>O<sub>3</sub>, 297.1496, found: 297.1494.

**IR** (ATR), ν, cm<sup>-1</sup>: 1482, 1261, 1224, 1167, 1037, 909, 797, 731, 705.

#### 4-allyl-5-(1-(3-(tert-butyl)phenyl)ethyl)-2-methoxyphenol

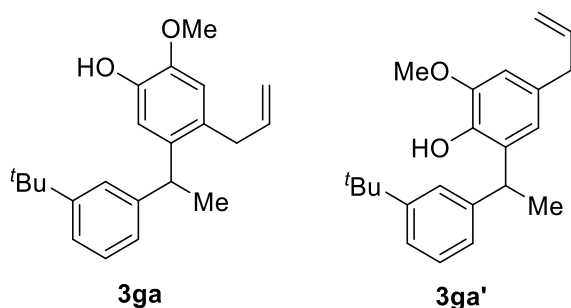

Following the general procedure, 1-*tert*-butyl-3-ethylbenzene **1a** (76.0 μL, 0.4 mmol) was irradiated for 24 h then 4-allyl-2-methoxyphenol **2g** (124.0 μL, 0.8 mmol) was added. The product was purified by flash chromatography using an eluent of 2% to 4% EtOAc:hexanes to afford 4-allyl-5-(1-(3-(tert-butyl)phenyl)ethyl)-2-methoxyphenol **3ga** (70.2 mg, 54%) as a light brown oil. (17% of minor isomer **3ga'** determined by <sup>1</sup>H NMR).

**<sup>1</sup>H NMR** (400 MHz, CDCl<sub>3</sub>) δ 7.25–7.21 (m, 1H), 7.20–7.16 (m, 2H), 6.96 (ddd, *J* = 6.6, 3.6, 1.8 Hz, 1H), 6.85 (s, 1H), 6.64 (s, 1H), 5.88 (ddt, *J* = 16.6, 10.1, 6.2 Hz, 1H), 5.43 (s, 1H), 5.10–4.88 (m, 2H), 4.28 (q, *J* = 7.2 Hz, 1H), 3.86 (s, 3H), 3.36 (dt, *J* = 15.8, 1.6 Hz, 1H), 3.27 (dt, *J* = 16.1, 1.5 Hz, 1H), 1.55 (d, *J* = 7.1 Hz, 3H), 1.29 (s, 9H).

**<sup>13</sup>C NMR** (101 MHz, CDCl<sub>3</sub>) δ, ppm: 151.1, 146.1, 144.7, 144.0, 137.9, 137.6, 129.0, 128.1, 124.9, 124.7, 122.8, 115.5, 113.8, 112.4, 56.1, 40.1, 36.9, 34.8, 31.5, 22.6.

**HRMS** *m/z* calculated for C<sub>22</sub>H<sub>29</sub>O<sub>2</sub>, 325.2162, found: 325.2162.

**IR** (ATR), ν, cm<sup>-1</sup>: 1508, 1271, 1204, 1093, 878, 795, 706.

#### 3-(1-(3-(tert-butyl)phenyl)ethyl)-2-methylbenzo[*b*]thiophene

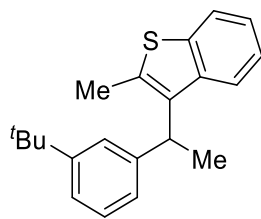

**3ha**

Following the general procedure, 1-*tert*-butyl-3-ethylbenzene **1a** (76.0  $\mu$ L, 0.4 mmol) was irradiated for 24 h then 2-methylbenzo[*b*]thiophene **2h** (119 mg, 0.8 mmol) was added. The product was purified by preparative TLC using an eluent of 100% hexanes to afford 3-(1-(3-(*tert*-butyl)phenyl)ethyl)-2-methylbenzo[*b*]thiophene **3ha** (80.0 mg, 65%) as a yellow oil.

**$^1\text{H}$  NMR** (400 MHz,  $\text{CDCl}_3$ ):  $\delta$ , ppm: 7.62 (dt,  $J = 7.1, 1.8$  Hz, 1H), 7.36 (dt,  $J = 7.2, 1.2$  Hz, 1H), 7.14–7.03 (m, 5H), 6.97 (d,  $J = 6.8$  Hz, 1H), 4.55 (q,  $J = 7.3$  Hz, 1H), 2.32 (s, 3H), 1.66 (d,  $J = 7.4$  Hz, 3H), 1.17 (s, 9H).

**$^{13}\text{C}$  NMR** (101 MHz,  $\text{CDCl}_3$ ):  $\delta$ , ppm: 151.1, 143.6, 139.8, 138.5, 135.3, 134.7, 128.0, 124.7, 124.0, 123.6, 122.9, 122.5, 122.1, 121.8, 36.8, 34.8, 31.5, 18.8, 14.6.

**HRMS**  $m/z$  calculated for  $\text{C}_{21}\text{H}_{25}\text{S}$ , 309.1671, found: 309.1674.

**IR** (ATR),  $\nu$ ,  $\text{cm}^{-1}$ : 1456, 1433, 761, 730, 706.

### 2-(1-(3-(*tert*-butyl)phenyl)ethyl)-3-methylbenzo[*b*]thiophene

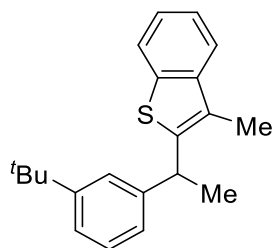

**3ia**

Following the general procedure, 1-*tert*-butyl-3-ethylbenzene **1a** (76.0  $\mu$ L, 0.4 mmol) was irradiated for 24 h then 3-methylbenzo[*b*]thiophene **2i** (107  $\mu$ L, 0.8 mmol) was added. The product was purified by flash chromatography using an eluent of 100% hexanes to afford 2-(1-(3-(*tert*-butyl)phenyl)ethyl)-3-methylbenzo[*b*]thiophene **3ia** (57.2 mg, 46%) as a yellow oil.

**$^1\text{H}$  NMR** (400 MHz,  $\text{CDCl}_3$ )  $\delta$ , ppm: 7.84 (dd,  $J = 8.0, 2.8$  Hz, 1H), 7.70 (dd,  $J = 8.3, 2.6$  Hz, 1H), 7.51–7.46 (m, 1H), 7.42 (tdd,  $J = 8.0, 2.7, 1.2$  Hz, 1H), 7.34 (dddt,  $J = 7.2, 4.5, 3.1, 1.5$

Hz, 3H), 7.23 (d, 1H), 4.68 (q,  $J = 7.2$  Hz, 1H), 2.43 (s, 3H), 1.84 (d,  $J = 7.2$  Hz, 3H), 1.41 (s, 9H).

$^{13}\text{C}$  NMR (101 MHz,  $\text{CDCl}_3$ ):  $\delta$ , ppm: 151.4, 145.0, 144.7, 141.1, 138.3, 128.3, 126.3, 124.5, 124.4, 123.9, 123.6, 123.5, 122.4, 121.4, 39.5, 34.8, 31.5, 23.0, 12.0.

HRMS  $m/z$  calculated for  $\text{C}_{21}\text{H}_{25}\text{S}$ , 309.1671, found: 309.1675.

IR (ATR),  $\nu$ ,  $\text{cm}^{-1}$ : 1459, 1435, 794, 752, 737, 706.

### methyl 3-(1-(3-(tert-butyl)phenyl)ethyl)-1H-indole-6-carboxylate

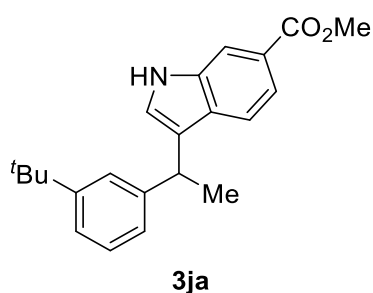

Following the general procedure, 1-*tert*-butyl-3-ethylbenzene **1a** (76.0  $\mu\text{L}$ , 0.4 mmol) was irradiated for 24 h then methyl 1H-indole-6-carboxylate **2j** (140 mg, 0.8 mmol) was added. The product was purified by flash chromatography using an eluent of 40% to 60% DCM:hexanes to afford methyl 3-(1-(3-(tert-butyl)phenyl)ethyl)-1H-indole-6-carboxylate **3ja** (70.2 mg, 52%) as an off white solid.

**m. p.** = 126–128°C

$^1\text{H}$  NMR (400 MHz,  $\text{CDCl}_3$ )  $\delta$ , ppm: 8.35 (s, 1H), 8.12 (s, 1H), 7.72 (dd,  $J = 8.4, 1.5$  Hz, 1H), 7.42 (d,  $J = 8.4$  Hz, 1H), 7.37 (s, 1H), 7.23–7.20 (m, 2H), 7.15 (s, 1H), 7.07 (d,  $J = 6.6$  Hz, 1H), 4.39 (q,  $J = 7.1$  Hz, 1H), 3.93 (s, 3H), 1.73 (d,  $J = 7.1$  Hz, 3H), 1.31 (s, 9H).

$^{13}\text{C}$  NMR (101 MHz,  $\text{CDCl}_3$ )  $\delta$ , ppm: 168.4, 151.2, 146.0, 136.0, 130.6, 128.1, 124.8, 124.7, 124.4, 123.6, 123.1, 122.3, 120.3, 119.4, 113.6, 52.1, 37.2, 34.8, 31.5, 22.5.

HRMS  $m/z$  calculated for  $\text{C}_{22}\text{H}_{25}\text{O}_2\text{NNa}$ , 358.1778, found: 358.1770.

IR (ATR),  $\nu$ ,  $\text{cm}^{-1}$ : 1689, 1319, 1272, 1210, 775, 707.

### 3-(1-(3-(tert-butyl)phenyl)ethyl)-1H-indole-6-carboxylic acid

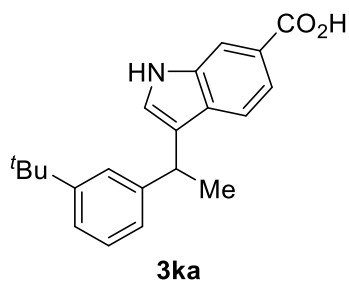

Following the general procedure, 1-*tert*-butyl-3-ethylbenzene **1a** (76.0  $\mu$ L, 0.4 mmol) was irradiated for 24 h then 1H-indole-6-carboxylic acid **2k** (193 mg, 1.2 mmol) was added. The product was purified by flash chromatography using an eluent of 89:10:1 Hexane:EtOAc:AcOH to afford methyl 3-(1-(3-(*tert*-butyl)phenyl)ethyl)-1H-indole-6-carboxylic acid **3ka** (70.7 mg, 55%) as an off white solid.

**m. p.** = 201–204°C

**<sup>1</sup>H NMR** (400 MHz, DMSO-*d*<sub>6</sub>)  $\delta$ , ppm: 12.43 (s, 1H), 11.22 (s, 1H), 7.97 (d, *J* = 1.4 Hz, 1H), 7.51–7.43 (m, 2H), 7.38 (d, *J* = 9.4 Hz, 2H), 7.17–7.13 (m, 2H), 7.09–7.02 (m, 1H), 4.34 (q, *J* = 7.1 Hz, 1H), 1.64 (d, *J* = 7.1 Hz, 3H), 1.24 (s, 9H).

**<sup>13</sup>C NMR** (101 MHz, DMSO-*d*<sub>6</sub>)  $\delta$ , ppm: 168.4, 150.4, 146.5, 135.7, 129.6, 127.9, 125.4, 124.1, 124.2, 123.1, 122.5, 120.3, 119.1, 118.4, 113.5, 36.4, 34.3, 31.2, 22.3.

**HRMS** *m/z* calculated for C<sub>21</sub>H<sub>22</sub>O<sub>2</sub>N, 320.1656, found: 320.1652.

**IR** (ATR),  $\nu$ , cm<sup>-1</sup>: 1671, 1318, 1281, 1257, 1233, 772, 746, 723, 706.

### 3-(1-(3-(*tert*-butyl)phenyl)ethyl)-6-nitro-1H-indole

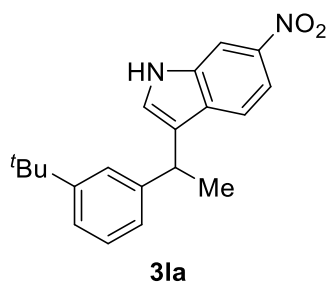

Following the general procedure, 1-*tert*-butyl-3-ethylbenzene **1a** (76.0  $\mu$ L, 0.4 mmol) was irradiated for 24 h then 6-nitro-1H-indole **2l** (130 mg, 0.8 mmol) was added. The product was purified by flash chromatography using an eluent of 0% to 11% EtOAc:hexanes to afford 3-(1-(3-(*tert*-butyl)phenyl)ethyl)-6-nitro-1H-indole **3la** (78.8 mg, 61%) as a yellow solid.

**m. p.** = 194–197°C

**<sup>1</sup>H NMR** (400 MHz, DMSO-*d*<sub>6</sub>) δ, ppm: 11.65 (s, 1H), 8.28 (d, *J* = 2.1 Hz, 1H), 7.77 (dd, *J* = 8.8, 2.1 Hz, 1H), 7.71 (s, 1H), 7.48 (d, *J* = 8.8 Hz, 1H), 7.39 (s, 1H), 7.20–7.12 (m, 2H), 7.09–7.02 (m, 1H), 4.38 (q, *J* = 7.2 Hz, 1H), 1.65 (d, *J* = 7.2 Hz, 3H), 1.24 (s, 9H).

**<sup>13</sup>C NMR** (101 MHz, DMSO-*d*<sub>6</sub>) δ, ppm: 150.5, 146.1, 141.7, 134.8, 131.0, 129.0, 128.0, 124.1, 124.0, 122.7, 121.2, 119.0, 113.3, 108.2, 36.1, 34.3, 31.2, 22.3.

**HRMS** *m/z* calculated for C<sub>20</sub>H<sub>21</sub>O<sub>2</sub>N<sub>2</sub>, 321.1609, found: 321.1605.

**IR** (ATR), ν, cm<sup>-1</sup>: 1502, 1324, 1298, 1067, 1058, 803, 735, 710, 686.

### 1,5-dimethoxy-2-methyl-4-(1-phenylethyl)benzene

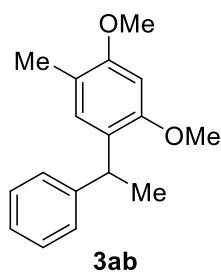

Following the general procedure, ethyl benzene **1b** (49.0 μL, 0.4 mmol) was irradiated for 48 h then 2,4-dimethoxytoluene **2a** (118 μL, 0.8 mmol) was added. The product was purified by flash chromatography using an eluent of 0% to 8% EtOAc:hexanes to afford 1,5-dimethoxy-2-methyl-4-(1-phenylethyl)benzene **3ab** (69.7 mg, 68%) as a white solid .

**m. p.** = 101–104°C

**<sup>1</sup>H NMR** (400 MHz, CDCl<sub>3</sub>) δ, ppm: 7.29–7.24 (m, 4H), 7.20–7.11 (m, 1H), 6.91 (s, 1H), 6.43 (s, 1H), 4.50 (q, *J* = 7.3 Hz, 1H), 3.83 (s, 3H), 3.78 (s, 3H), 2.14 (s, 3H), 1.57 (d, *J* = 7.3 Hz, 3H).

**<sup>13</sup>C NMR** (101 MHz, CDCl<sub>3</sub>) δ, ppm: 156.7, 155.8, 147.1, 129.6, 128.2, 127.7, 126.5, 125.7, 118.1, 95.7, 56.1, 55.7, 36.9, 21.2, 15.7.

**HRMS** *m/z* calculated for C<sub>17</sub>H<sub>20</sub>O<sub>2</sub>Na, 279.1356, found: 279.1347.

**IR** (ATR), ν, cm<sup>-1</sup>: 1509, 1297, 1204, 1117, 1036, 814, 698.

### 4-(1-(2,4-dimethoxy-5-methylphenyl)ethyl)-1,1'-biphenyl

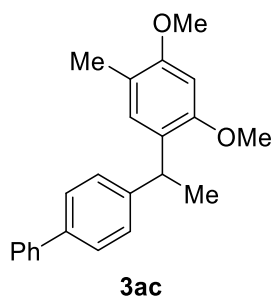

Following the general procedure, 4-ethyl-1,1'-biphenyl **1c** (73.0 mg, 0.4 mmol) was irradiated for 3 h then 2,4-dimethoxytoluene **2a** (118  $\mu$ L, 0.8 mmol) was added. The product was purified by flash chromatography using an eluent of 1% to 3% EtOAc:hexanes to afford 4-(1-(2,4-dimethoxy-5-methylphenyl)ethyl)-1,1'-biphenyl **3ac** (103.1 mg, 78%) as a yellow solid.

**m. p.** = 54–56°C

**<sup>1</sup>H NMR** (400 MHz, CDCl<sub>3</sub>)  $\delta$ , ppm: 7.64–7.60 (d,  $J$  = 8.3 Hz, 2H), 7.55 (d,  $J$  = 8.3 Hz, 2H), 7.45 (t,  $J$  = 6.9 Hz, 2H), 7.40–7.30 (m, 3H), 7.00 (s, 1H), 6.48 (s, 1H), 4.59 (q,  $J$  = 7.3 Hz, 1H), 3.86 (s, 3H), 3.83 (s, 3H), 2.20 (s, 3H), 1.65 (d,  $J$  = 7.3 Hz, 3H).

**<sup>13</sup>C NMR** (101 MHz, CDCl<sub>3</sub>)  $\delta$ , ppm: 156.7, 155.8, 146.2, 141.3, 138.5, 129.5, 128.8, 128.1, 127.1, 127.0, 126.9, 126.3, 118.1, 95.6, 56.1, 55.6, 36.6, 21.2, 15.7.

**HRMS**  $m/z$  calculated for C<sub>23</sub>H<sub>24</sub>O<sub>2</sub>, 332.1771, found: 332.1774.

**IR** (ATR),  $\nu$ , cm<sup>-1</sup>: 1295, 1203, 1106, 1037, 846, 760, 742, 693.

### 1-(1-(4-fluorophenyl)ethyl)-2,4-dimethoxy-5-methylbenzene

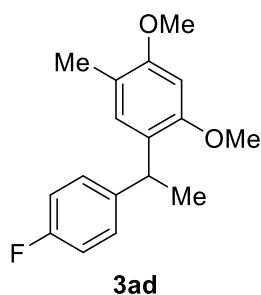

Following the general procedure, 1-ethyl-4-fluorobenzene **1d** (51.0  $\mu$ L, 0.4 mmol) was irradiated for 24 h then 2,4-dimethoxytoluene **2a** (118  $\mu$ L, 0.8 mmol) was added. The product was purified by flash chromatography using an eluent of 1% to 8% EtOAc:hexanes to afford 1-(1-(4-fluorophenyl)ethyl)-2,4-dimethoxy-5-methylbenzene **3ad** (84.0 mg, 77%) as a yellow solid.

**m. p.** = 46–48°C

**<sup>1</sup>H NMR** (400 MHz, CDCl<sub>3</sub>) δ, ppm: 7.25–7.18 (m, 2H), 6.96 (t, *J* = 8.8 Hz, 2H), 6.91 (s, 1H), 6.45 (s, 1H), 4.48 (q, *J* = 7.3 Hz, 1H), 3.85 (s, 3H), 3.79 (s, 3H), 2.16 (s, 3H), 1.57 (d, *J* = 7.3 Hz, 3H).

**<sup>13</sup>C NMR** (101 MHz, CDCl<sub>3</sub>) δ, ppm: 161.4 (d, *J* = 242.9 Hz), 157.1, 156.1, 142.7 (d, *J* = 3.0 Hz), 129.7, 129.3 (d, *J* = 7.6 Hz), 126.5, 118.4, 115.1 (d, *J* = 21.0 Hz), 95.9, 56.3, 55.9, 36.6, 21.6, 16.0.

**<sup>19</sup>F NMR** (376 MHz, CDCl<sub>3</sub>) δ –118.28 (tt, *J* = 8.9, 5.5 Hz).

**HRMS** *m/z* calculated for C<sub>17</sub>H<sub>19</sub>O<sub>2</sub>F, 274.1364, found: 274.1367.-

**IR** (ATR), ν, cm<sup>-1</sup>: 1505, 1300, 1205, 1190, 1120, 1037, 834, 821, 812.

#### 4-(1-(2,4-dimethoxy-5-methylphenyl)ethyl)phenyl acetate

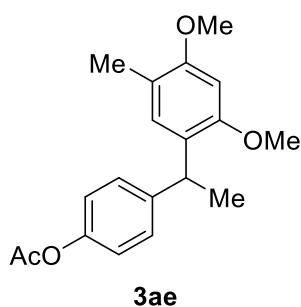

Following the general procedure, 4-ethylphenyl acetate **1e** (63.8 μL, 0.4 mmol) was irradiated for 24 h using 15 mol % 9-fluorenone then 2,4-dimethoxytoluene **2a** (118 μL, 0.8 mmol) was added and the reaction was heated to 90 °C for 3 hours. The product was purified by flash chromatography using an eluent of 3% to 5% EtOAc:hexanes to afford 4-(1-(2,4-dimethoxy-5-methylphenyl)ethyl)phenyl acetate **3ae** (59.2 mg, 47%) as a yellow solid.

**m. p.** = 63–64°C

**<sup>1</sup>H NMR** (400 MHz, CDCl<sub>3</sub>) δ, ppm: 7.23 (d, *J* = 8.6 Hz, 2H), 6.97 (d, *J* = 8.6 Hz, 2H), 6.89 (s, 1H), 6.42 (s, 1H), 4.47 (q, *J* = 7.3 Hz, 1H), 3.82 (s, 3H), 3.76 (s, 3H), 2.28 (s, 3H), 2.13 (s, 3H), 1.55 (d, *J* = 7.3 Hz, 3H).

**<sup>13</sup>C NMR** (101 MHz, CDCl<sub>3</sub>) δ, ppm: 169.8, 156.7, 155.8, 148.6, 144.6, 129.5, 128.6, 126.1, 121.1, 118.1, 95.6, 56.0, 55.7, 36.4, 21.3, 21.2, 15.6.



**HRMS**  $m/z$  calculated for  $C_{19}H_{22}O_4Na$ , 337.1410, found: 237.1397.

**IR** (ATR),  $\nu$ ,  $cm^{-1}$ : 1754, 1505, 1293, 1216, 1196, 1162, 1115, 1034, 1018, 912, 845, 836, 831.

**1-(1-(2-chlorophenyl)ethyl)-2,4-dimethoxy-5-methylbenzene**

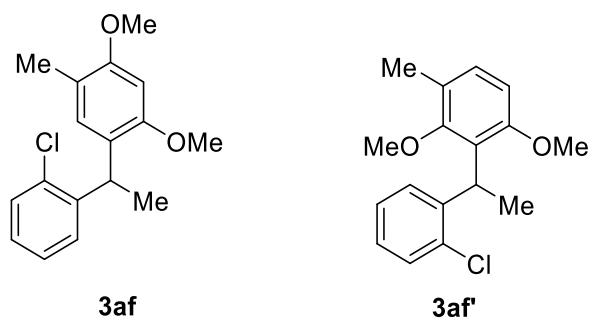

Following the general procedure, 1-chloro-2-ethylbenzene **1e** (56.2 mg, 0.4 mmol) was irradiated for 24 h then 2,4-dimethoxytoluene **2a** (283  $\mu$ L, 2.0 mmol) was added and the reaction was heated to 90 °C for 16 hours. The product was purified by flash chromatography using an eluent of 1% to 5% EtOAc:hexanes to afford 1-(1-(2-chlorophenyl)ethyl)-2,4-dimethoxy-5-methylbenzene as a mixture of isomers **3af** and **3af'** (59.2 mg, 51% (r.r = 6.3:1)) as an orange solid.

**m. p.** = 98–102°C

**$^1H$  NMR** (400 MHz,  $CDCl_3$ )  $\delta$ , ppm: 7.56 (dd,  $J = 7.9, 1.7$  Hz, 1H Minor), 7.36–7.31 (m, 1H Major), 7.29 (dd,  $J = 7.9, 1.4$  Hz, 1H Minor), 7.22 (dd,  $J = 7.7, 1.5$  Hz, 1H Minor), 7.20–7.15 (m, 2H Major), 7.15 (d,  $J = 1.3$  Hz, 1H Minor), 7.11 (ddd,  $J = 7.6, 6.0, 3.0$  Hz, 1H Major), 7.02 (d,  $J = 8.4$  Hz, 1H Minor), 6.87 (s, 1H Major), 6.62 (d,  $J = 8.4$  Hz, 1H Minor), 6.43 (s, 1H Major), 4.99 (q,  $J = 7.2$  Hz, 1H Minor), 4.84 (q,  $J = 7.2$  Hz, 1H Major), 3.83 (s, 3H Major), 3.75 (s, 3H Major), 3.73 (s, 3H Minor), 3.33 (s, 3H Minor), 2.22 (s, 3H Minor), 2.15 (s, 3H Major), 1.67 (d,  $J = 7.2$  Hz, 3H Minor), 1.52 (d,  $J = 7.2$  Hz, 3H Major).

**$^{13}C$  NMR** (101 MHz,  $CDCl_3$ )  $\delta$ , ppm: 157.6 (Minor), 157.2 (Minor), 156.8 (Major), 156.1 (Major), 144.5 (Major), 143.8 (Minor), 134.1 (Minor), 134.0 (Major), 129.8 (Minor), 129.5 (Major), 129.4 (Minor), 129.4 (Major), 129.3 (Minor), 128.5 (Major), 126.9 (Major), 126.8 (Minor), 126.7 (Major), 126.6 (Minor), 126.3 (Minor), 125.1 (Major), 123.5 (Minor), 117.8 (Major), 107.5 (Minor), 95.7 (Major), 60.1 (Minor), 56.1 (Major), 55.9 (Minor), 55.6 (Major), 34.4 (Major), 33.5 (Minor), 20.4 (Major), 19.4 (Minor), 16.3 (Minor), 15.7 (Major).

**HRMS** m/z calculated for C<sub>17</sub>H<sub>19</sub>O<sub>2</sub>Cl, 290.1068, found: 290.1070.

**IR** (ATR),  $\nu$ , cm<sup>-1</sup>: 1470, 1450, 1296, 1205, 1113, 1034, 824, 767.

**1-(3-(1-(2,4-dimethoxy-5-methylphenyl)ethyl)phenyl)ethan-1-one**

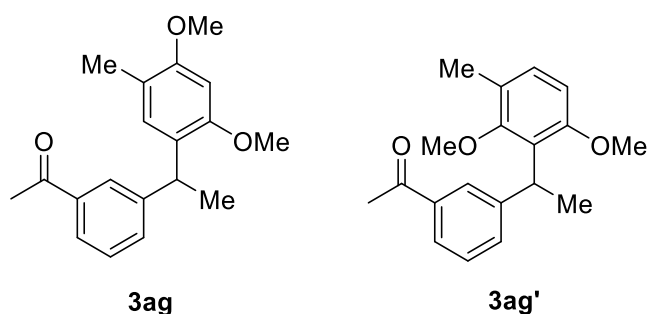

Following the general procedure, 1-(3-ethylphenyl)ethan-1-one **1g** (59.3 mg, 0.4 mmol) was irradiated for 24 h then 2,4-dimethoxytoluene **2a** (283  $\mu$ L, 2.0 mmol) was added and the reaction was heated to 90 °C for 16 hours. The product was purified by flash chromatography using an eluent of 3% to 5% EtOAc:hexanes to afford 1-(3-(1-(2,4-dimethoxy-5-methylphenyl)ethyl)phenyl)ethan-1-one **3ag** (83.3 mg, 70%) as a yellow oil. (12% of minor isomer **3ag'** determined by <sup>1</sup>H NMR)

**<sup>1</sup>H NMR** (400 MHz, CDCl<sub>3</sub>)  $\delta$ , ppm: 7.88 (t,  $J$  = 1.9 Hz, 1H), 7.74 (dt,  $J$  = 7.8, 1.5 Hz, 1H), 7.43 (dt,  $J$  = 7.7, 1.6 Hz, 1H), 7.34 (t,  $J$  = 7.7 Hz, 1H), 6.90 (s, 1H), 6.42 (s, 1H), 4.52 (q,  $J$  = 7.3 Hz, 1H), 3.82 (s, 3H), 3.76 (s, 3H), 2.58 (s, 3H), 2.13 (s, 3H), 1.59 (d,  $J$  = 7.3 Hz, 3H).

**<sup>13</sup>C NMR** (101 MHz, CDCl<sub>3</sub>)  $\delta$ , ppm: 198.5, 156.7, 155.7, 147.6, 137.0, 132.5, 129.3, 128.3, 127.3, 125.9, 125.5, 118.0, 95.4, 55.8, 55.5, 36.9, 26.7, 20.9, 15.5.

**HRMS** m/z calculated for C<sub>19</sub>H<sub>22</sub>O<sub>3</sub>Na, 321.1461, found: 321.1447.

**IR** (ATR),  $\nu$ , cm<sup>-1</sup>: 1681, 1510, 1436, 1271, 1204, 1191, 1115, 1035, 816, 695.

**1,5-dimethoxy-2-methyl-4-(1-phenylpropyl)benzene**

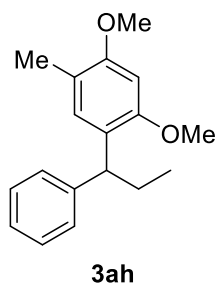

Following the general procedure, propylbenzene **1h** (56.0  $\mu$ L, 0.4 mmol) was irradiated for 48 h then 2,4-dimethoxytoluene **2a** (118  $\mu$ L, 0.8 mmol) was added. The product was purified by flash chromatography using an eluent of 1% to 3% EtOAc:hexanes to afford 1,5-dimethoxy-2-methyl-4-(1-phenylpropyl)benzene **3ah** (56.2 mg, 52%) as a white solid.

**m. p.** = 58–59°C

**$^1\text{H}$  NMR** (400 MHz,  $\text{CDCl}_3$ )  $\delta$ , ppm: 7.29–7.21 (m, 4H), 7.13 (m, 1H), 6.96 (s, 1H), 6.41 (s, 1H), 4.19 (t,  $J = 7.8$  Hz, 1H), 3.81 (s, 3H), 3.76 (s, 3H), 2.14 (s, 3H), 2.0–1.94 (m, 2H), 0.89 (t,  $J = 7.3$  Hz, 3H).

**$^{13}\text{C}$  NMR** (101 MHz,  $\text{CDCl}_3$ )  $\delta$ , ppm: 156.5, 156.2, 145.8, 129.5, 128.2, 128.2, 125.6, 125.3, 118.1, 95.7, 56.2, 55.6, 44.6, 28.2, 15.7, 13.0.

**HRMS**  $m/z$  calculated for  $\text{C}_{18}\text{H}_{22}\text{O}_2\text{Na}$ , 293.1512, found: 293.1501.

**IR** (ATR),  $\nu$ ,  $\text{cm}^{-1}$ : 1519, 1461, 1296, 1205, 1119, 1035, 812, 764, 699.

**((2,4-dimethoxy-5-methylphenyl)methylene)dibenzene**

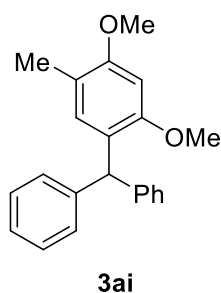

Following the general procedure, diphenylmethane **1i** (67.0  $\mu$ L, 0.4 mmol) was irradiated for 24 h then 2,4-dimethoxytoluene **2a** (118  $\mu$ L, 0.8 mmol) was added. The product was purified by flash chromatography using an eluent of 8% to 10% DCM:hexanes to afford ((2,4-dimethoxy-5-methylphenyl)methylene)dibenzene **3ai** (87.4 mg, 69%) as a white solid.

**m. p.** = 133–134°C

**<sup>1</sup>H NMR** (400 MHz, CDCl<sub>3</sub>) δ, ppm: 7.28–7.22 (m, 4H), 7.22–7.15 (m, 2H), 7.13–7.08 (m, 4H), 6.62 (s, 1H), 6.45 (s, 1H), 5.85 (s, 1H), 3.83 (s, 3H), 3.70 (s, 3H), 2.06 (s, 3H).

**<sup>13</sup>C NMR** (101 MHz, CDCl<sub>3</sub>) δ, ppm: 157.0, 156.1, 144.5, 132.1, 129.5, 128.2, 126.0, 124.2, 117.9, 95.6, 56.2, 55.6, 49.1, 15.7.

**HRMS** m/z calculated for C<sub>22</sub>H<sub>22</sub>O<sub>2</sub>Na, 341.1512, found: 341.1501.

**IR** (ATR), ν, cm<sup>-1</sup>: 1508, 1436, 1297, 1207, 1172, 1104, 1037, 817, 737, 699.

### 3-(2,4-dimethoxy-5-methylphenyl)-3-phenylpropyl acetate

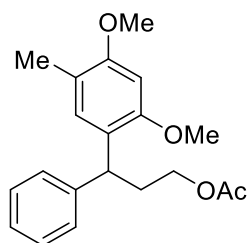

**3aj**

Following the general procedure, 3-phenylpropyl acetate **1j** (72.0 μL, 0.4 mmol) was irradiated for 48 h then 2,4-dimethoxytoluene **2a** (118 μL, 0.8 mmol) was added. The product was purified by flash chromatography using an eluent of 2% to 4% EtOAc:hexanes to afford 3-(2,4-dimethoxy-5-methylphenyl)-3-phenylpropyl acetate **3aj** (80.4 mg, 61%) as an off white solid.

**m. p.** = 76–77°C

**<sup>1</sup>H NMR** (400 MHz, CDCl<sub>3</sub>) δ, ppm: 7.36–7.23 (m, 4H), 7.17 (ddd, *J* = 8.7, 5.3, 3.3 Hz, 1H), 6.95 (s, 1H), 6.42 (s, 1H), 4.44 (t, *J* = 7.9 Hz, 1H), 4.04 (qt, *J* = 11.0, 6.9 Hz, 2H), 3.82 (s, 3H), 3.78 (s, 3H), 2.36 (qd, *J* = 7.0, 3.3 Hz, 2H), 2.15 (s, 3H), 2.03 (s, 3H).

**<sup>13</sup>C NMR** (101 MHz, CDCl<sub>3</sub>) δ, ppm: 171.2, 156.9, 156.0, 144.7, 129.5, 128.3, 128.0, 126.0, 123.9, 118.2, 95.6, 63.5, 56.0, 55.6, 39.5, 33.8, 21.1, 15.7.

**HRMS** m/z calculated for C<sub>20</sub>H<sub>25</sub>O<sub>4</sub>, 329.1747, found: 329.1738.

**IR** (ATR), ν, cm<sup>-1</sup>: 1744, 1733, 1298, 1246, 1206, 1034, 813, 700.

### 2-(3-(2,4-dimethoxy-5-methylphenyl)-3-phenylpropyl)isoindoline-1,3-dione

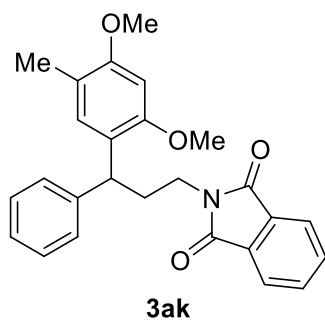

Following the general procedure, 2-(3-phenylpropyl)isoindoline-1,3-dione **1k** (106 mg, 0.4 mmol) was irradiated for 48 h then 2,4-dimethoxytoluene **2a** (118  $\mu$ L, 0.8 mmol) was added. The product was purified by flash chromatography using an eluent of 8% to 12% EtOAc:hexanes to afford 2-(3-(2,4-dimethoxy-5-methylphenyl)-3-phenylpropyl)isoindoline-1,3-dione **3ak** (107.0 mg, 64%) as a white solid.

**m. p.** = 156–159°C

**$^1\text{H}$  NMR** (400 MHz,  $\text{CDCl}_3$ )  $\delta$ , ppm: 7.80–7.73 (m, 2H), 7.70–7.62 (m, 2H), 7.30 (d,  $J$  = 7.7 Hz, 2H), 7.22 (t,  $J$  = 7.5 Hz, 2H), 7.08 (t,  $J$  = 7.3 Hz, 1H), 6.96 (s, 1H), 6.32 (s, 1H), 4.40 (t,  $J$  = 7.8 Hz, 1H), 3.76 (s, 3H), 3.74 (s, 4H), 3.70 (t,  $J$  = 7.0 Hz, 2H), 2.49–2.34 (m, 2H), 2.07 (s, 2H).

**$^{13}\text{C}$  NMR** (101 MHz,  $\text{CDCl}_3$ )  $\delta$ , ppm: 168.3, 156.7, 155.8, 144.6, 133.7, 132.3, 129.5, 128.0, 125.9, 123.8, 123.0, 118.1, 95.5, 55.9, 55.5, 41.1, 37.5, 33.1, 15.6.

**HRMS**  $m/z$  calculated for  $\text{C}_{26}\text{H}_{25}\text{O}_4\text{NNa}$ , 438.1676, found: 438.1662.

**IR** (ATR),  $\nu$ ,  $\text{cm}^{-1}$ : 1703, 1395, 1354, 1300, 1206, 1119, 1035, 882, 814, 720, 701.

#### 4-(2-(2,4-dimethoxy-5-methylphenyl)propan-2-yl)-1,1'-biphenyl

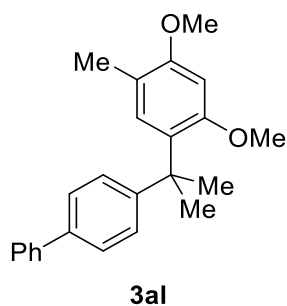

Following the general procedure, 4-isopropyl-1,1'-biphenyl **1l** (56.4  $\mu$ L, 0.4 mmol) was irradiated for 6 h then 2,4-dimethoxytoluene **2a** (283  $\mu$ L, 2.0 mmol) was added and the reaction

was heated to 90 °C for 16 hours. The product was purified by flash chromatography using an eluent of 1% to 6% EtOAc:hexanes to afford 1,5-dimethoxy-2-methyl-4-(1-phenylethyl)benzene **3al** (62.2 mg, 45%) as a yellow solid.

**m. p.** = 126–129°C

**<sup>1</sup>H NMR** (400 MHz, CDCl<sub>3</sub>) δ, ppm: 7.59 (d, *J* = 8.4 Hz, 2H), 7.46 (d, *J* = 8.4 Hz, 2H), 7.41 (t, *J* = 7.7 Hz, 2H), 7.33–7.28 (m, 1H), 7.26–7.24 (m, 2H), 7.22 (s, 1H), 6.39 (s, 1H), 3.81 (s, 3H), 3.32 (s, 3H), 2.23 (s, 3H), 1.68 (s, 6H).

**<sup>13</sup>C NMR** (101 MHz, CDCl<sub>3</sub>) δ, ppm: 156.9, 151.4, 141.3, 137.4, 130.4, 128.8, 128.7, 127.0, 126.9, 126.3, 126.3, 117.5, 97.8, 56.0, 55.6, 41.2, 30.0, 15.9.

**HRMS** *m/z* calculated for C<sub>24</sub>H<sub>26</sub>O<sub>2</sub>Na, 369.1825, found: 369.1814.

**IR** (ATR), ν, cm<sup>-1</sup>: 623, 589, 579, 575, 565.

**(8R,9S,13S,14S)-2-(1-(3-(tert-butyl)phenyl)ethyl)-3-hydroxy-13-methyl-6,7,8,9,11,12,13,14,15,16-decahydro-17H-cyclopenta[a]phenanthren-17-one**

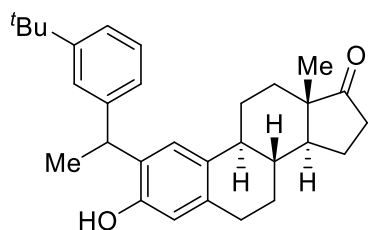

**3ma**

Following the general procedure, 1-*tert*-butyl-3-ethylbenzene **1a** (76.0 μL, 0.4 mmol) was irradiated for 24 h then (8R,9S,13S,14S)-3-hydroxy-13-methyl-6,7,8,9,11,12,13,14,15,16-decahydro-17H-cyclopenta[a]phenanthren-17-one **2m** (216 mg, 0.8 mmol) was added. The product was purified by flash chromatography using an eluent of 2% to 5% EtOAc:hexanes to afford (8R,9S,13S,14S)-2-(1-(3-(tert-butyl)phenyl)ethyl)-3-hydroxy-13-methyl-6,7,8,9,11,12,13,14,15,16-decahydro-17H-cyclopenta[a]phenanthren-17-one **3ma** (110.1 mg, 64%) as a white solid.

**m. p.** = 168–171°C

**<sup>1</sup>H NMR** (400 MHz, CDCl<sub>3</sub>) δ, ppm: 7.39–7.34 (m, 1H), 7.25–7.20 (m, 2H), 7.15 (s, 1H), 7.05–7.00 (m, 1H), 6.52 (d, *J* = 5.0 Hz, 1H), 4.70 (d, *J* = 5.1 Hz, 1H), 4.31 (q, *J* = 7.2 Hz, 1H),

2.93 – 2.77 (m, 2H), 2.51 (dd,  $J = 18.9, 8.6$  Hz, 1H), 2.43–2.34 (m, 1H), 2.31–2.23 (m, 1H), 2.20–2.11 (m, 1H), 2.10 – 1.92 (m, 3H), 1.70 – 1.38 (m, 9H), 1.31 (s, 9H), 0.93 (d,  $J = 4.4$  Hz, 3H).

$^{13}\text{C}$  NMR (126 MHz,  $\text{CDCl}_3$ )  $\delta$ , ppm: 221.1 (d,  $J = 2.1$  Hz), 151.5 (dd,  $J = 23.7, 6.5$  Hz), 144.8 (d,  $J = 6.8$  Hz), 135.7 (d,  $J = 2.7$  Hz), 131.9 (d,  $J = 2.5$  Hz), 129.5 (d,  $J = 14.2$  Hz), 128.5 (d,  $J = 3.5$  Hz), 125.0, 124.8, 124.6 (d,  $J = 3.5$  Hz), 124.5 (d,  $J = 5.1$  Hz), 123.5 (d,  $J = 3.7$  Hz), 116.1, 50.4 (d,  $J = 1.9$  Hz), 48.1, 44.1 (d,  $J = 8.3$  Hz), 39.4 (d,  $J = 11.8$  Hz), 38.4, 35.9, 34.7, 31.6 (d,  $J = 1.7$  Hz), 31.4 (d,  $J = 1.0$  Hz), 29.1 (d,  $J = 2.6$  Hz), 26.6, 26.1 (d,  $J = 7.9$  Hz), 21.6, 21.2 (d,  $J = 21.7$  Hz), 13.9 (d,  $J = 2.3$  Hz).

HRMS  $m/z$  calculated for  $\text{C}_{30}\text{H}_{37}\text{O}_2$ , 429.2799, found: 429.2797.

IR (ATR),  $\nu$ ,  $\text{cm}^{-1}$ : 1718, 1420, 1256, 1204, 893, 705.

#### 4-(1-([1,1'-biphenyl]-4-yl)ethyl)-6-hexylbenzene-1,3-diol

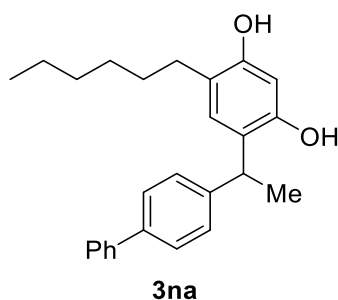

Following the general procedure, 4-ethyl-1,1'-biphenyl **1c** (73.0 mg, 0.4 mmol) was irradiated for 3 h then 4-hexylbenzene-1,3-diol **2n** (233 mg, 1.2 mmol.) was added and the reaction was heated to 90 °C for 3 hours. The product was purified by Ag impregnated silica gel chromatography using an eluent of 12% to 14% EtOAc:hexanes to afford 4-(1-([1,1'-biphenyl]-4-yl)ethyl)-6-hexylbenzene-1,3-diol **3na** (46.3 mg, 31%) as an orange solid.

**m. p.** = 53–55°C

$^1\text{H}$  NMR (400 MHz,  $\text{CDCl}_3$ )  $\delta$ , ppm: 7.60–7.56 (m, 2H), 7.53 (d,  $J = 8.2$  Hz, 2H), 7.43 (t,  $J = 7.7$  Hz, 2H), 7.38–7.29 (m, 3H), 7.00 (s, 1H), 6.26 (s, 1H), 4.65 (s, 1H), 4.56 (s, 1H), 4.30 (q,  $J = 7.2$  Hz, 1H), 2.58–2.53 (m, 2H), 1.70–1.54 (m, 5H), 1.46–1.26 (m, 6H), 1.00–0.85 (m, 3H).

$^{13}\text{C}$  NMR (126 MHz,  $\text{CDCl}_3$ )  $\delta$ , ppm: 152.3, 151.9, 144.7, 140.7, 139.1, 129.0, 128.5, 127.6, 127.3, 126.9, 126.8, 123.7, 120.4, 103.5, 37.9, 31.6, 30.0, 29.3, 29.0, 22.5, 21.1, 13.9.

**HRMS**  $m/z$  calculated for  $C_{26}H_{29}O_2$ , 373.2160, found: 373.2160.

**IR** (ATR),  $\nu$ ,  $cm^{-1}$ : 1191, 1110, 835, 690, 608, 595, 584.

**2-(2-(1-(3-(tert-butyl)phenyl)ethyl)-4,5-dimethoxyphenyl)acetic acid**

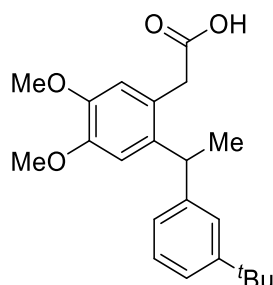

**30a**

Following the general procedure, 1-*tert*-butyl-3-ethylbenzene **1a** (76.0  $\mu$ L, 0.4 mmol) was irradiated for 24 h then 2-(3,4-dimethoxyphenyl)acetic acid **2o** (157 mg, 0.8 mmol) was added. The product was purified by flash chromatography using an eluent of 86.5:12.5:1 EtOAc:hexanes:AcOH to afford 2-(2-(1-(3-(tert-butyl)phenyl)ethyl)-4,5-dimethoxyphenyl)acetic acid **30a** (40.1 mg, 28%) as a yellow solid.

**m. p.** = 114–119°C

**$^1H$  NMR** (400 MHz, Acetone- $d_6$ )  $\delta$ , ppm: 7.38 (s, 1H), 7.23–7.13 (m, 2H), 7.04 (dt,  $J$  = 6.7, 1.9 Hz, 1H), 6.85 (s, 1H), 6.83 (s, 1H), 4.38 (q,  $J$  = 7.2 Hz, 1H), 3.76 (s, 3H), 3.73 (s, 3H), 3.64 (d,  $J$  = 15.9 Hz, 1H), 3.53 (d,  $J$  = 15.9 Hz, 1H), 1.57 (d,  $J$  = 7.1 Hz, 3H), 1.27 (s, 9H).

**$^{13}C$  NMR** (126 MHz, Acetone- $d_6$ )  $\delta$ , ppm: 173.4, 151.6, 149.3, 148.2, 146.8, 138.3, 128.8, 126.0, 125.5, 125.4, 123.5, 115.8 (d,  $J$  = 2.4 Hz), 112.4 (d,  $J$  = 2.4 Hz), 56.2 (d,  $J$  = 4.1 Hz), 56.1 (d,  $J$  = 4.5 Hz), 41.1 (d,  $J$  = 2.4 Hz), 38.5, 35.1, 31.7 (d,  $J$  = 2.4 Hz), 22.5 (d,  $J$  = 2.3 Hz).

**HRMS**  $m/z$  calculated for  $C_{22}H_{27}O_4$ , 355.1915, found: 355.1921.

**IR** (ATR),  $\nu$ ,  $cm^{-1}$ : 1718, 1517, 1268, 1218, 1172, 1200, 1108, 864, 805, 711.

**(5-(1-([1,1'-biphenyl]-4-yl)ethyl)-2-hydroxy-4-methoxyphenyl)(phenyl)methanone**



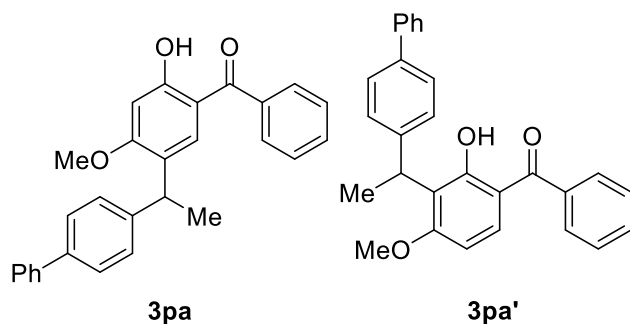

Following the general procedure, 4-ethyl-1,1'-biphenyl **1c** (73.0 mg, 0.4 mmol) was irradiated for 3 h then (2-hydroxy-4-methoxyphenyl)(phenyl)methanone **2p** (183 mg, 0.8 mmol) was added. The product was purified by Ag impregnated silica gel chromatography using an eluent of 5.5% EtOAc:hexanes to afford (5-(1-([1,1'-biphenyl]-4-yl)ethyl)-2-hydroxy-4-methoxyphenyl)(phenyl)methanone **3pa** (58.8 mg, 36%) as a yellow oil. (17% of other isomer **3pa'** determined by  $^1\text{H}$  NMR).

$^1\text{H}$  NMR (400 MHz,  $\text{CDCl}_3$ )  $\delta$ , ppm: 12.67 (s, 1H), 7.61–7.53 (m, 4H), 7.51–7.47 (m, 3H), 7.45 (t,  $J = 7.5$  Hz, 2H), 7.42–7.32 (m, 4H), 7.24 (d,  $J = 8.1$  Hz, 2H), 6.52 (s, 1H), 4.47 (q,  $J = 7.2$  Hz, 1H), 3.88 (s, 3H), 1.50 (d,  $J = 7.2$  Hz, 3H).

$^{13}\text{C}$  NMR (101 MHz,  $\text{CDCl}_3$ )  $\delta$ , ppm: 200.2, 165.4, 164.1, 145.4, 141.4, 139.3, 138.6, 133.3, 131.9, 129.5, 129.2, 128.6, 128.4, 127.5, 127.4, 127.4, 127.0, 112.7, 99.8, 56.3, 37.2, 21.1.

HRMS  $m/z$  calculated for  $\text{C}_{28}\text{H}_{23}\text{O}_3$ , 407.1646, found: 407.1647.

IR (ATR),  $\nu$ ,  $\text{cm}^{-1}$ : 1623, 1344, 1250, 1204, 837, 764, 730, 696, 595.

#### 5-(4-(1-([1,1'-biphenyl]-4-yl)ethyl)-2,5-dimethylphenoxy)-2,2-dimethylpentanoic acid

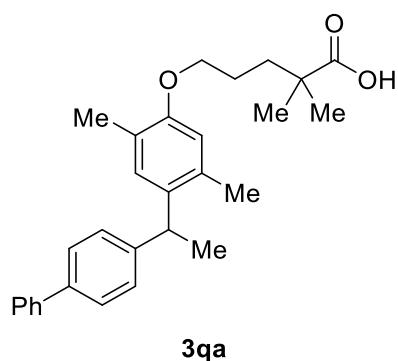

Following the general procedure, 4-ethyl-1,1'-biphenyl **1c** (73.0 mg, 0.4 mmol) was irradiated for 3 h then (2-hydroxy-4-methoxyphenyl)(phenyl)methanone **2q** (183 mg, 0.8 mmol) was

added. The product was purified by Ag impregnated silica gel chromatography using an eluent of 5:94:1 EtOAc:hexanes:AcOH to afford 5-(4-(1-([1,1'-biphenyl]-4-yl)ethyl)-2,5-dimethylphenoxy)-2,2-dimethylpentanoic acid **3qa** (115.4 mg, 67%) as an off white solid.

**m. p.** = 116–119°C

**<sup>1</sup>H NMR** (400 MHz, CDCl<sub>3</sub>) δ, ppm: 7.60–7.54 (m, 2H), 7.49 (d, *J* = 8.3 Hz, 2H), 7.41 (t, *J* = 7.7 Hz, 2H), 7.35–7.29 (m, 1H), 7.22 (d, *J* = 8.3 Hz, 2H), 7.05 (s, 1H), 6.59 (s, 1H), 4.27 (q, *J* = 7.2 Hz, 1H), 3.93 (t, *J* = 5.8 Hz, 2H), 2.22 (s, 3H), 2.21 (s, 3H), 1.85–1.72 (m, 4H), 1.61 (d, *J* = 7.2 Hz, 3H), 1.26 (s, 6H).

**<sup>13</sup>C NMR** (101 MHz, CDCl<sub>3</sub>) δ, ppm: 184.1, 155.3, 146.1, 141.2, 138.7, 135.5, 134.3, 129.1, 128.8, 128.1, 127.1, 124.0, 113.4, 68.1, 42.1, 40.1, 37.0, 25.3, 25.1 (d, *J* = 1.9 Hz), 22.4, 19.9, 16.1.

**HRMS** *m/z* calculated for C<sub>29</sub>H<sub>33</sub>O<sub>3</sub>, 429.2427, found: 429.2431.

**IR** (ATR), ν, cm<sup>-1</sup>: 1694, 1102, 833, 764, 695, 583, 574.

### 1.3 References

1. M. Xiang, Z.-K. Xin, B. Chen, C.-H. Tung and L.-Z. Wu, *Org. Lett.*, 2017, **19**, 3009-3012.
2. S. Bresciani and D. O'Hagan, *Tetrahedron Lett.*, 2010, **51**, 5795-5797.

## 1.4 NMR spectral data

### $^1\text{H}$ NMR (400 MHz, $\text{CDCl}_3$ )

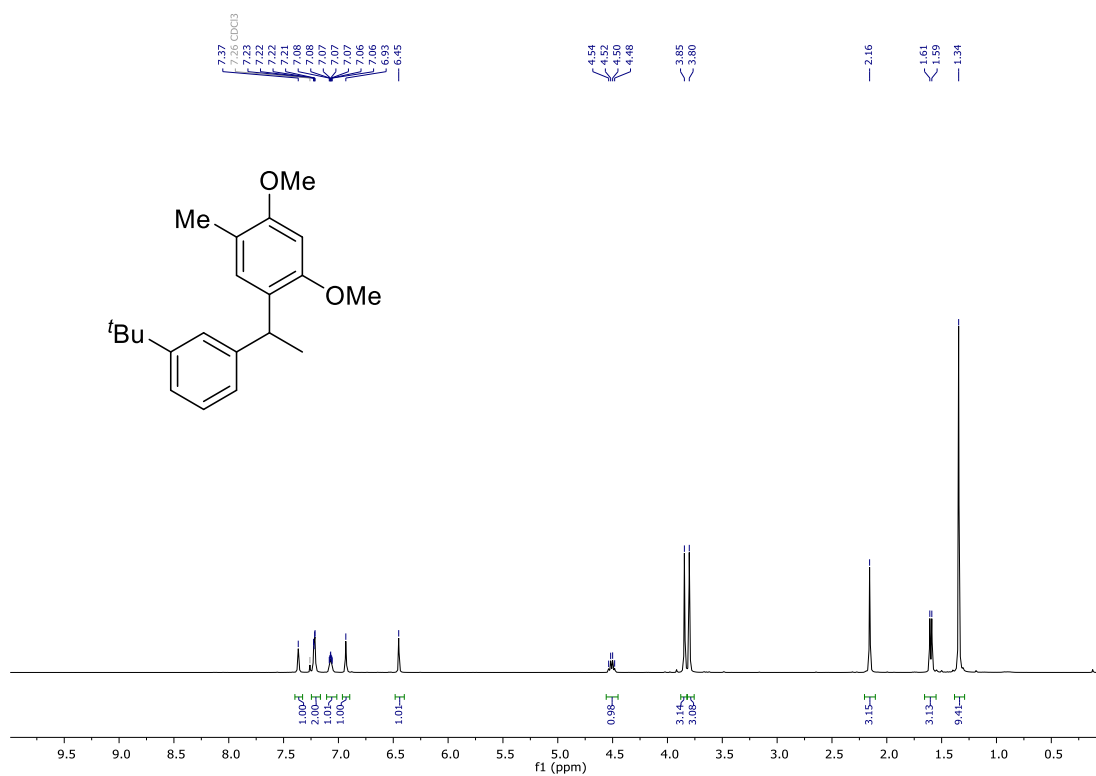

### $^{13}\text{C}$ NMR (101 MHz, $\text{CDCl}_3$ )

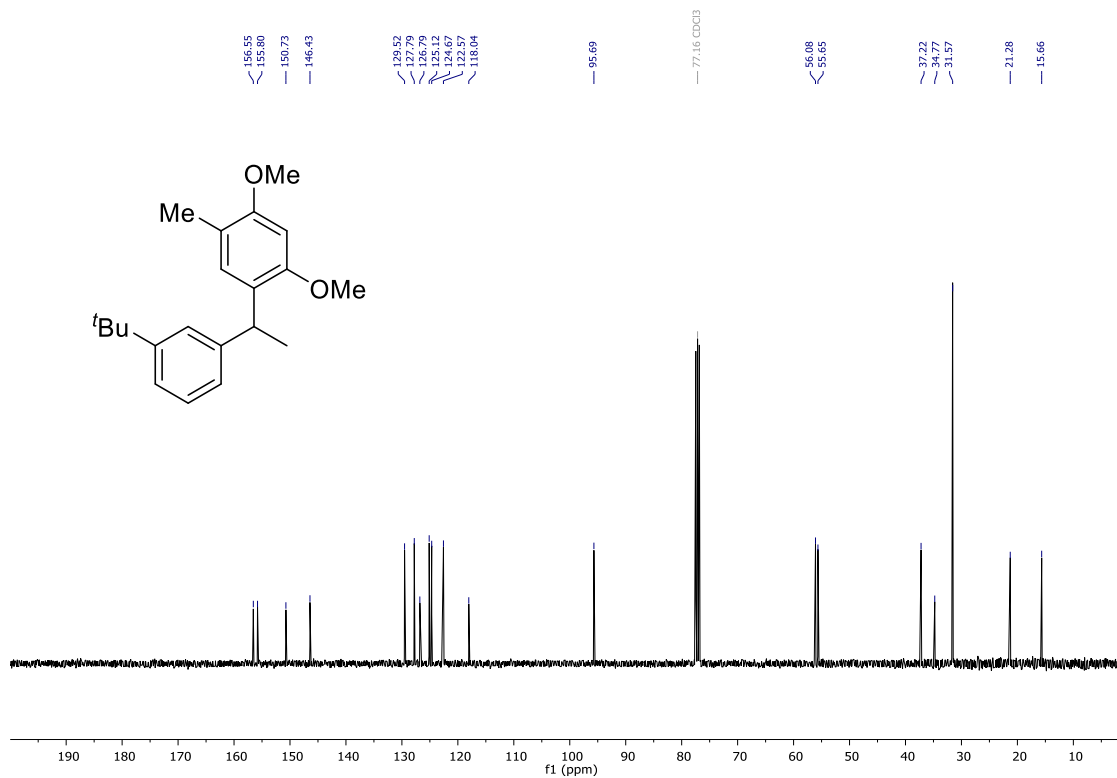

# <sup>1</sup>H NMR (400 MHz, CDCl<sub>3</sub>)

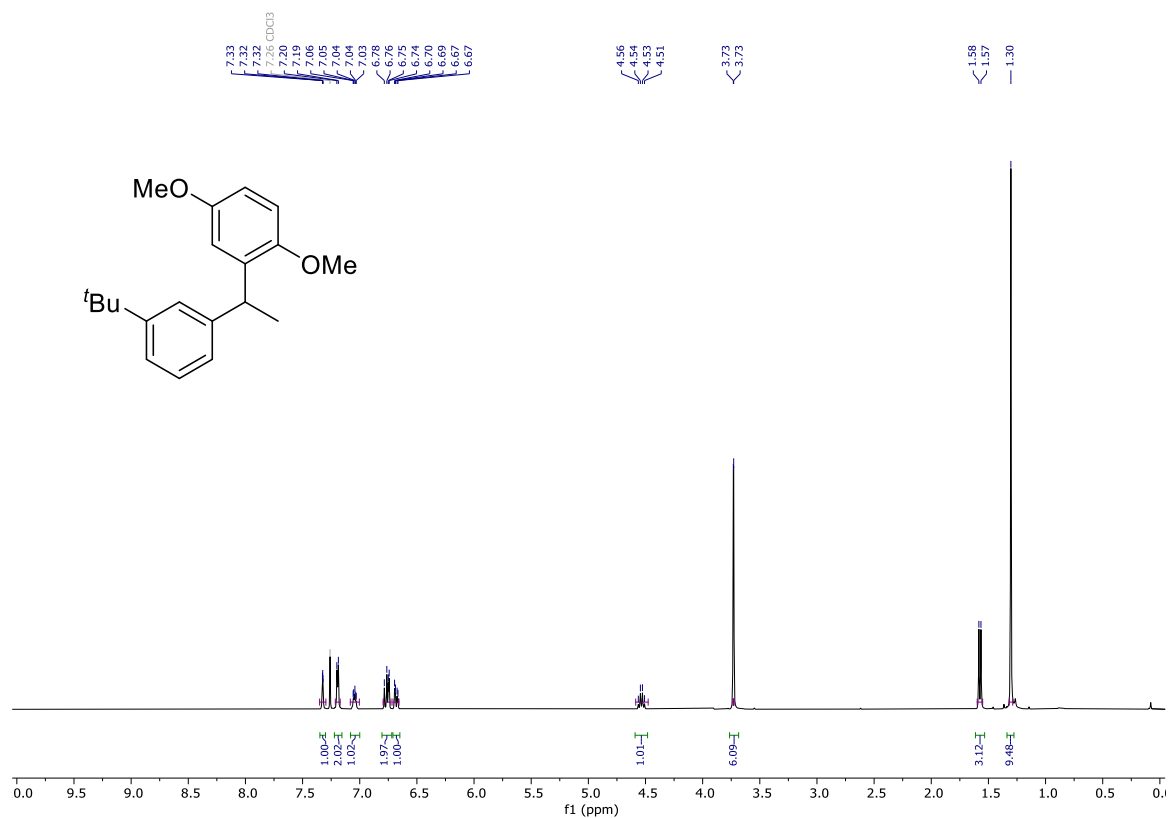

# <sup>13</sup>C NMR (101 MHz, CDCl<sub>3</sub>)

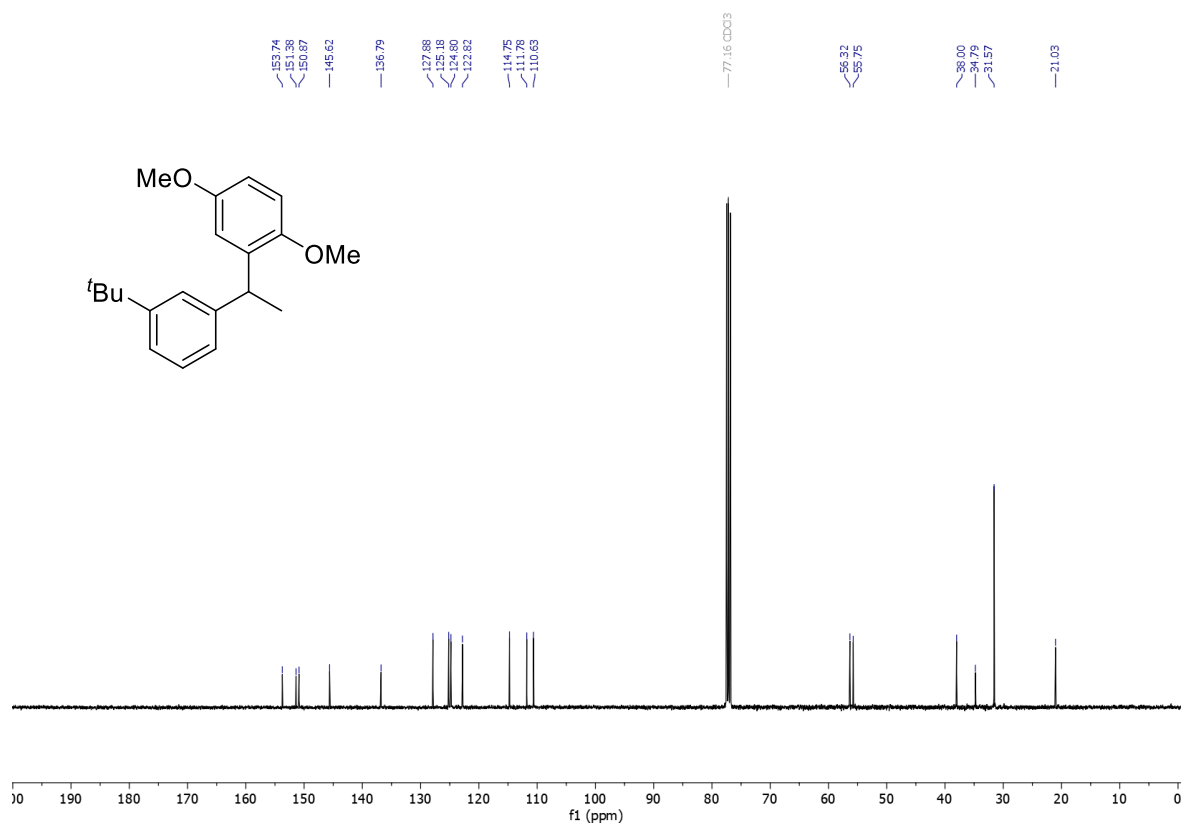

# <sup>1</sup>H NMR (400 MHz, CDCl<sub>3</sub>)

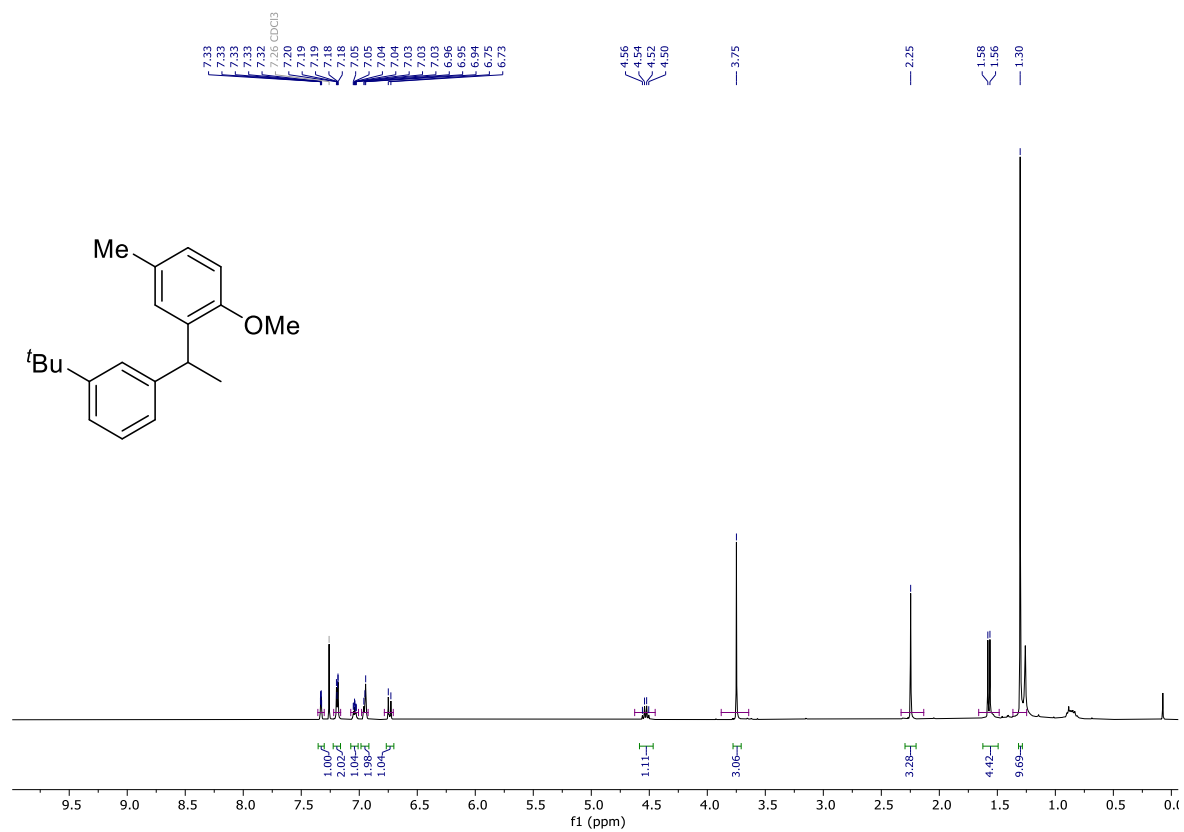

# <sup>13</sup>C NMR (101 MHz, CDCl<sub>3</sub>)

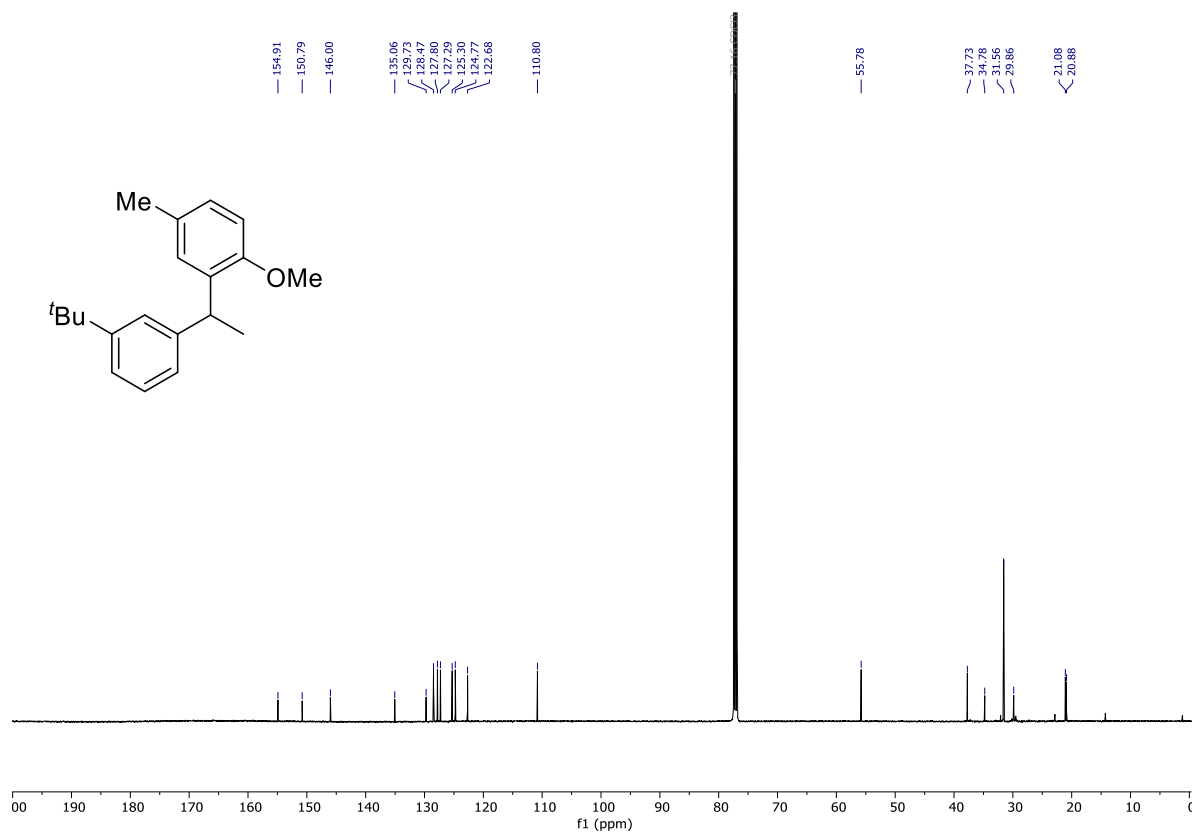

# <sup>1</sup>H NMR (400 MHz, CDCl<sub>3</sub>)

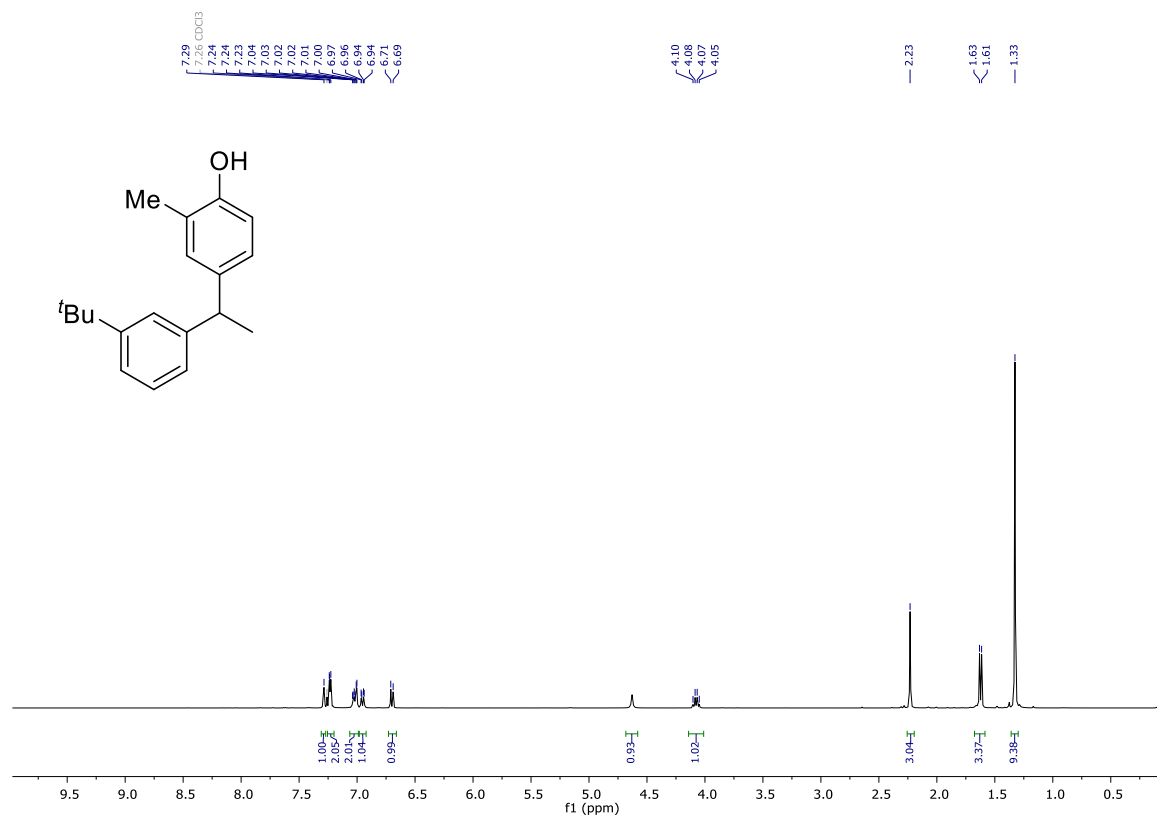

# <sup>13</sup>C NMR (101 MHz, CDCl<sub>3</sub>)

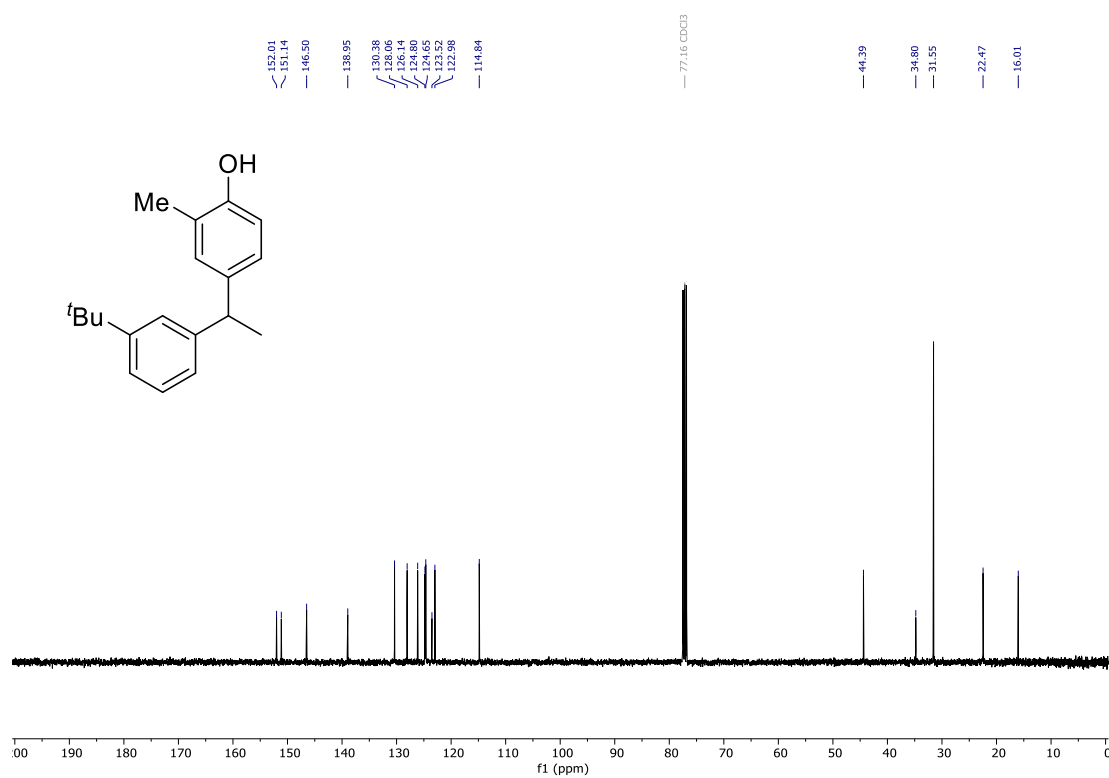

# <sup>1</sup>H NMR (400 MHz, CDCl<sub>3</sub>)

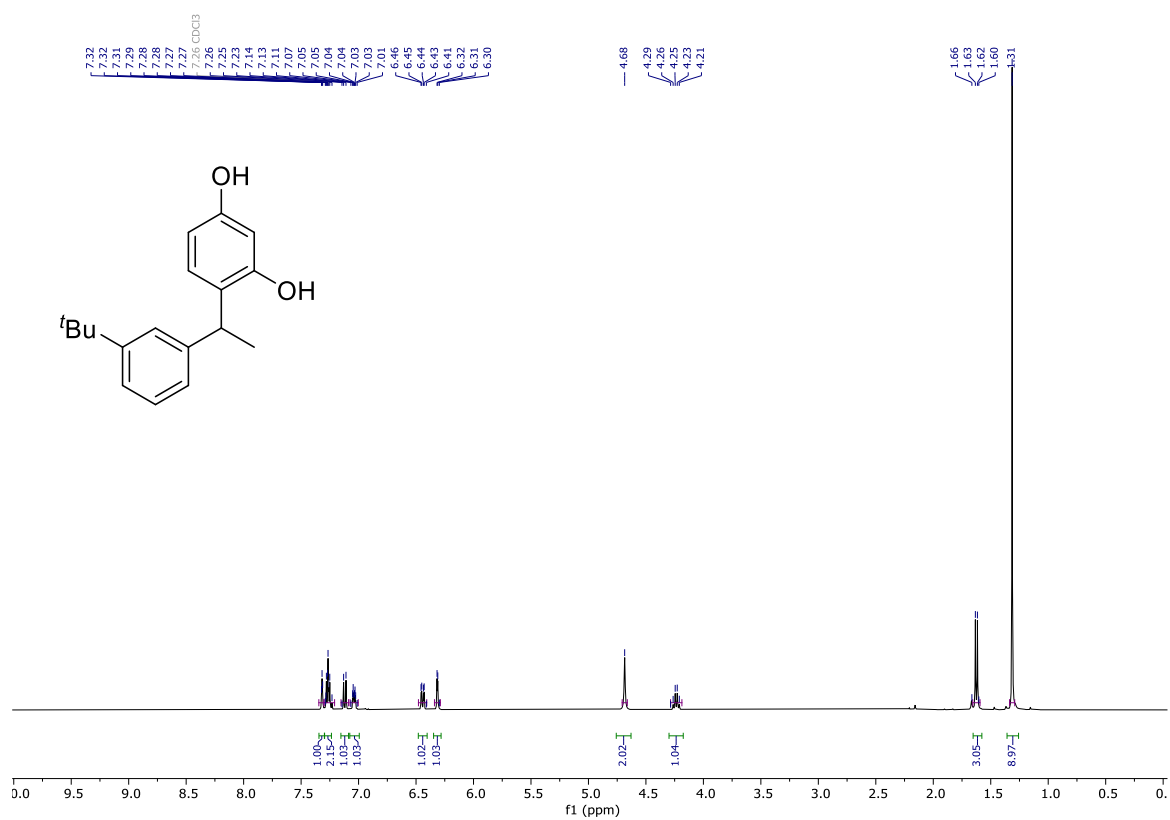

# <sup>13</sup>C NMR (101 MHz, CDCl<sub>3</sub>)

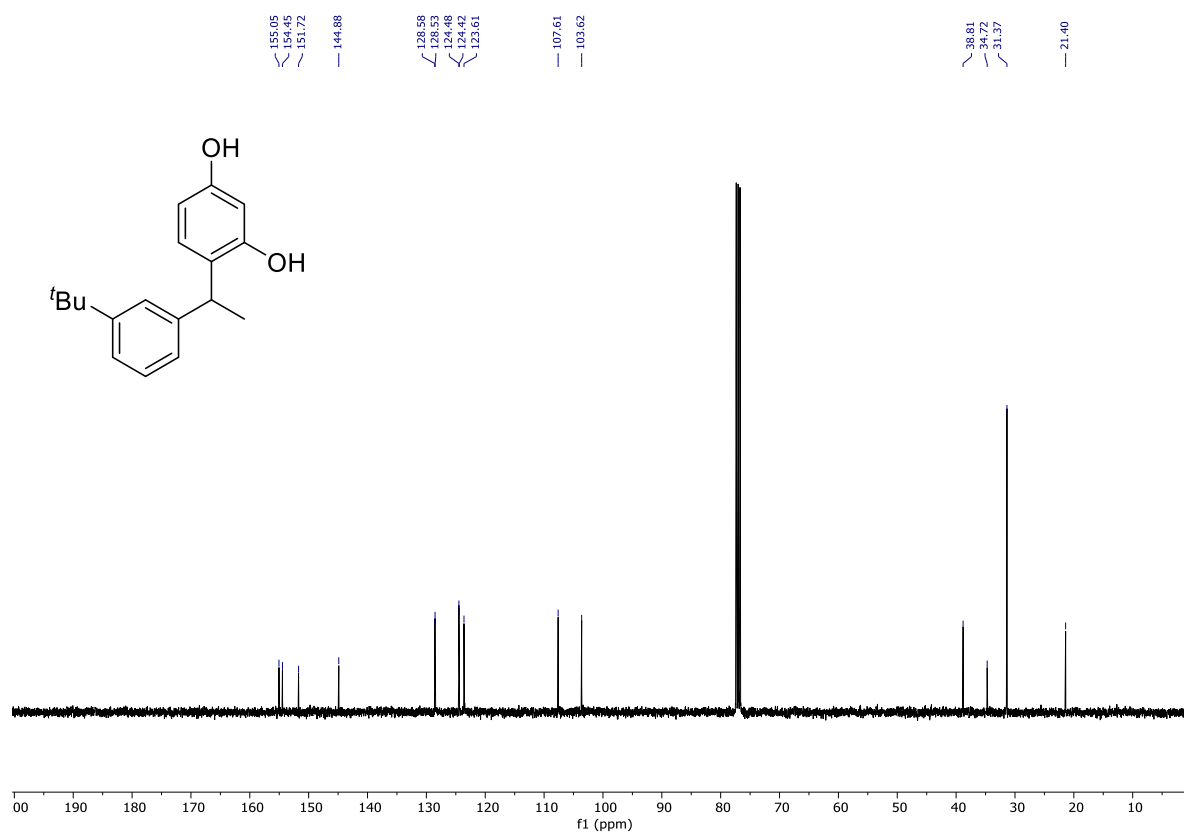

# <sup>1</sup>H NMR (400 MHz, CDCl<sub>3</sub>)

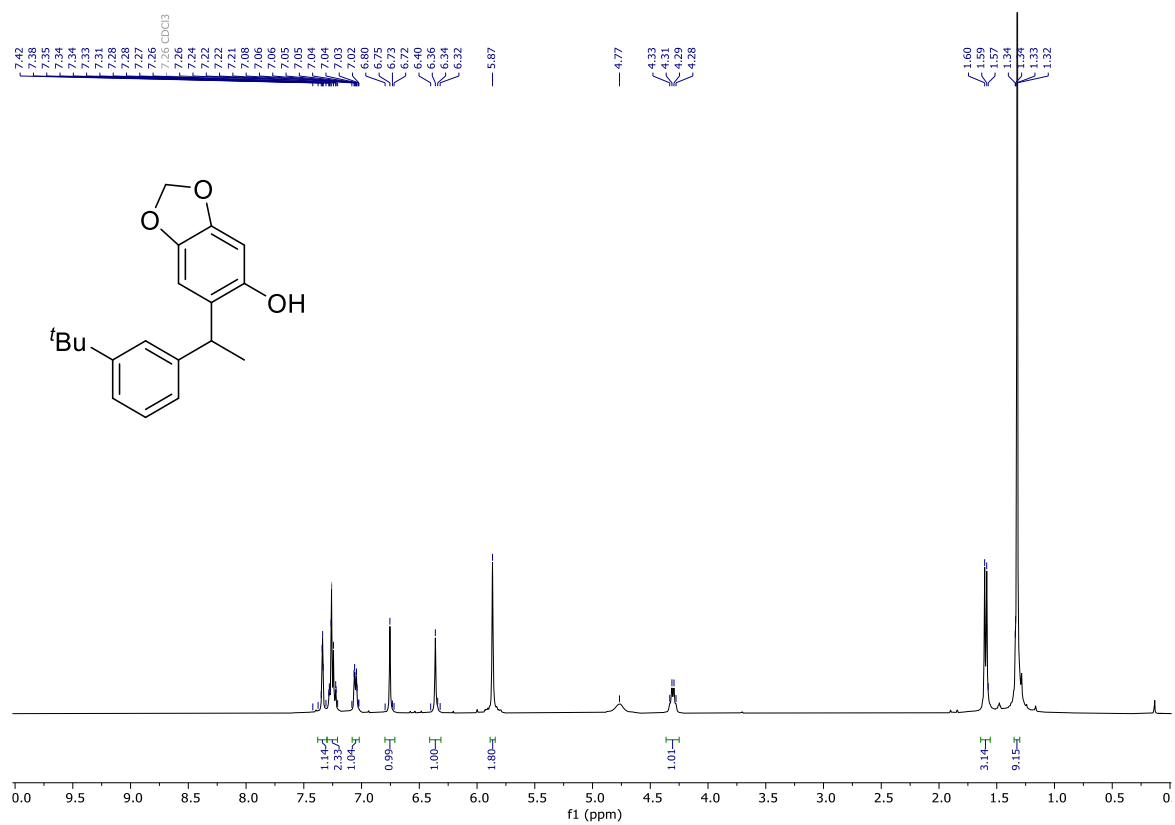

# <sup>13</sup>C NMR (101 MHz, CDCl<sub>3</sub>)

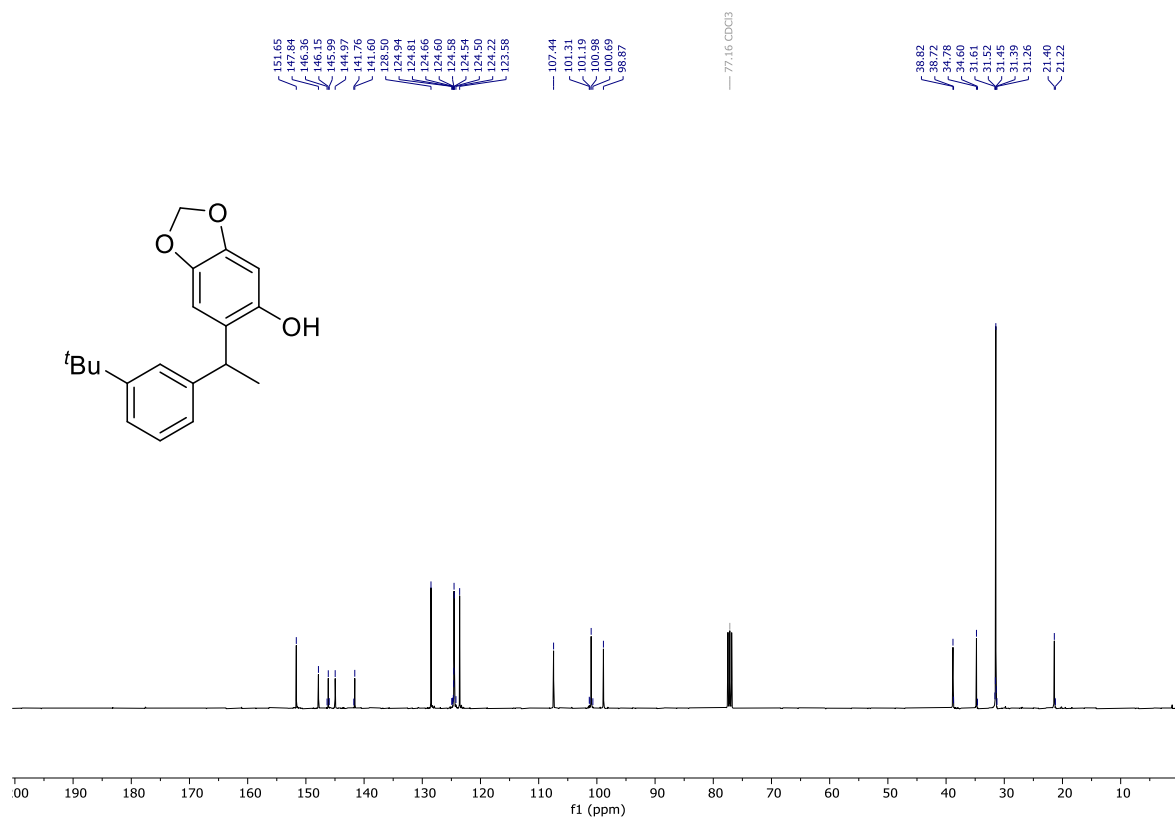



# <sup>1</sup>H NMR (400 MHz, CDCl<sub>3</sub>)

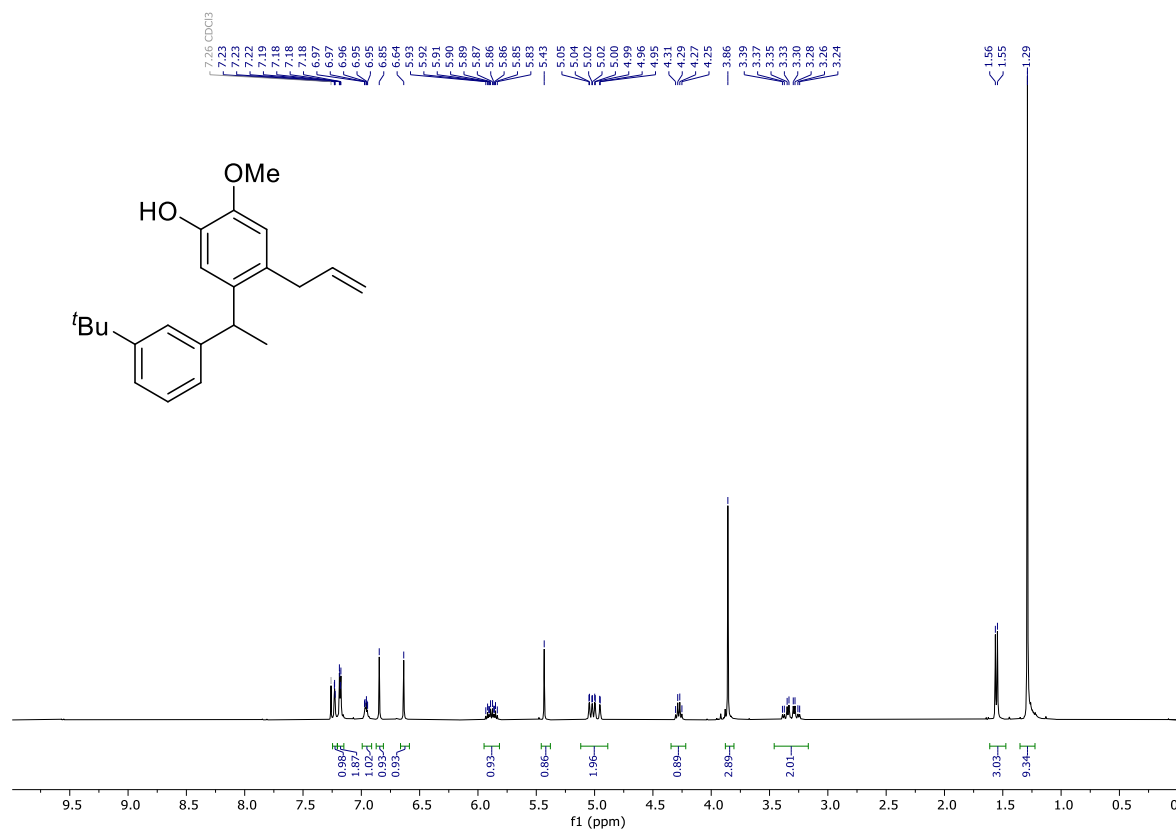

# <sup>13</sup>C NMR (101 MHz, CDCl<sub>3</sub>)

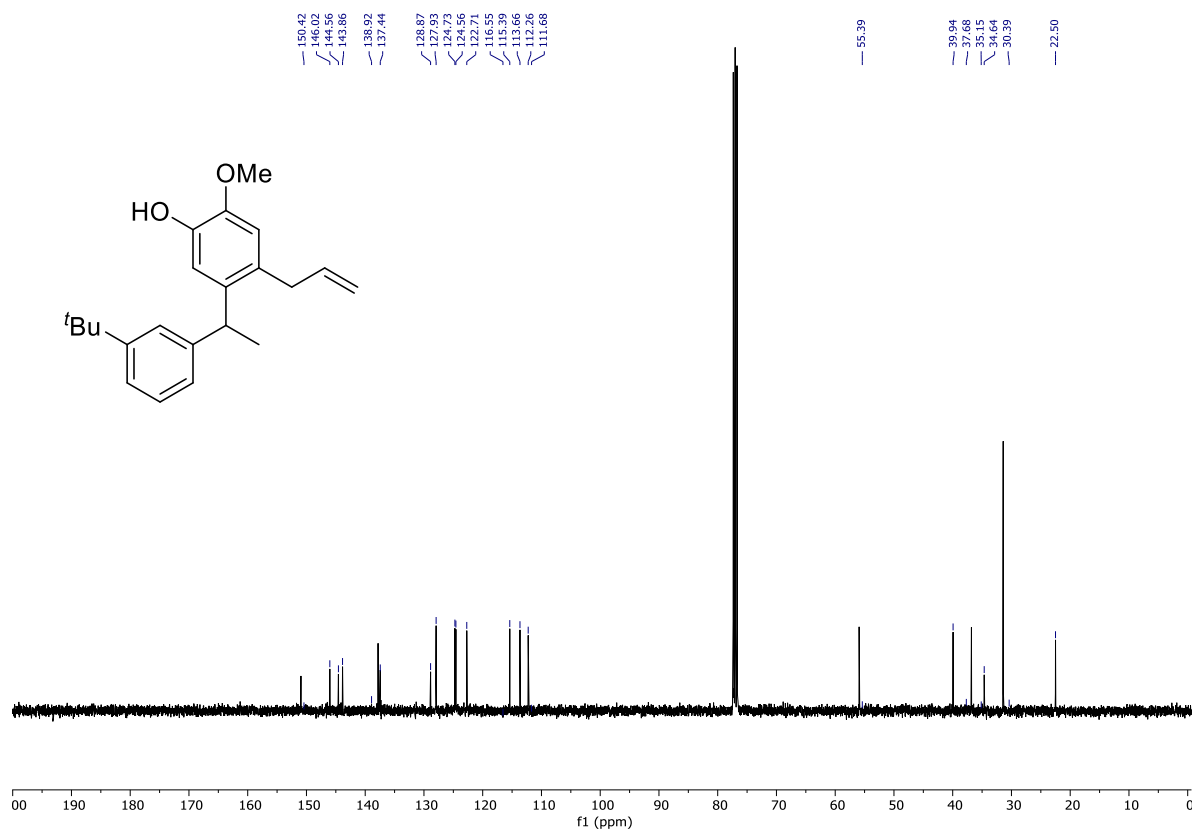

# <sup>1</sup>H NMR (400 MHz, CDCl<sub>3</sub>)

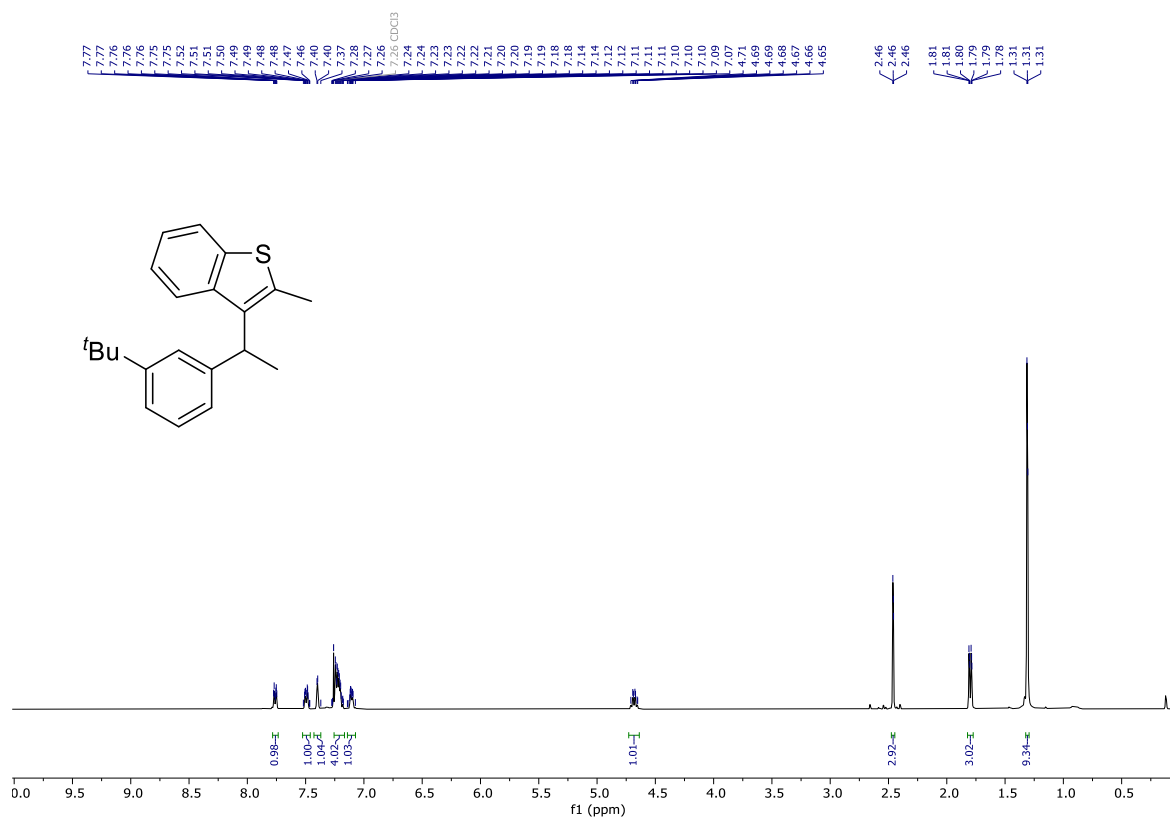

# <sup>13</sup>C NMR (101 MHz, CDCl<sub>3</sub>)

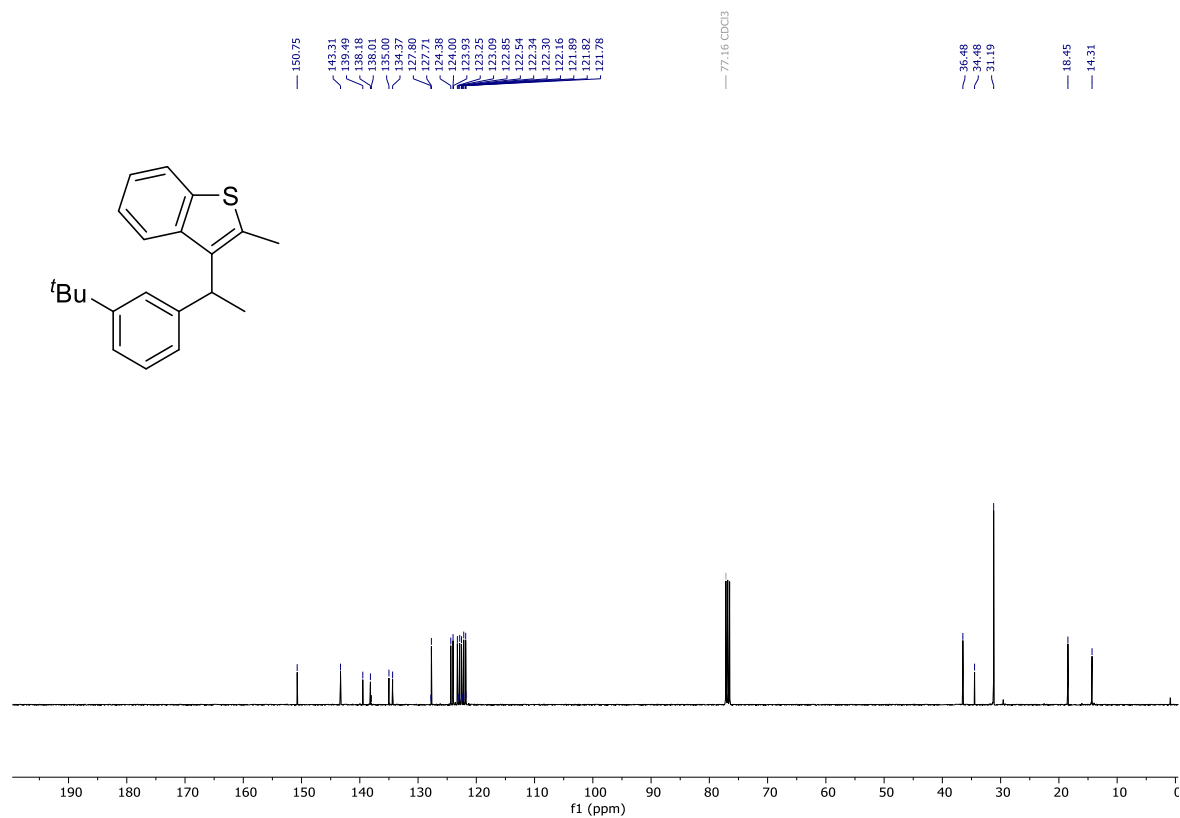

# <sup>1</sup>H NMR (400 MHz, CDCl<sub>3</sub>)

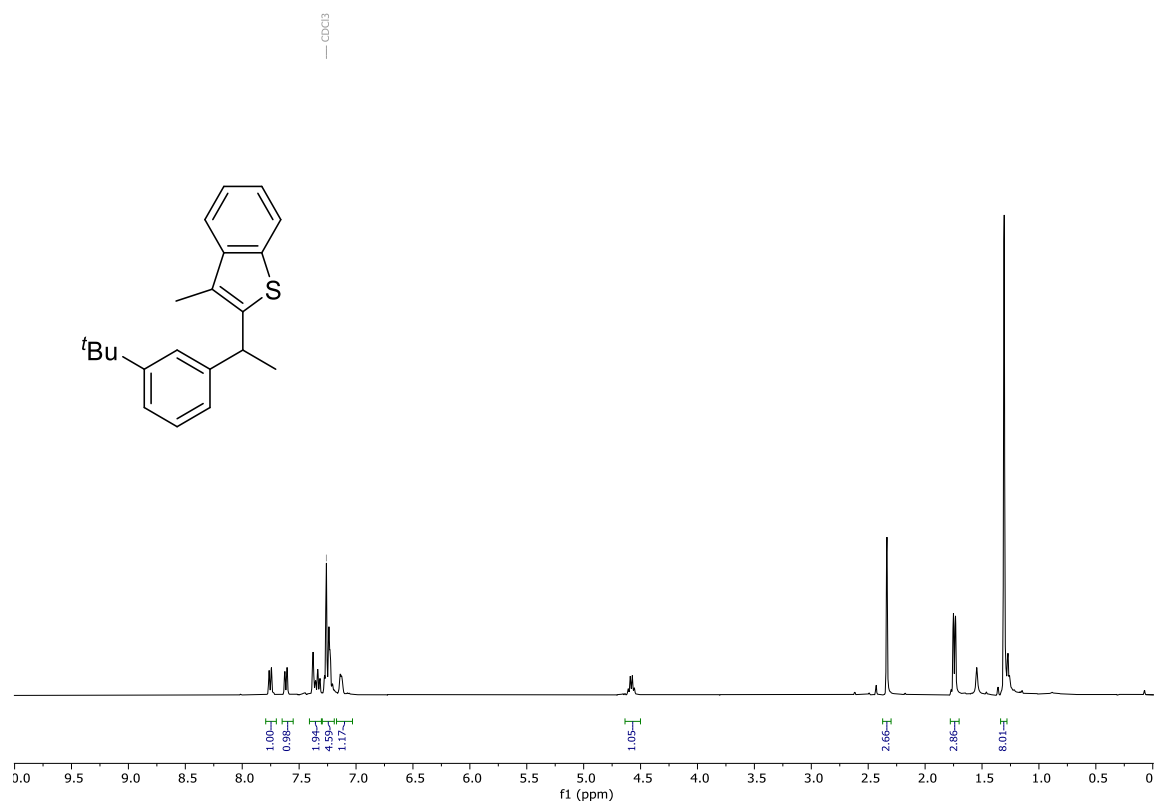

# <sup>13</sup>C NMR (101 MHz, CDCl<sub>3</sub>)

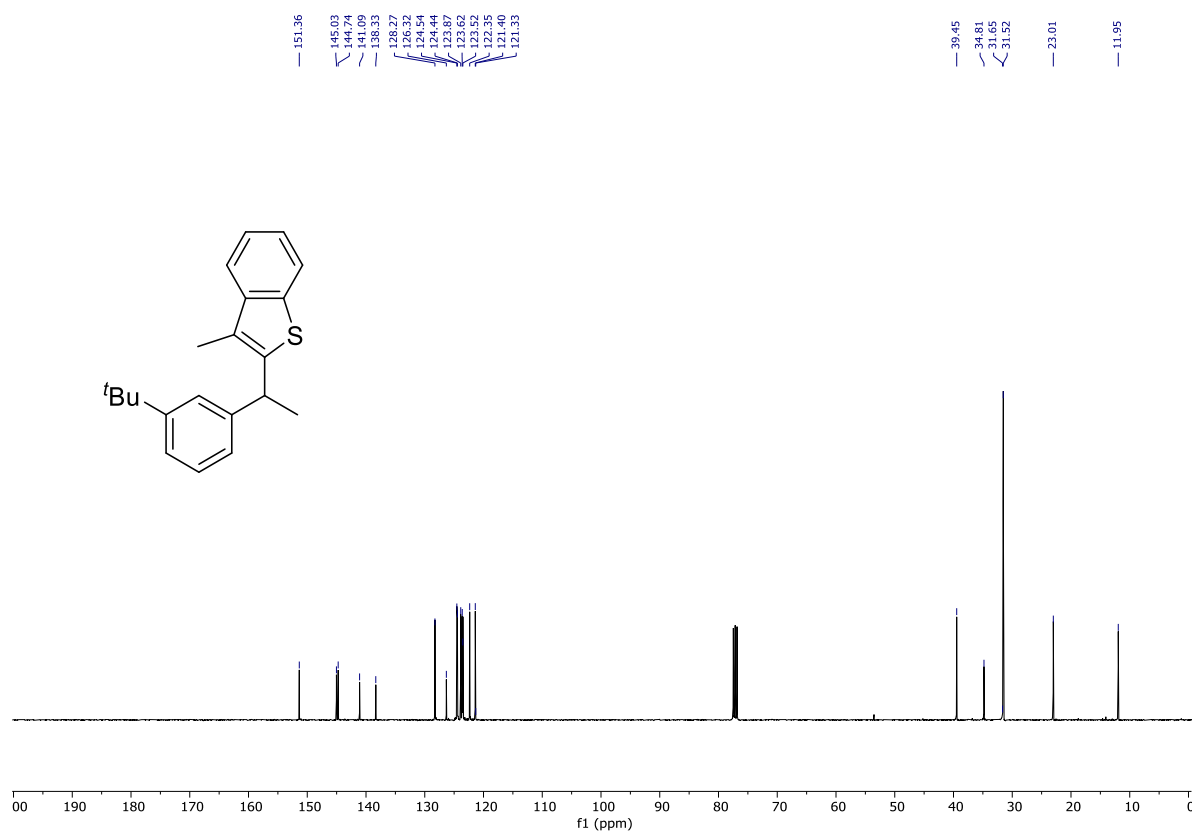

# <sup>1</sup>H NMR (400 MHz, CDCl<sub>3</sub>)

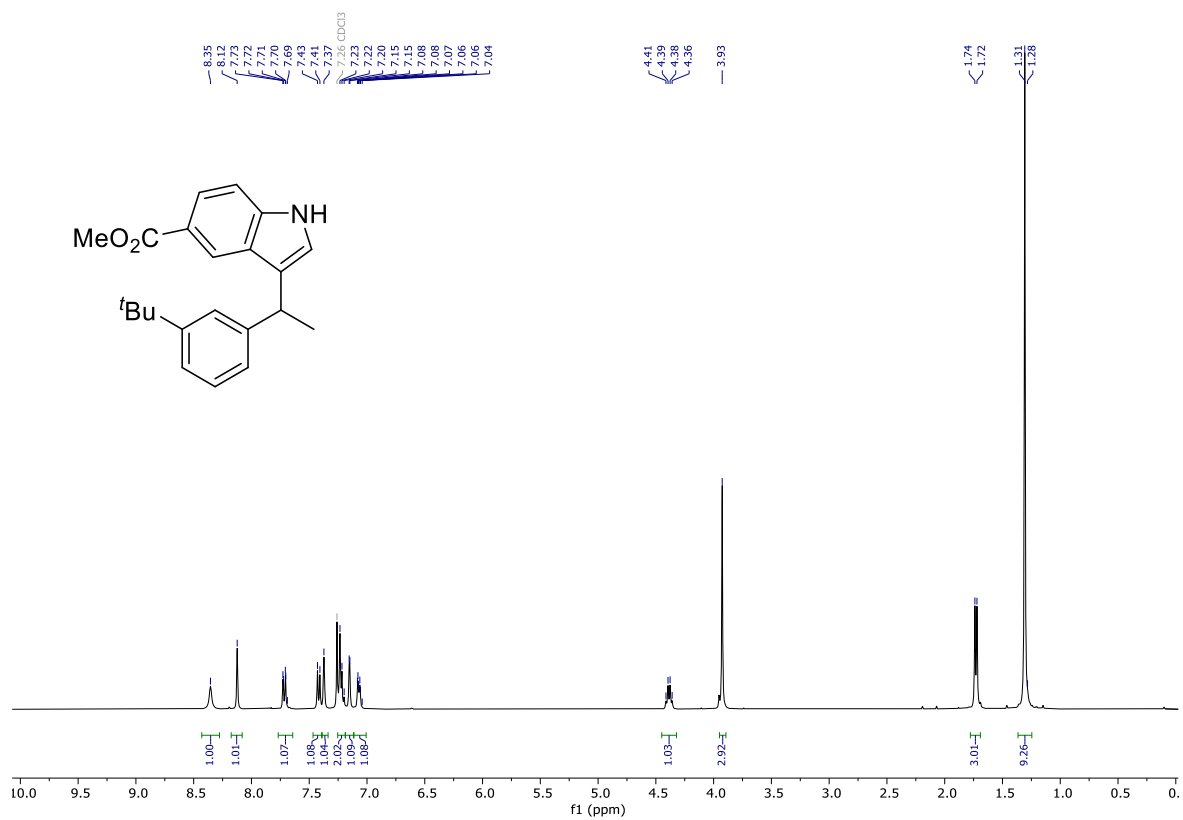

# <sup>13</sup>C NMR (101 MHz, CDCl<sub>3</sub>)

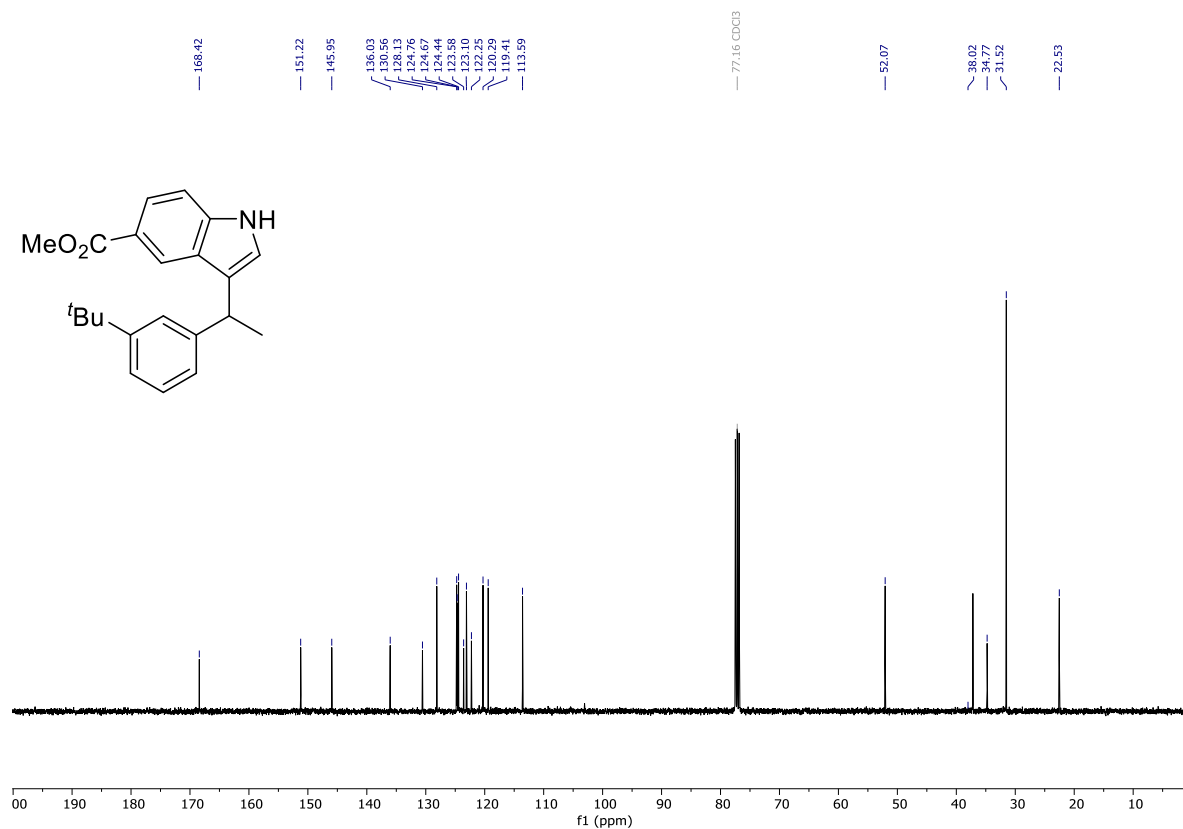

**<sup>1</sup>H NMR (400 MHz, DMSO-*d*<sub>6</sub>)**

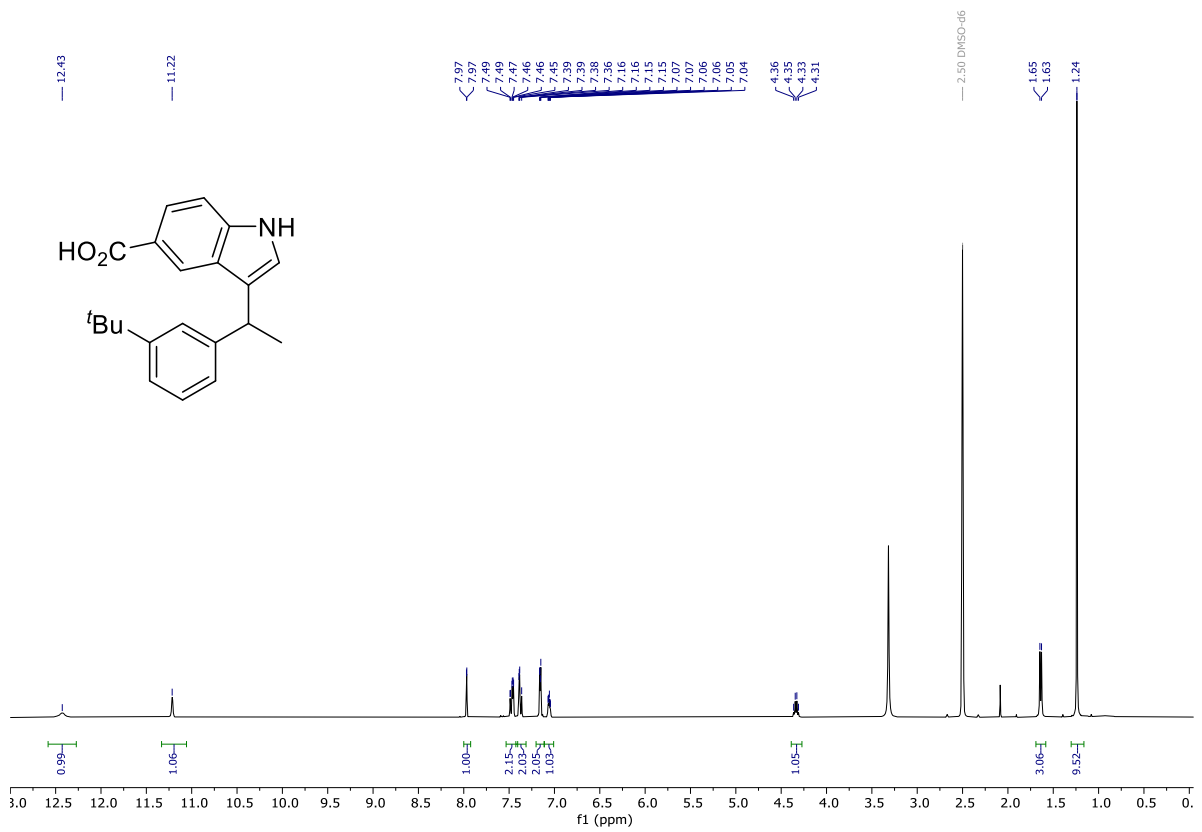

**<sup>13</sup>C NMR (101 MHz, DMSO-*d*<sub>6</sub>)**

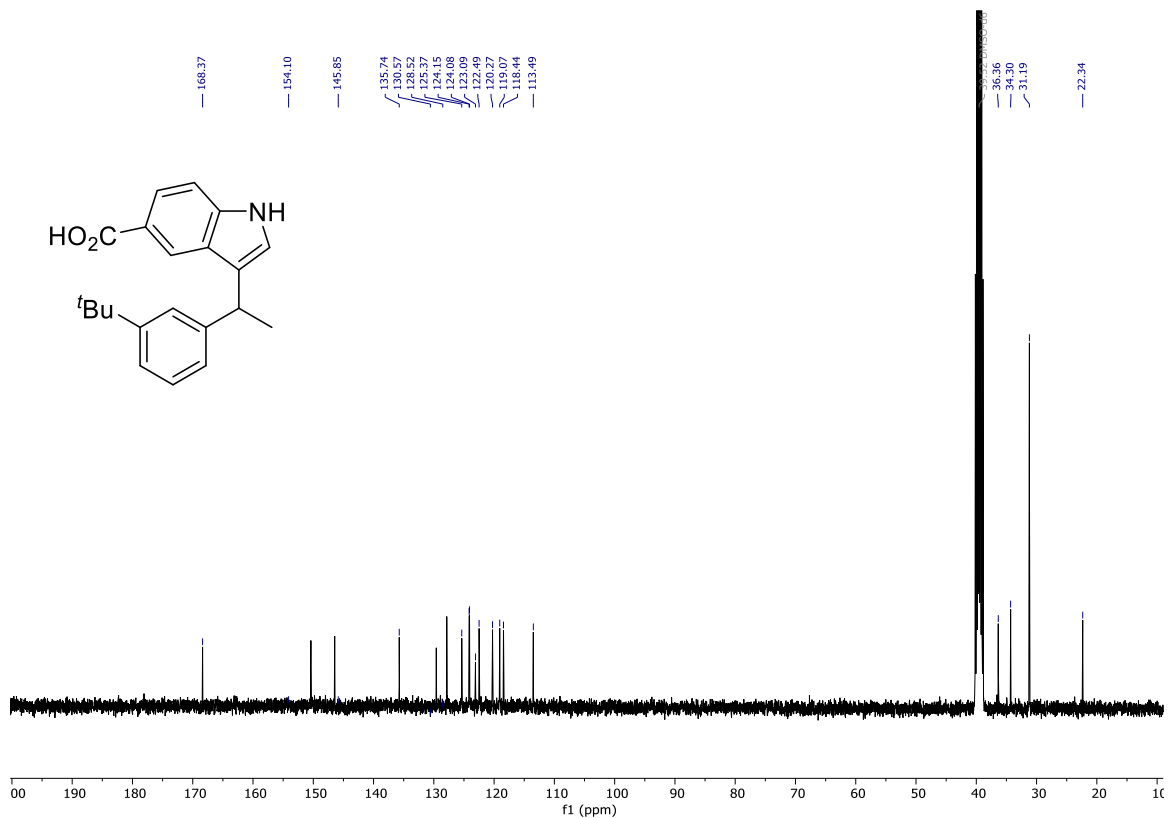

# $^1\text{H}$ NMR (400 MHz, $\text{DMSO-}d_6$ )

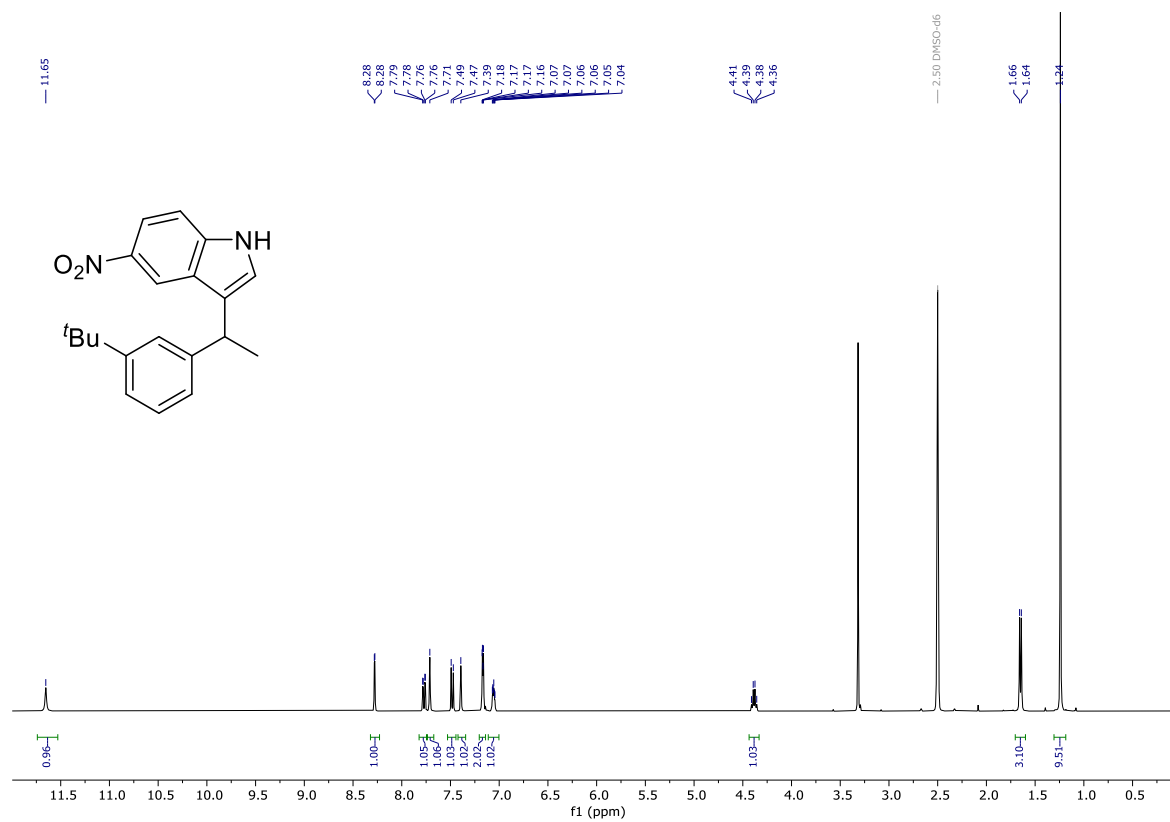

# $^{13}\text{C}$ NMR (101 MHz, $\text{DMSO-}d_6$ )

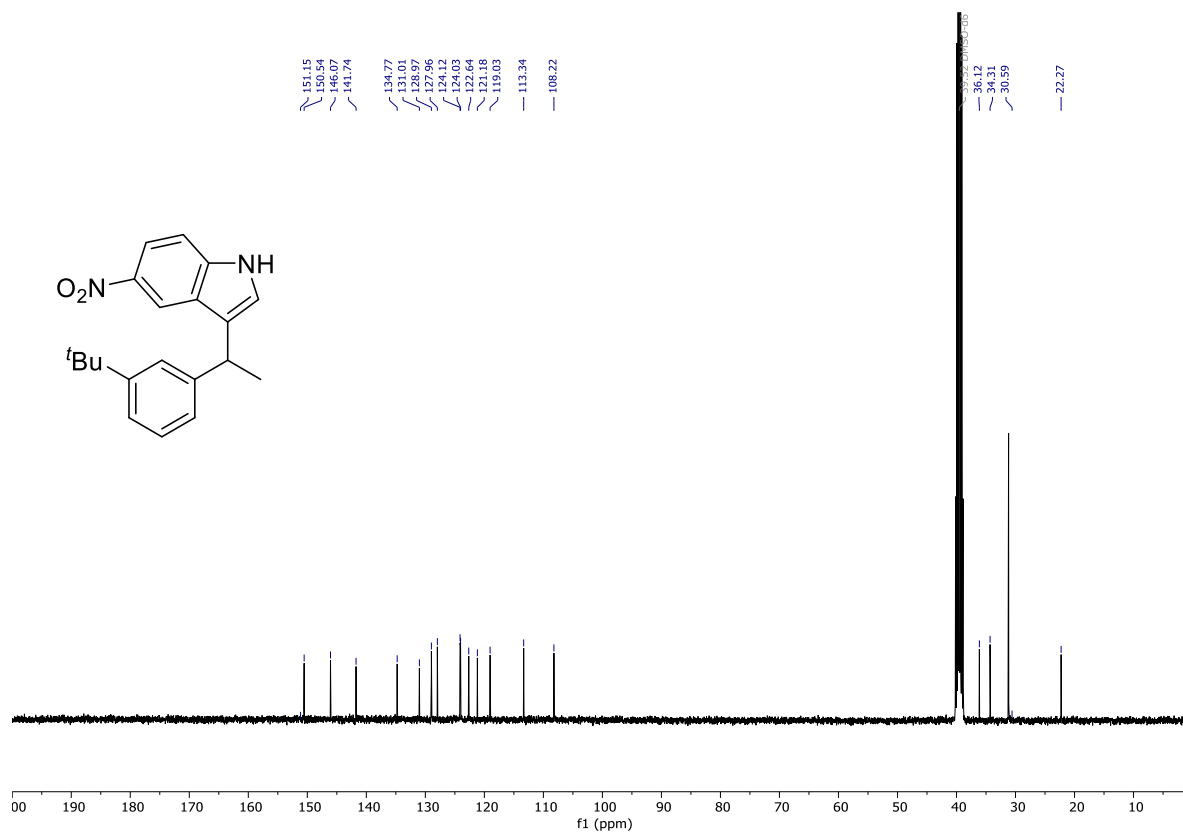

# $^1\text{H}$ NMR (400 MHz, $\text{CDCl}_3$ )

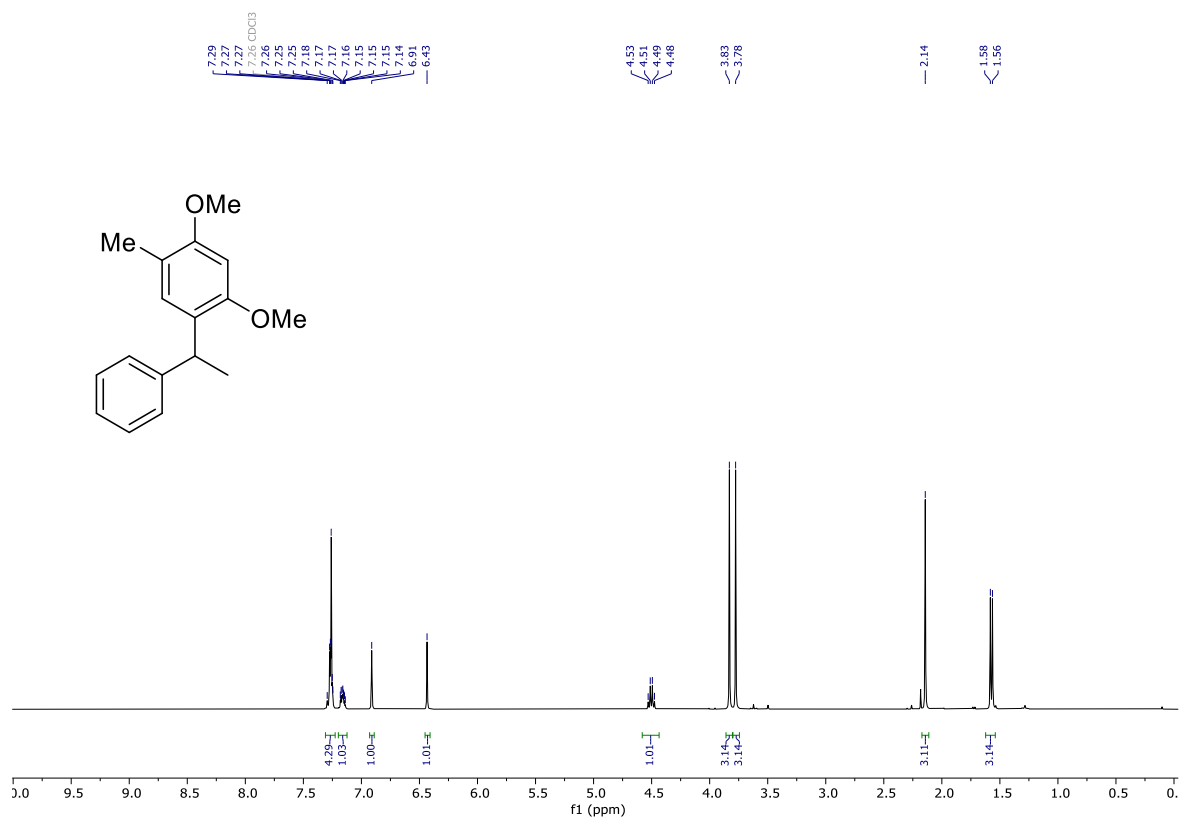

# $^{13}\text{C}$ NMR (101 MHz, $\text{CDCl}_3$ )

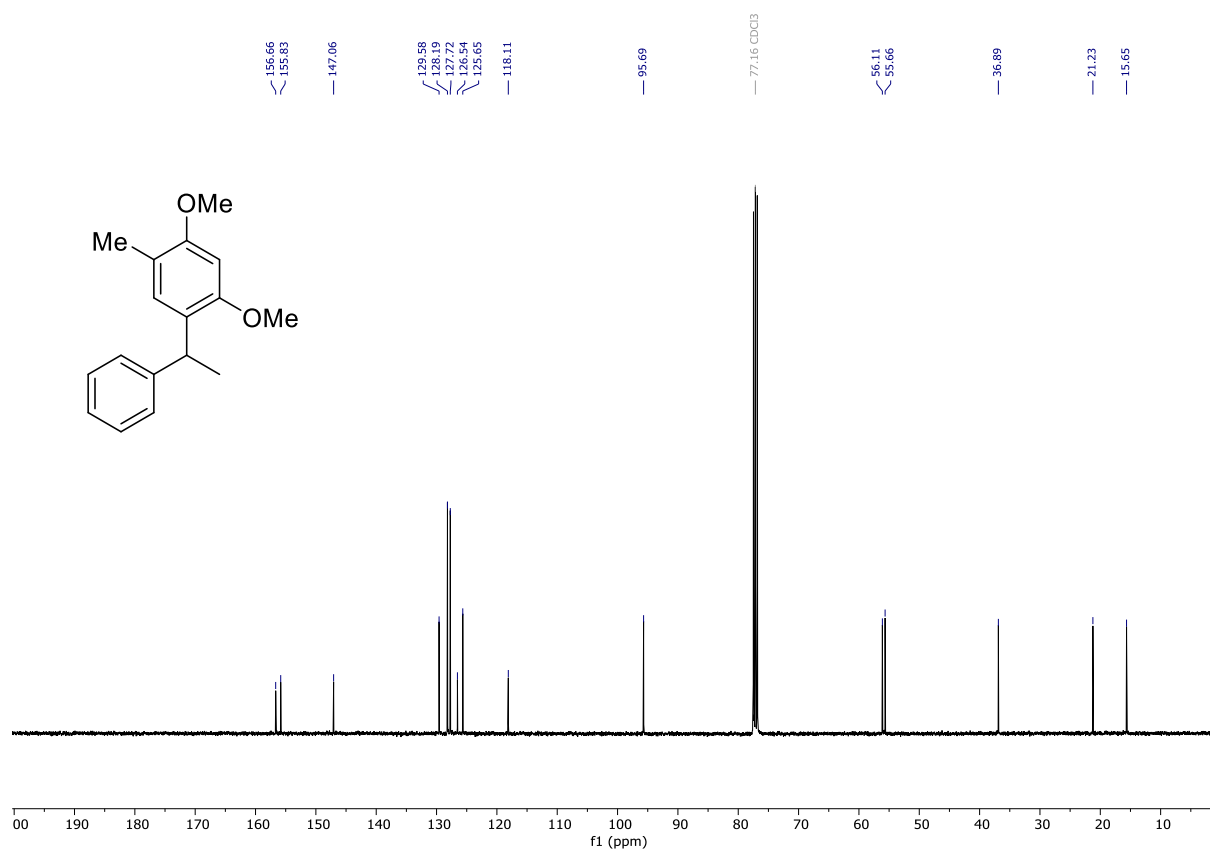

# $^1\text{H}$ NMR (400 MHz, $\text{CDCl}_3$ )

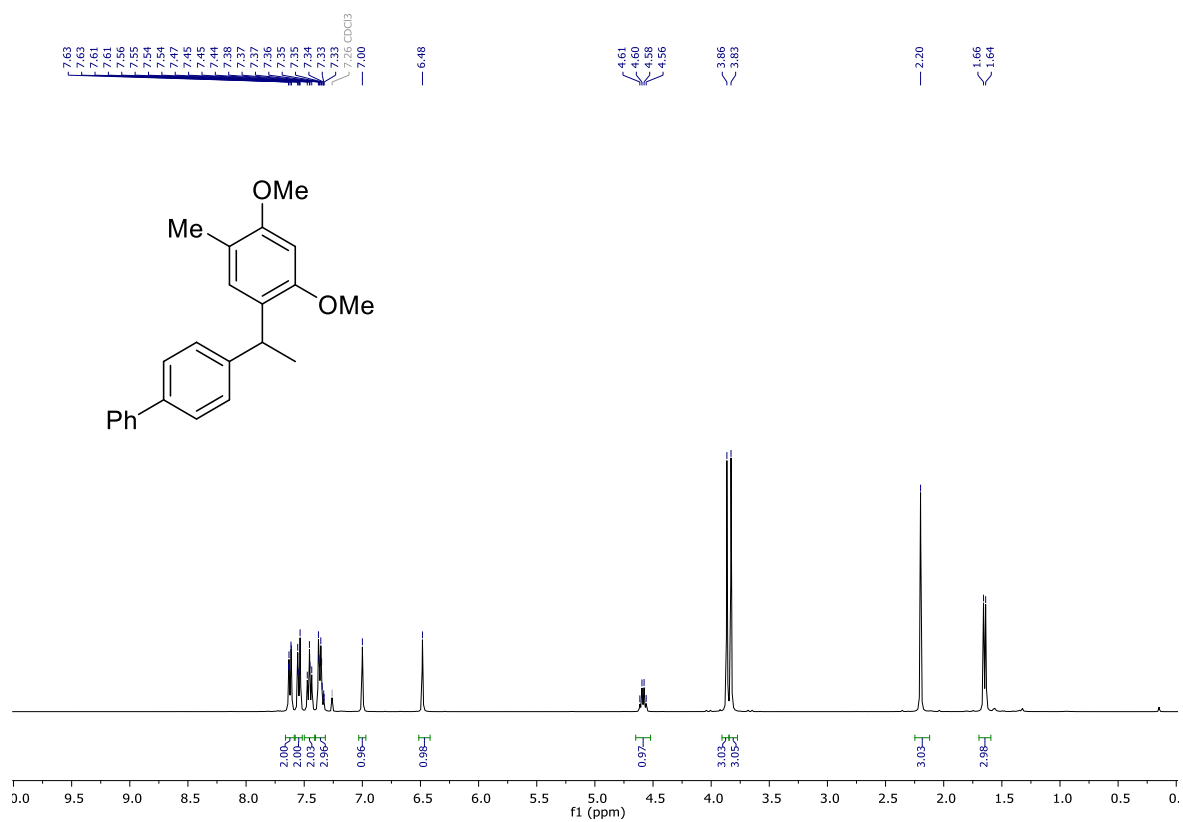

# $^{13}\text{C}$ NMR (101 MHz, $\text{CDCl}_3$ )

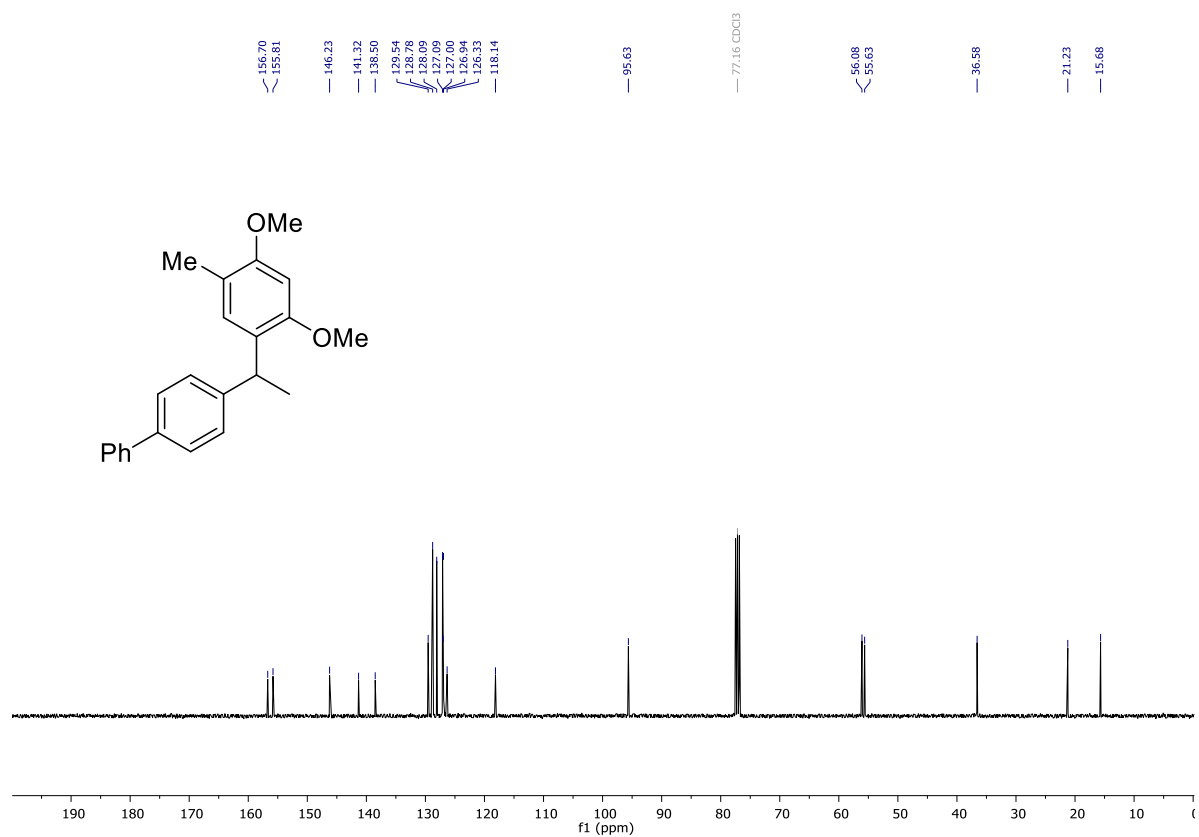



# $^1\text{H}$ NMR (400 MHz, $\text{CDCl}_3$ )

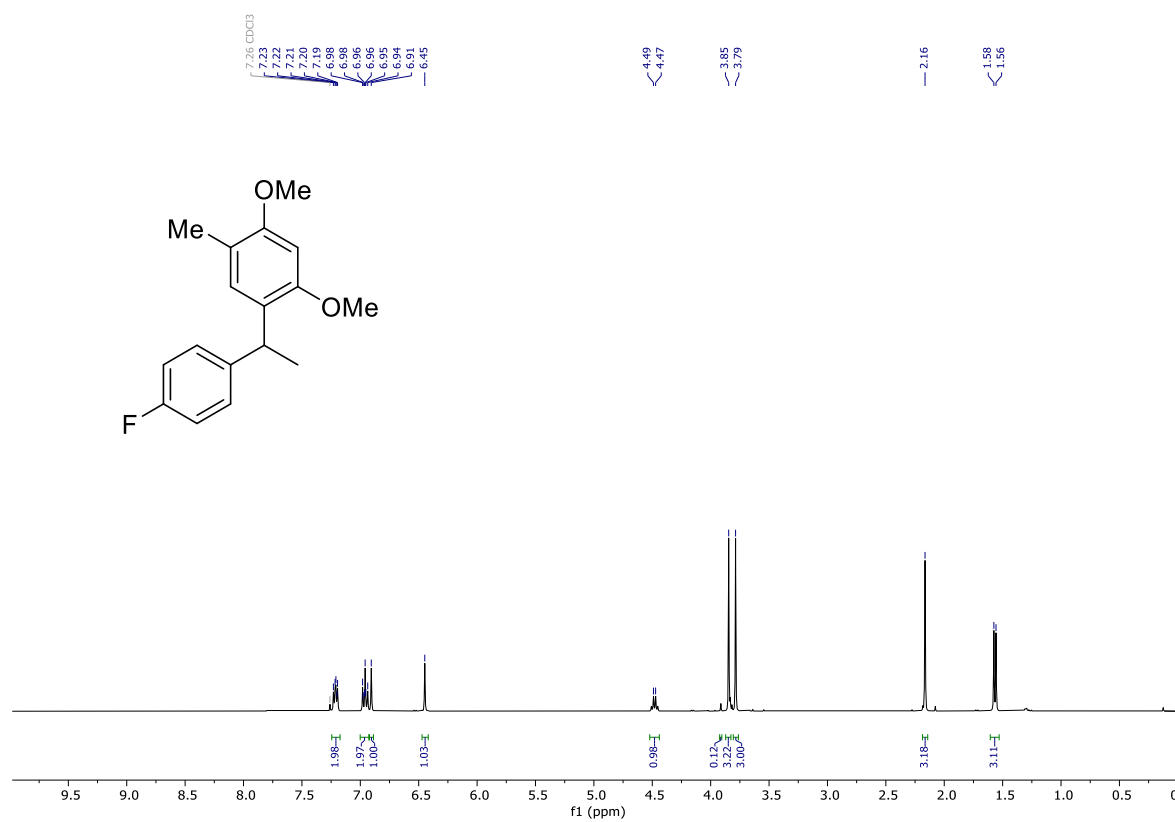

# $^{13}\text{C}$ NMR (101 MHz, $\text{CDCl}_3$ )

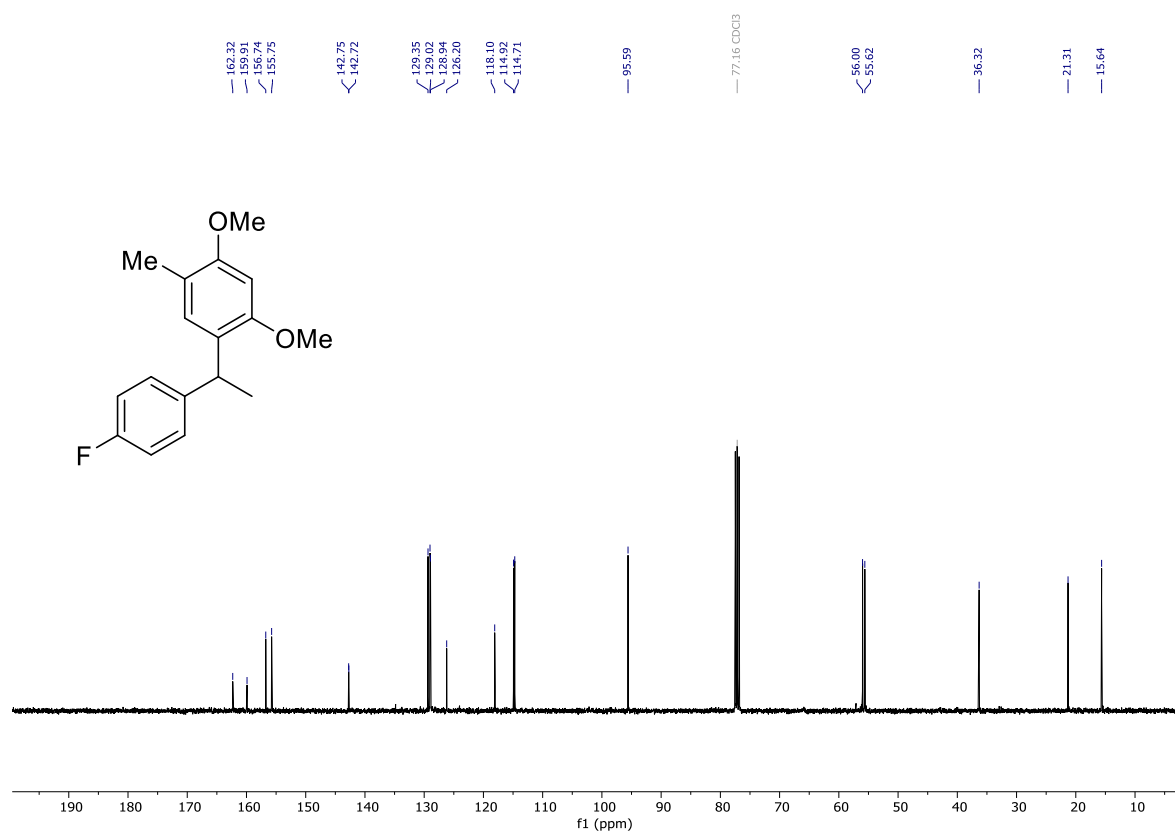

**$^{19}\text{F}$  NMR (376 MHz,  $\text{CDCl}_3$ )**

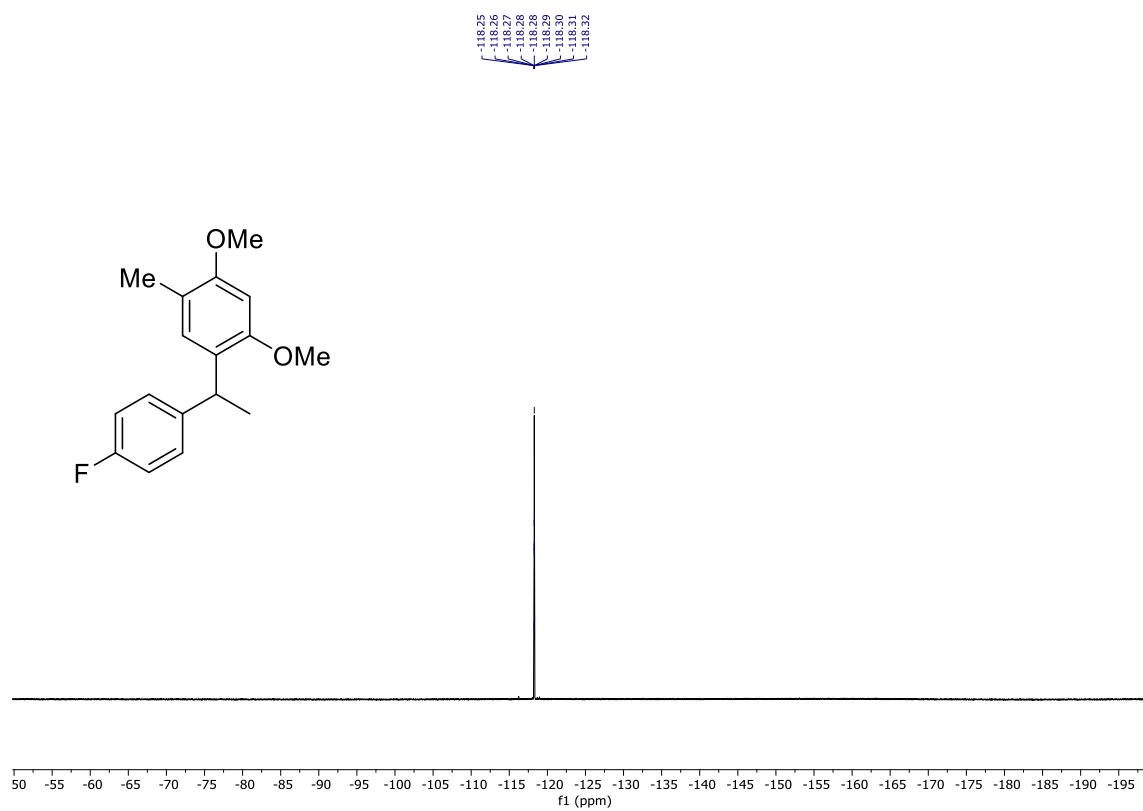

**<sup>1</sup>H NMR (400 MHz, CDCl<sub>3</sub>)**

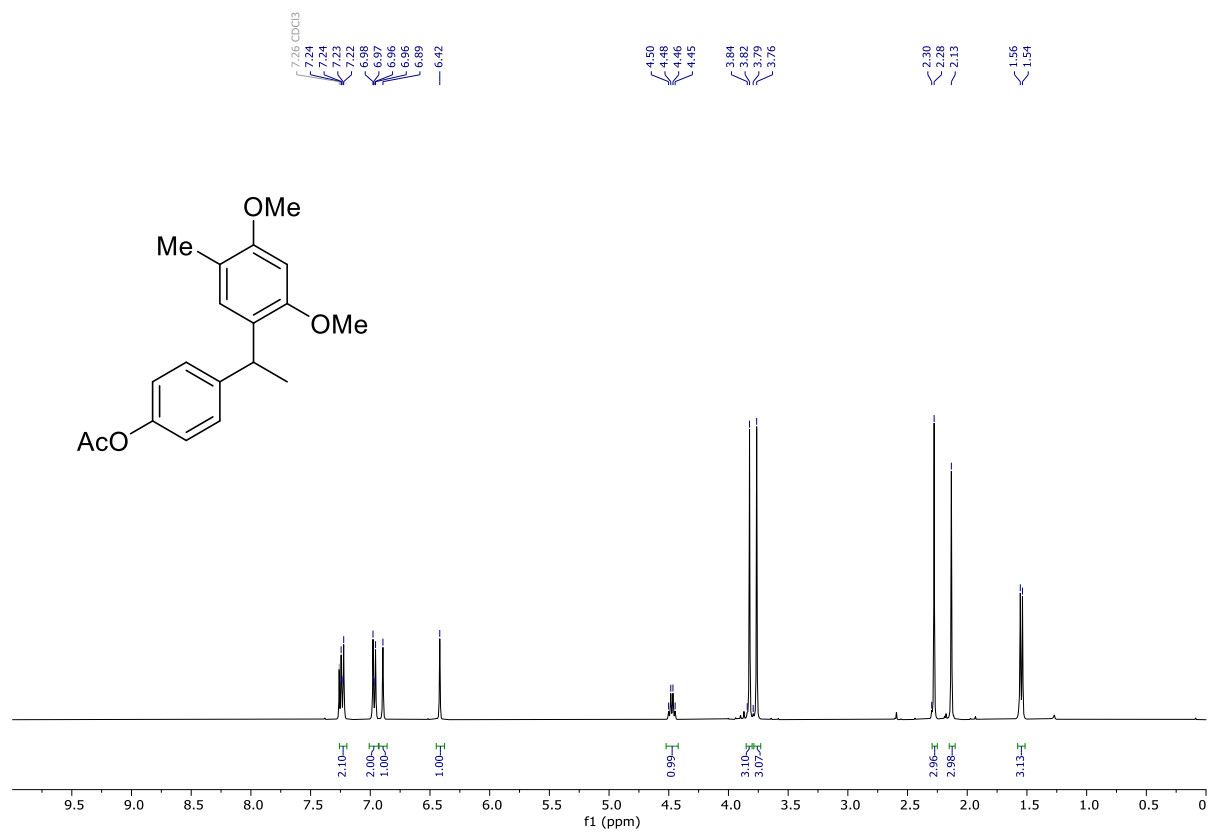

**<sup>13</sup>C NMR (101 MHz, CDCl<sub>3</sub>)**

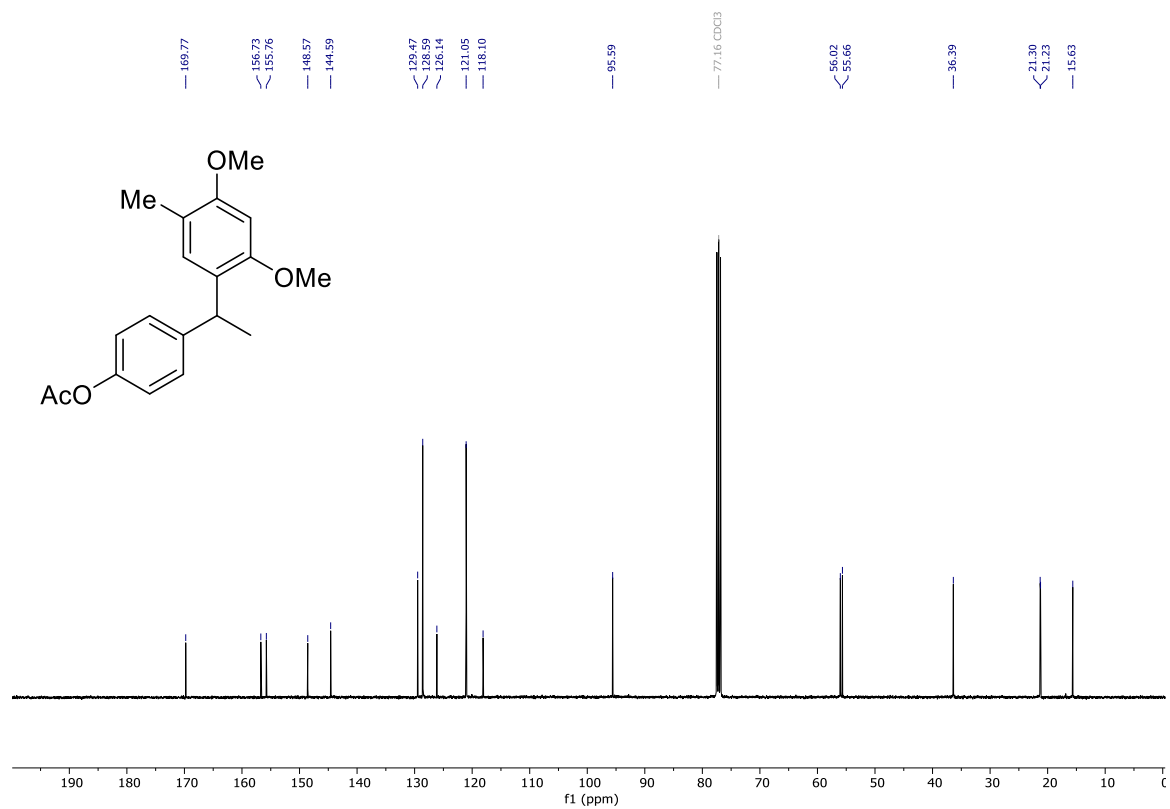

**<sup>1</sup>H NMR (400 MHz, CDCl<sub>3</sub>)**

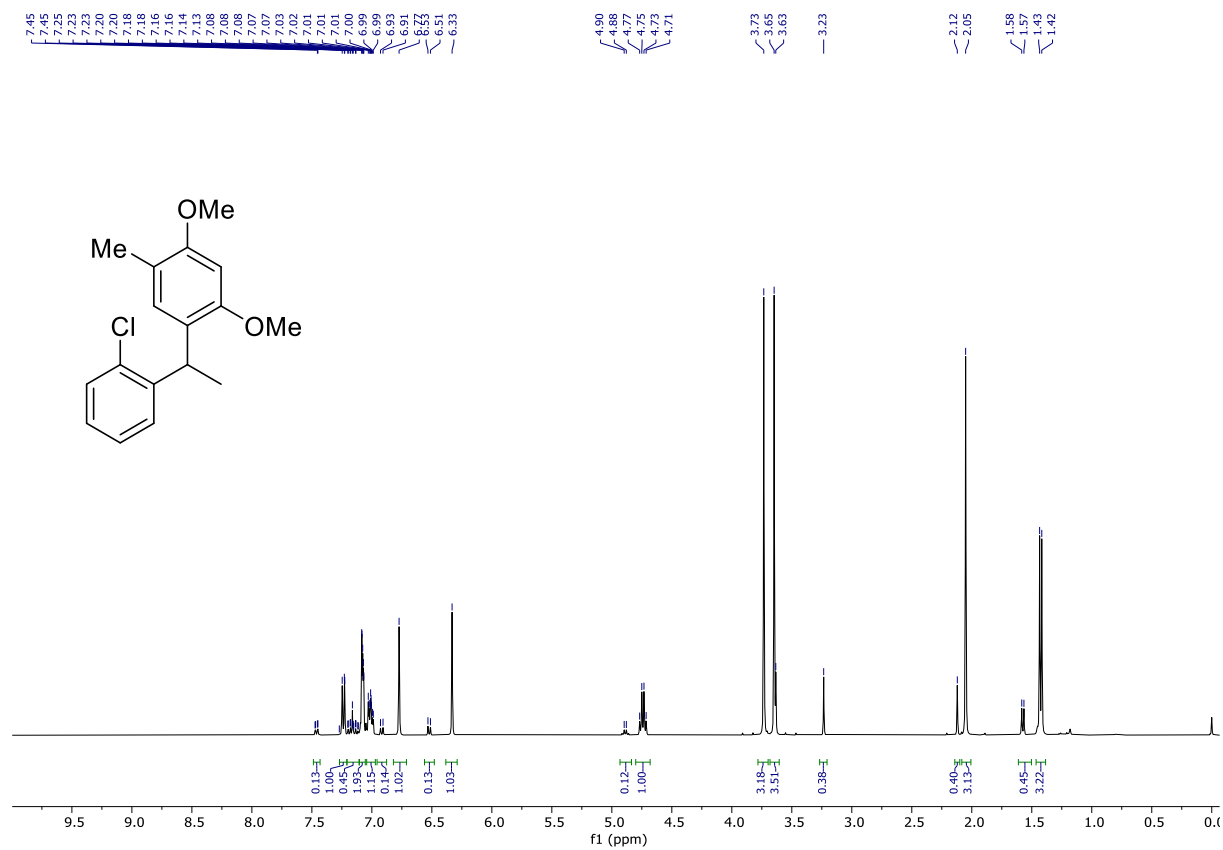

**<sup>13</sup>C NMR (101 MHz, CDCl<sub>3</sub>)**

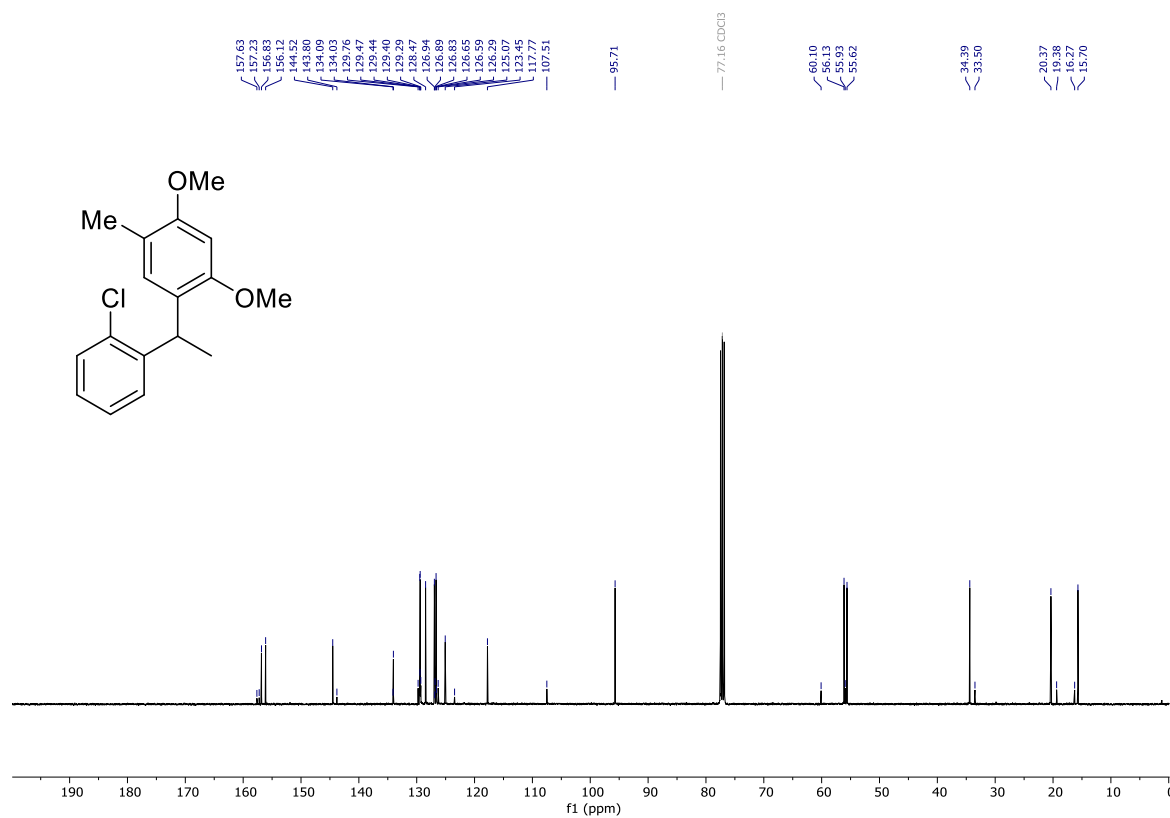

# <sup>1</sup>H NMR (400 MHz, CDCl<sub>3</sub>)

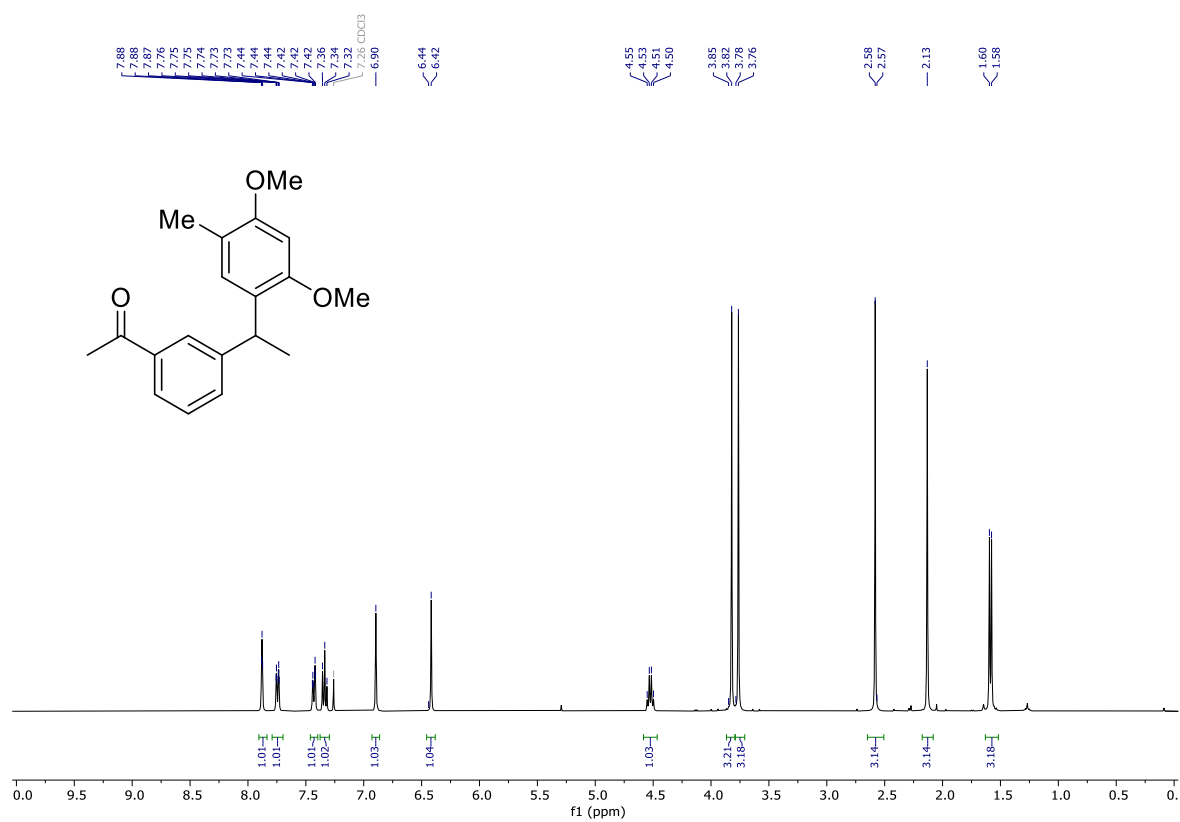

# <sup>13</sup>C NMR (101 MHz, CDCl<sub>3</sub>)

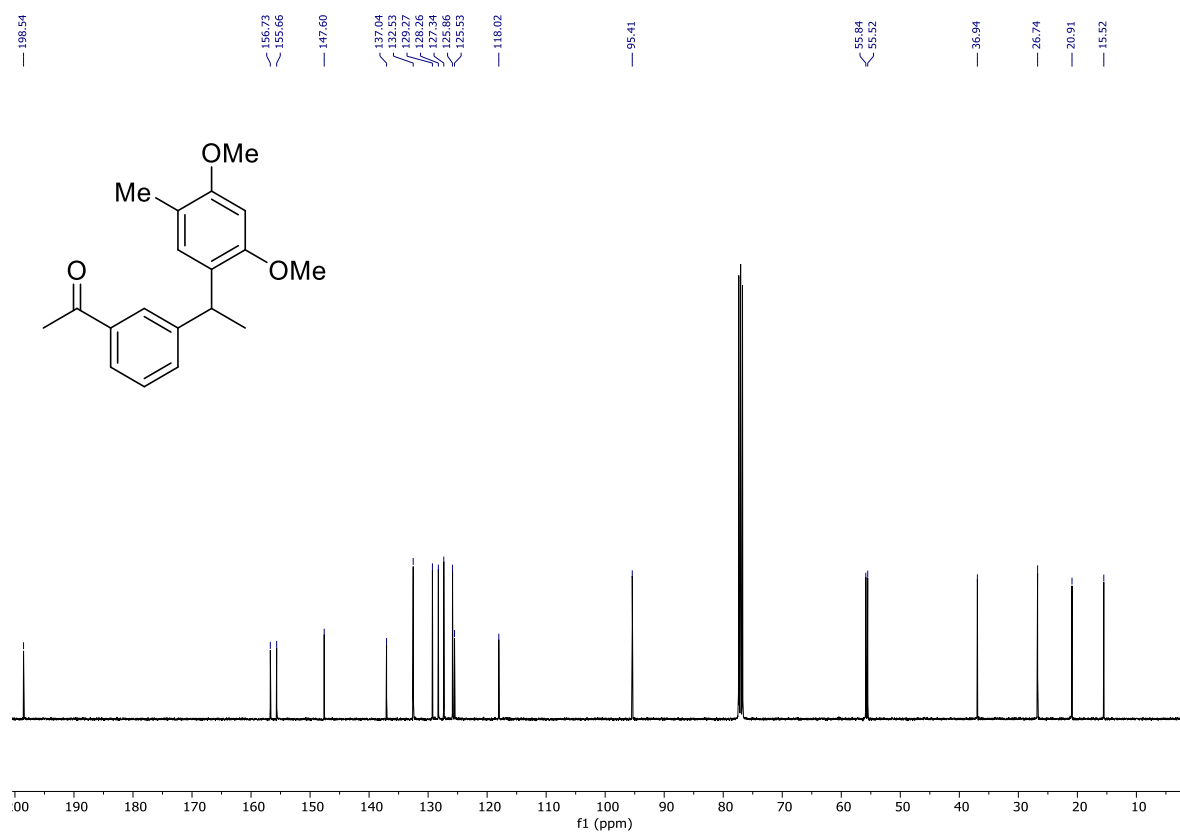

# $^1\text{H}$ NMR (400 MHz, $\text{CDCl}_3$ )

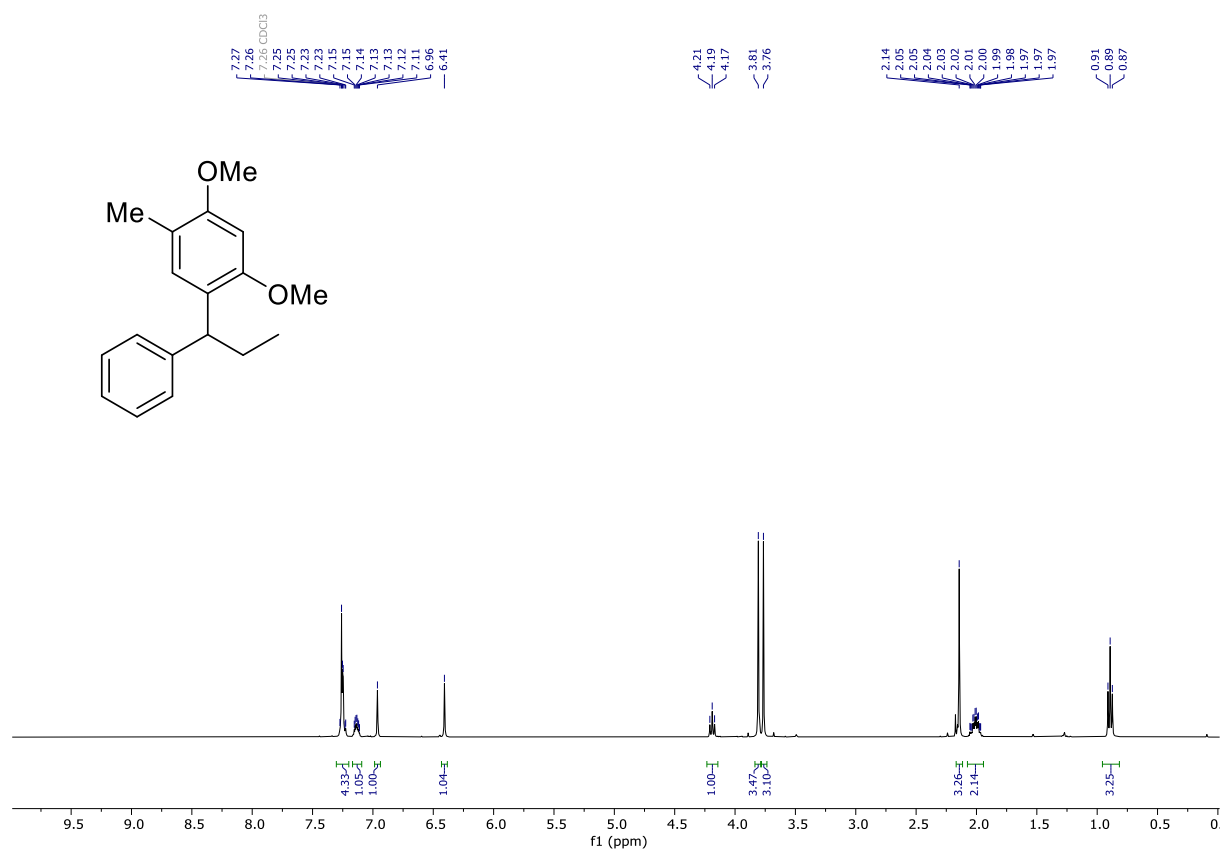

# $^{13}\text{C}$ NMR (101 MHz, $\text{CDCl}_3$ )

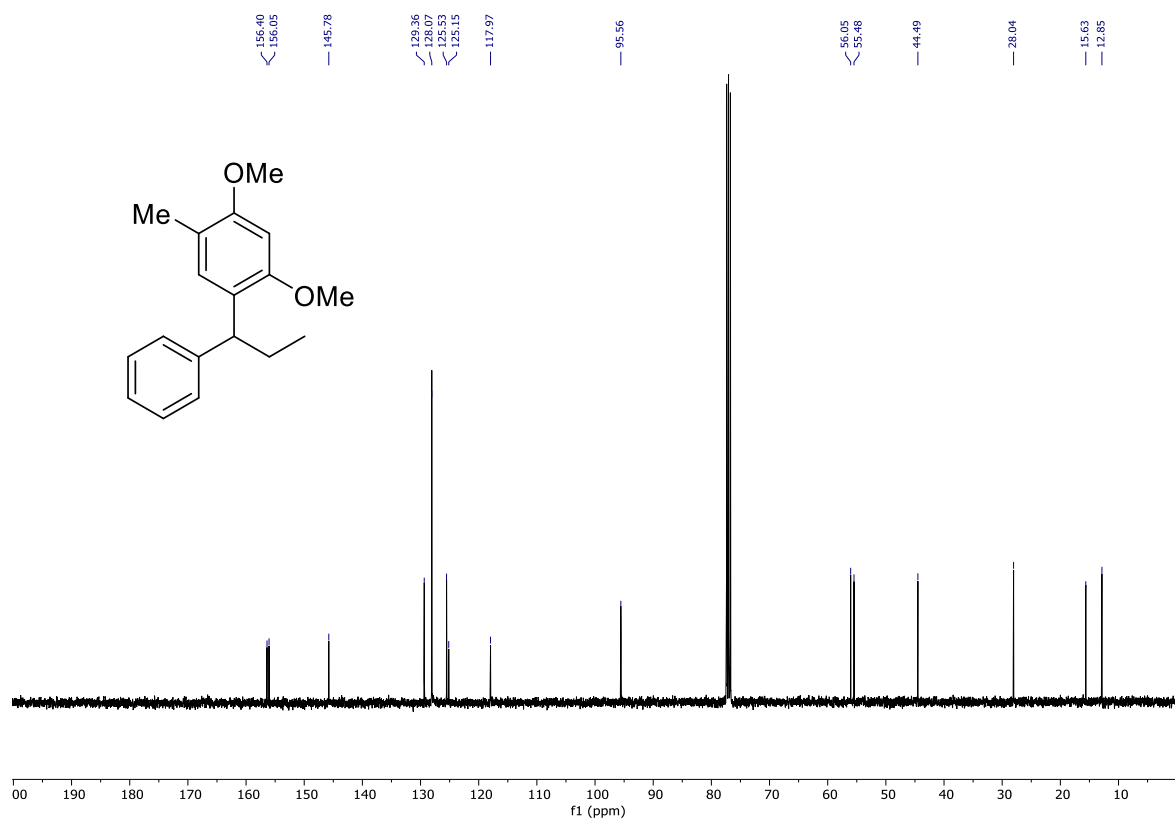

# <sup>1</sup>H NMR (400 MHz, CDCl<sub>3</sub>)

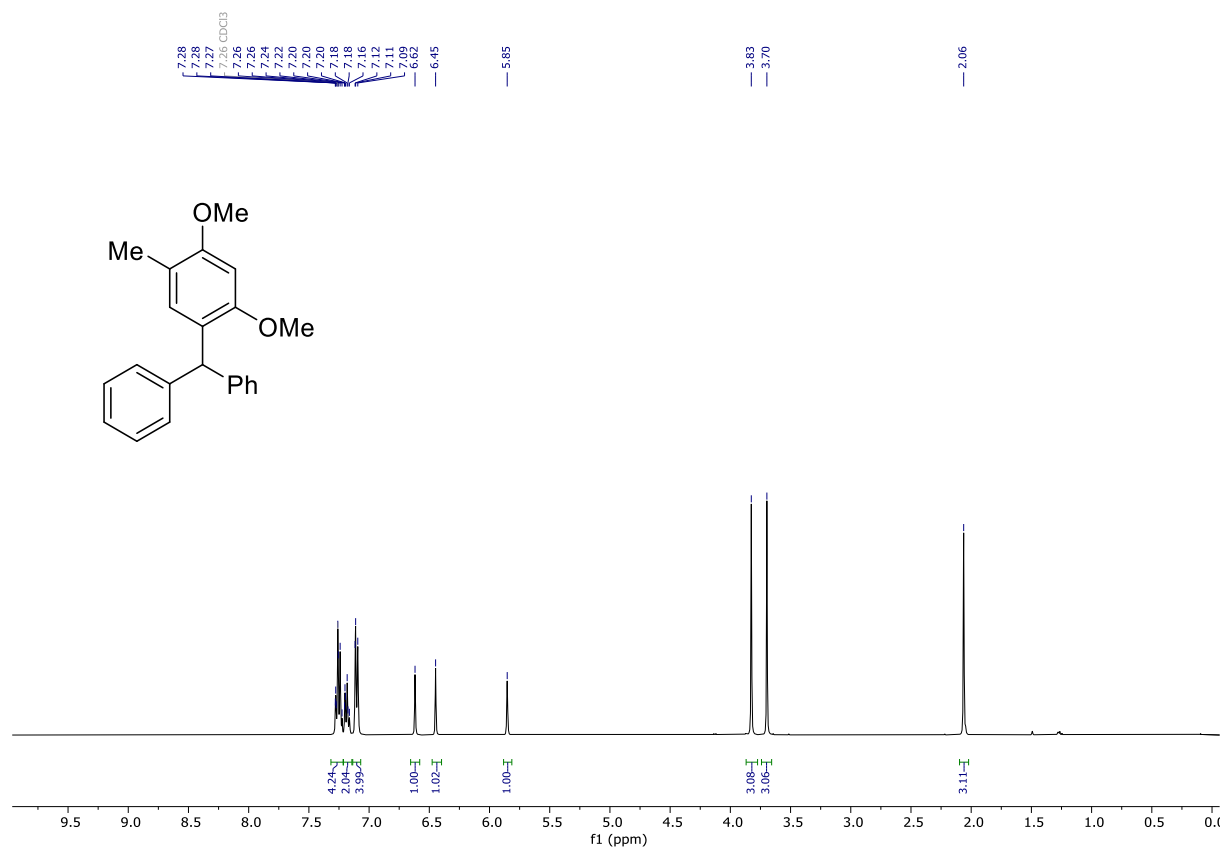

# <sup>13</sup>C NMR (101 MHz, CDCl<sub>3</sub>)

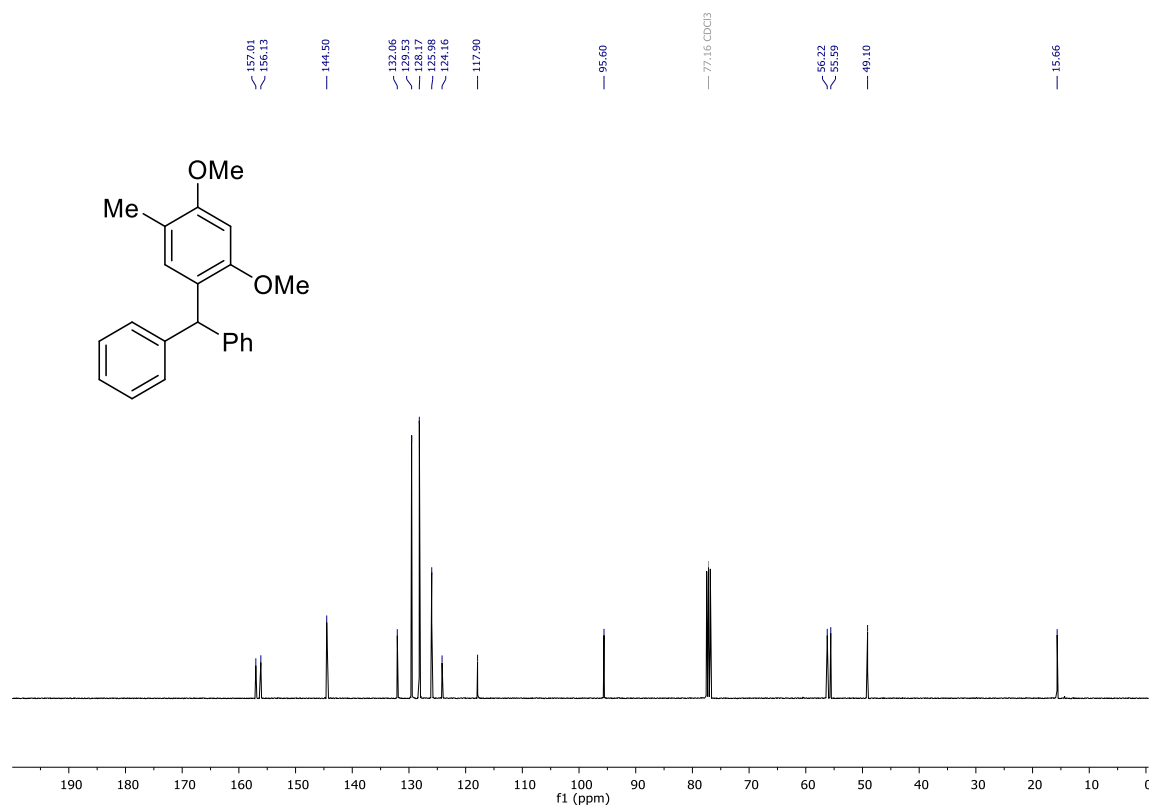

# $^1\text{H}$ NMR (400 MHz, $\text{CDCl}_3$ )

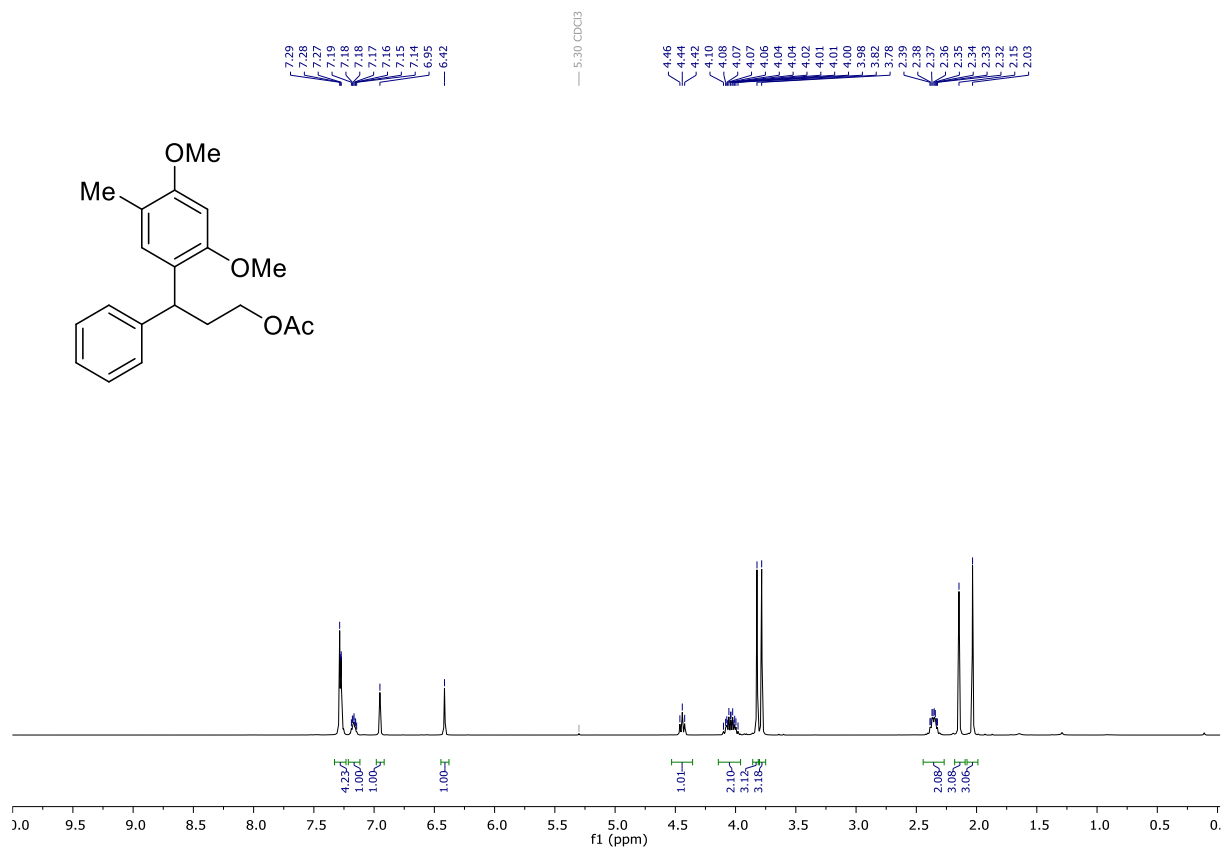

# $^{13}\text{C}$ NMR (101 MHz, $\text{CDCl}_3$ )

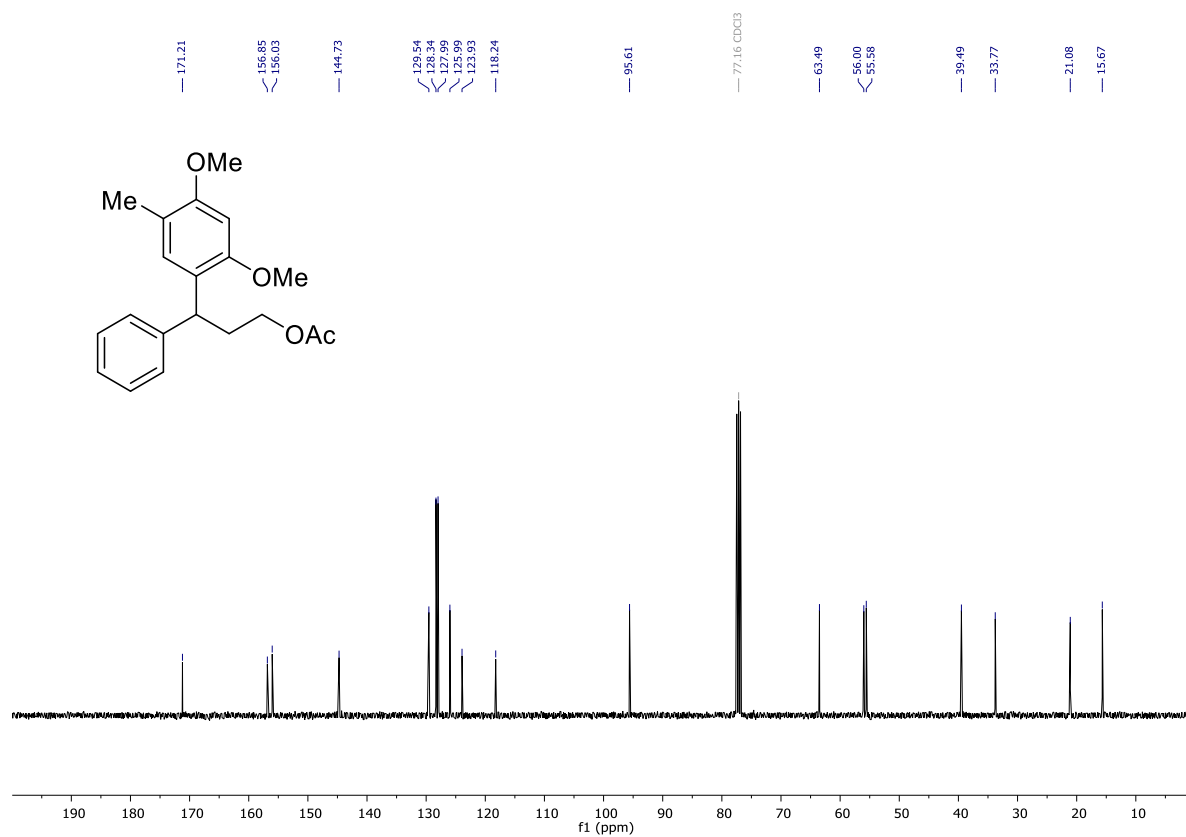



# <sup>1</sup>H NMR (400 MHz, CDCl<sub>3</sub>)

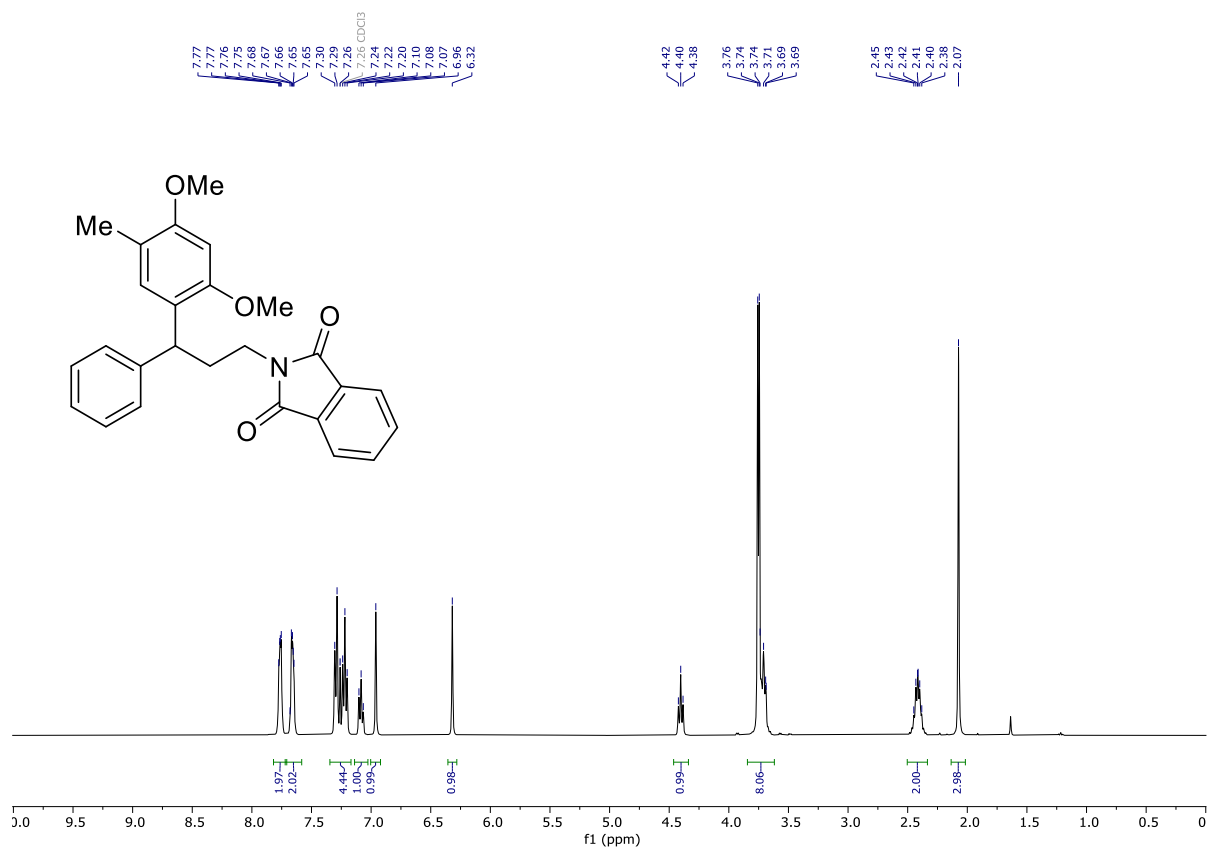

# <sup>13</sup>C NMR (101 MHz, CDCl<sub>3</sub>)

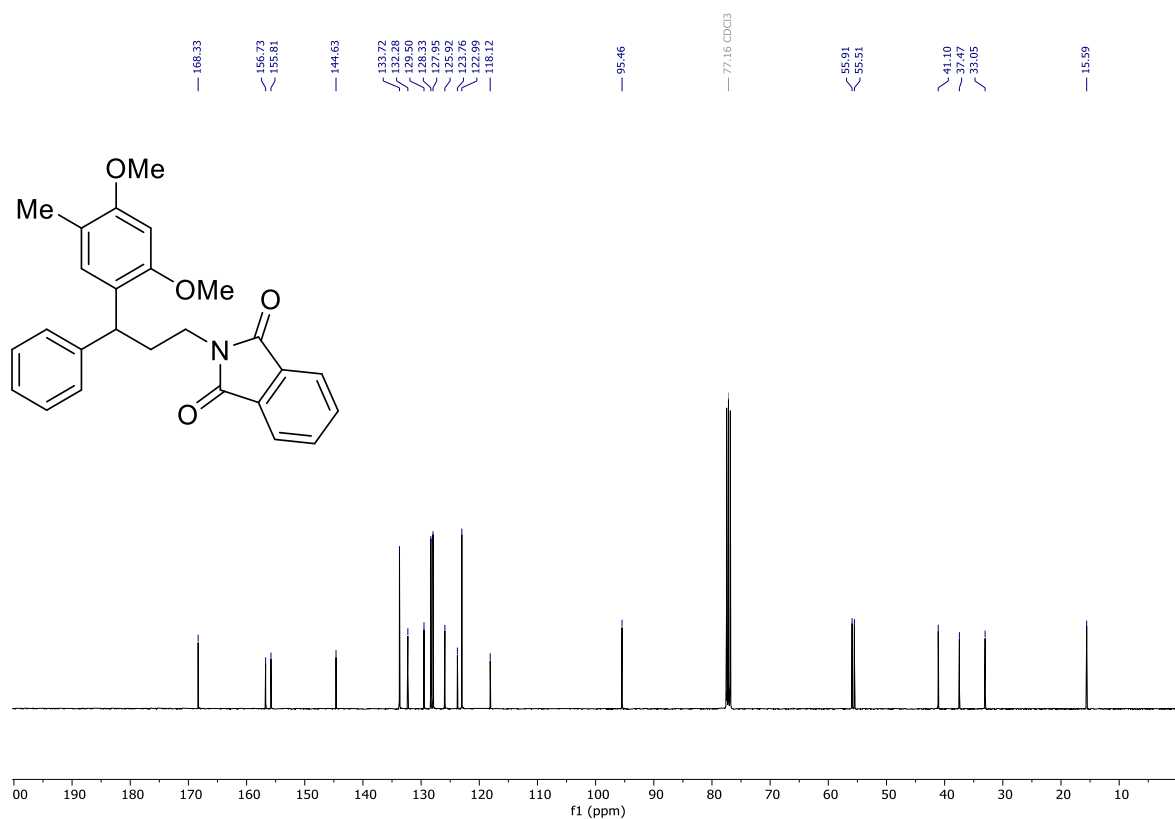

# <sup>1</sup>H NMR (400 MHz, CDCl<sub>3</sub>)

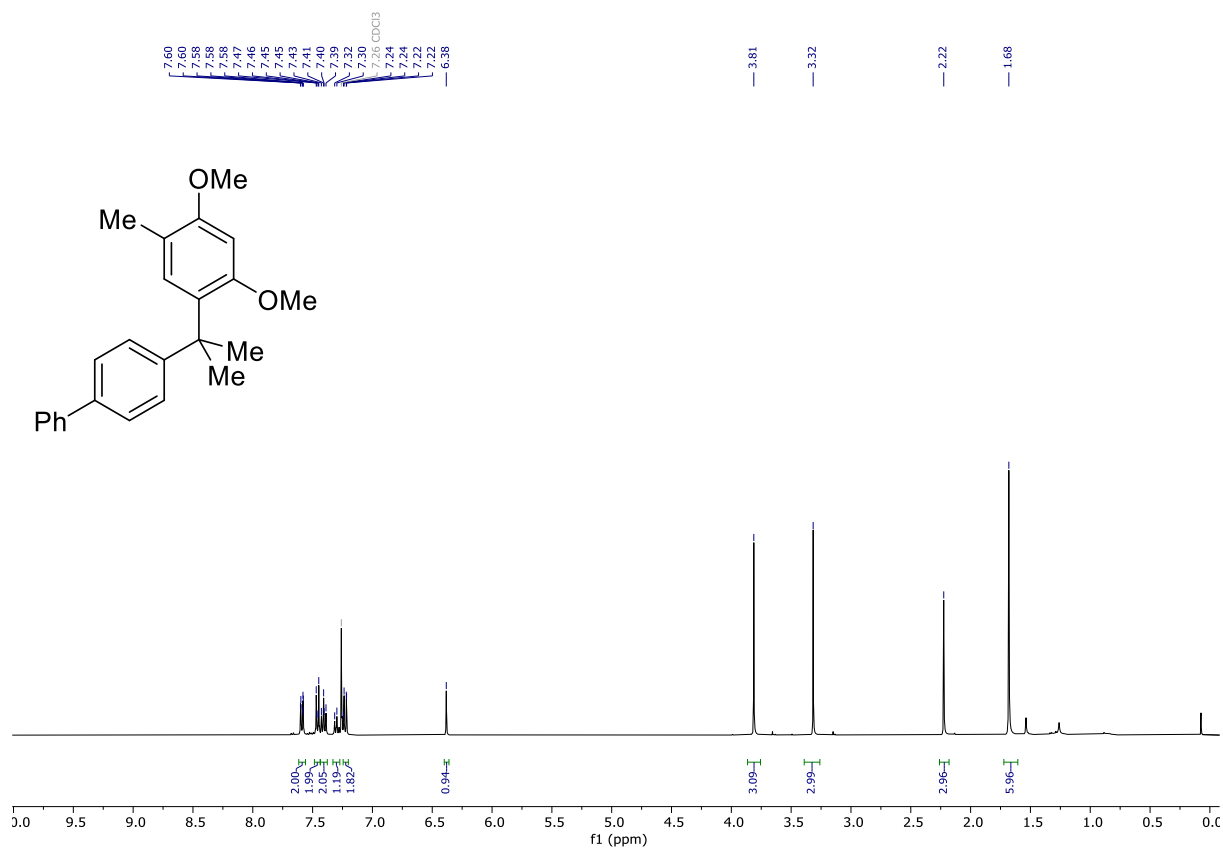

# <sup>13</sup>C NMR (126 MHz, CDCl<sub>3</sub>)

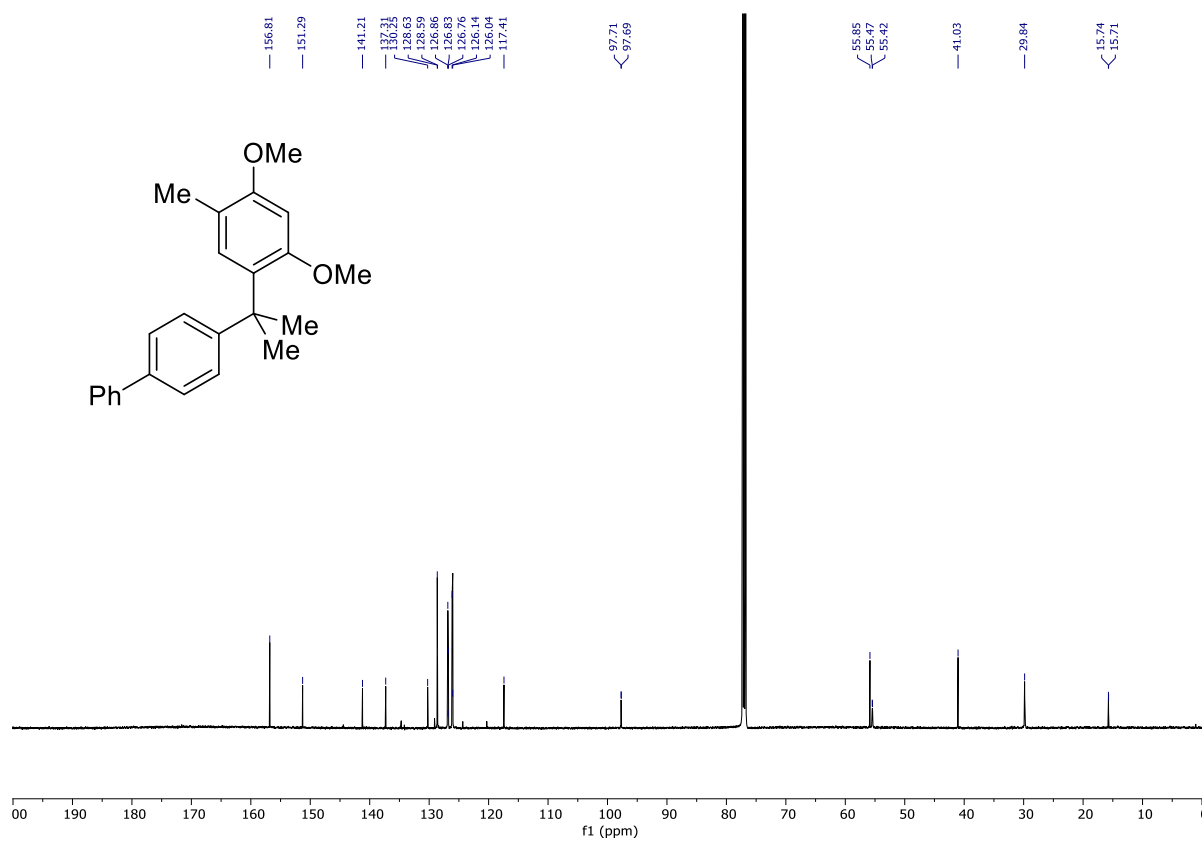

# $^1\text{H}$ NMR (400 MHz, $\text{CDCl}_3$ )

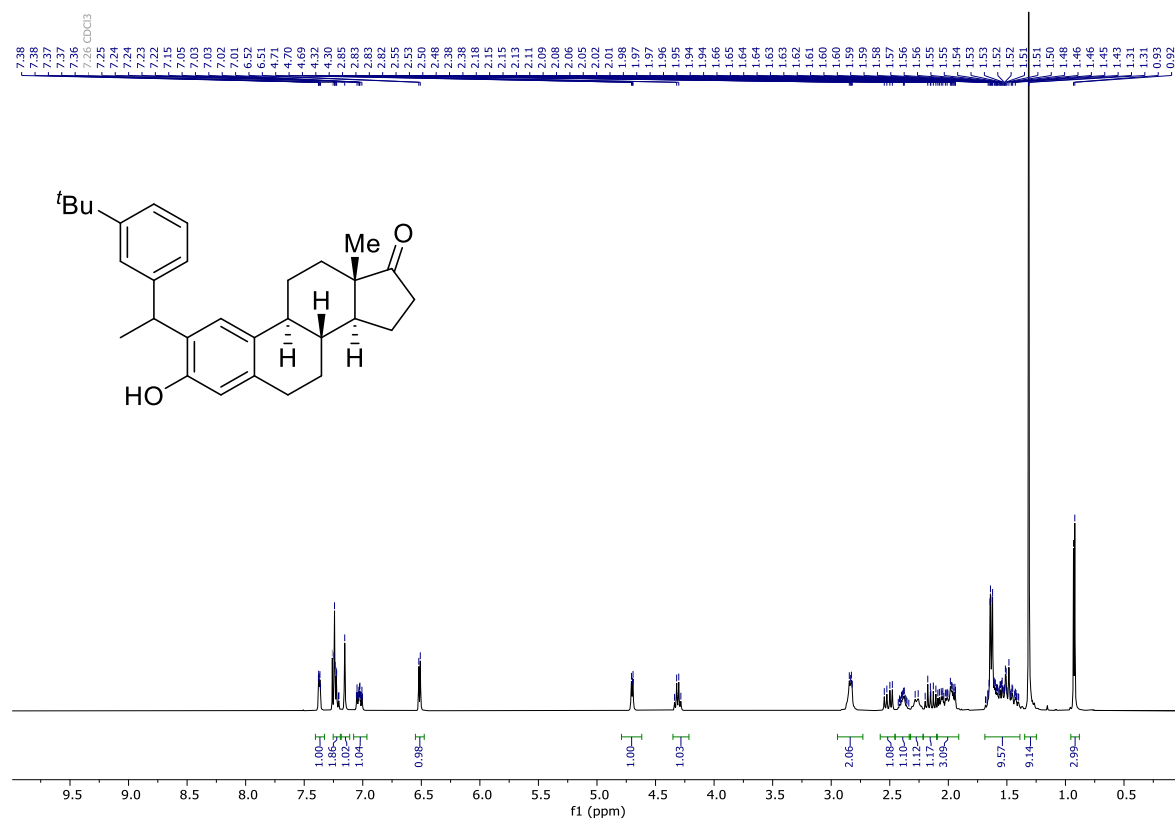

# $^{13}\text{C}$ NMR (126 MHz, $\text{CDCl}_3$ )

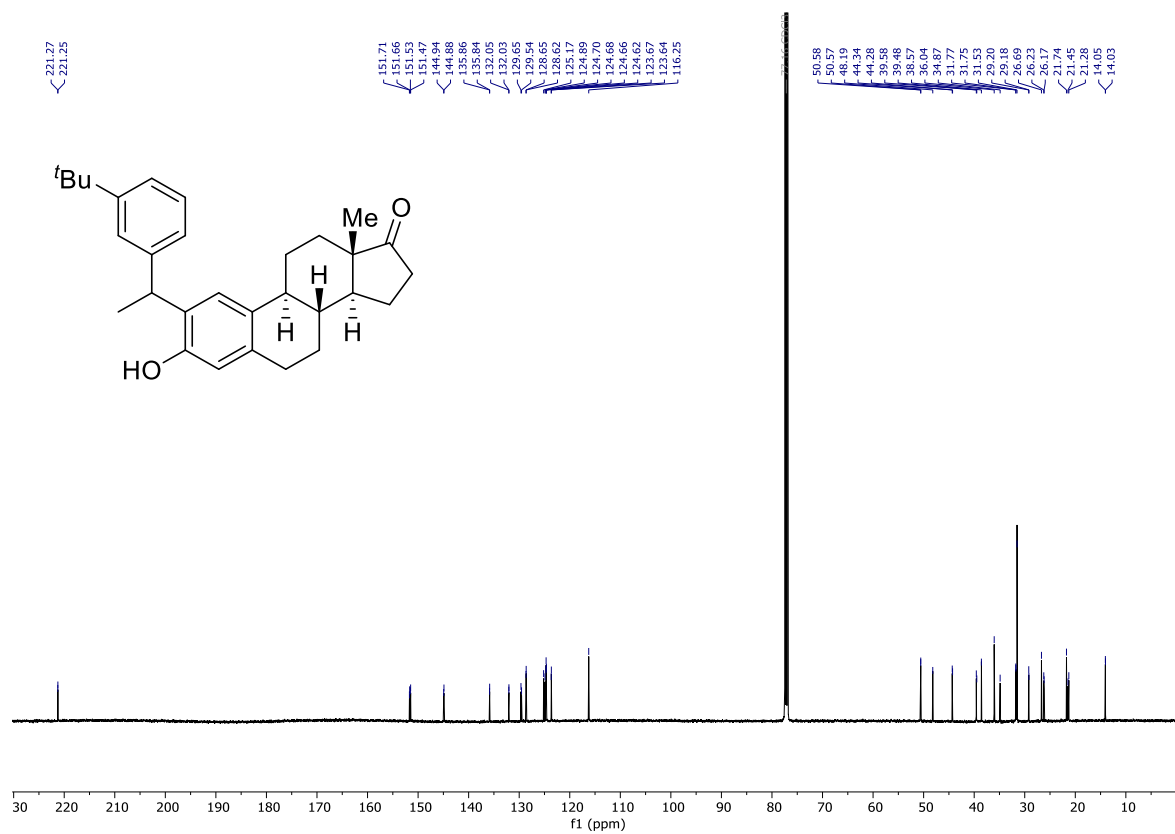

# <sup>1</sup>H NMR (400 MHz, CDCl<sub>3</sub>)

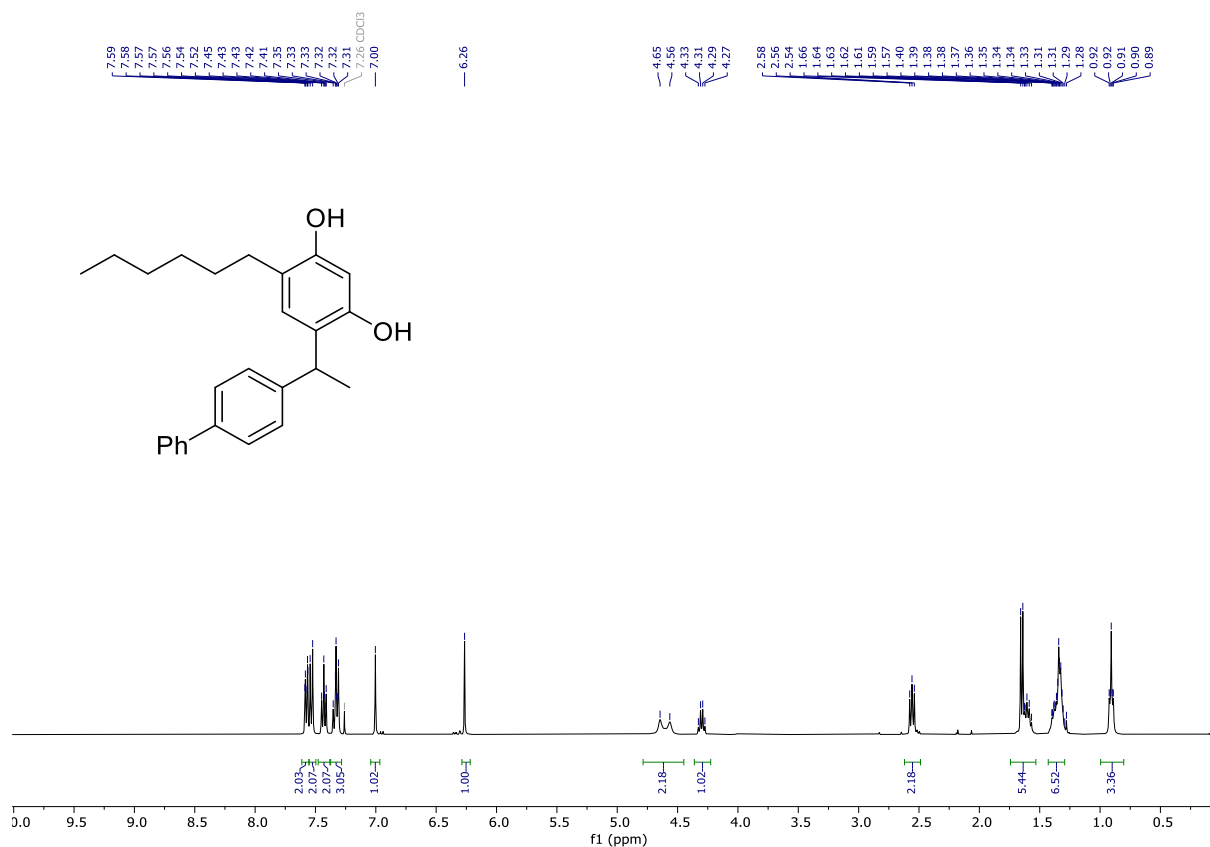

# <sup>13</sup>C NMR (101 MHz, CDCl<sub>3</sub>)

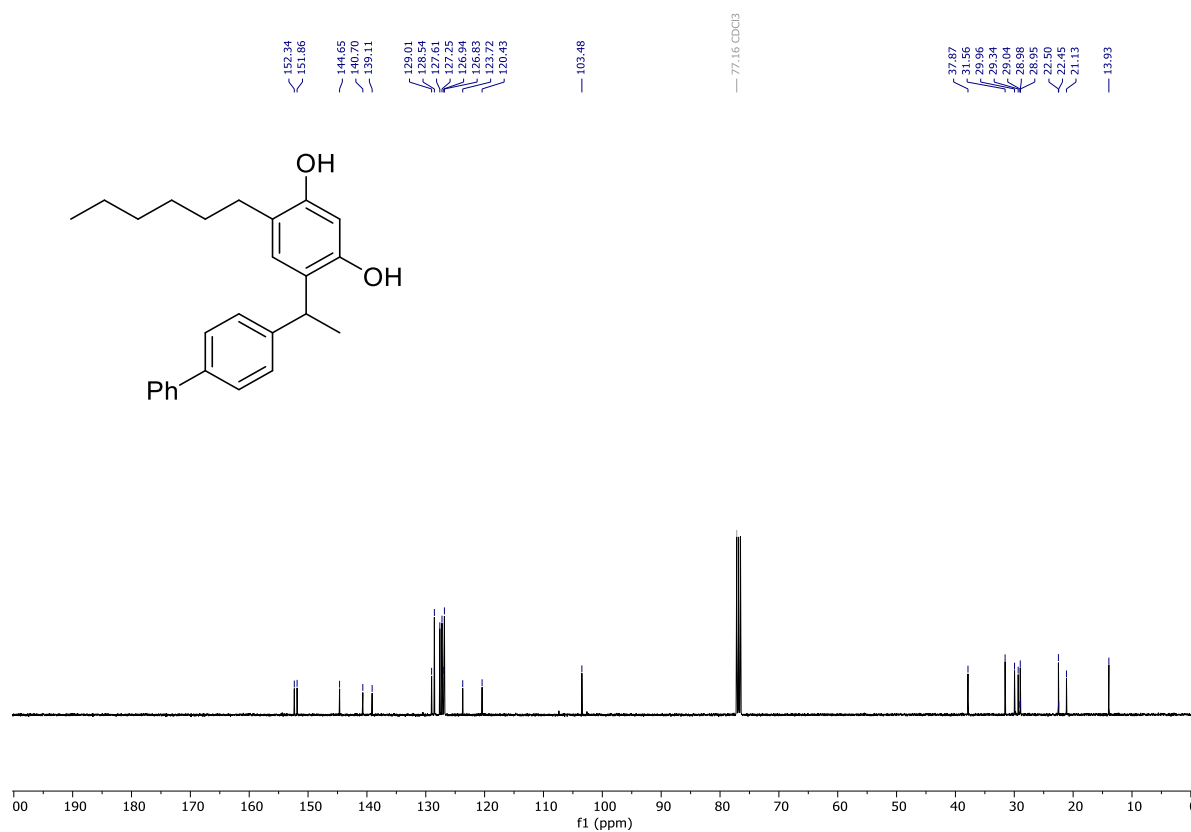

# <sup>1</sup>H NMR (400 MHz, Acetone)

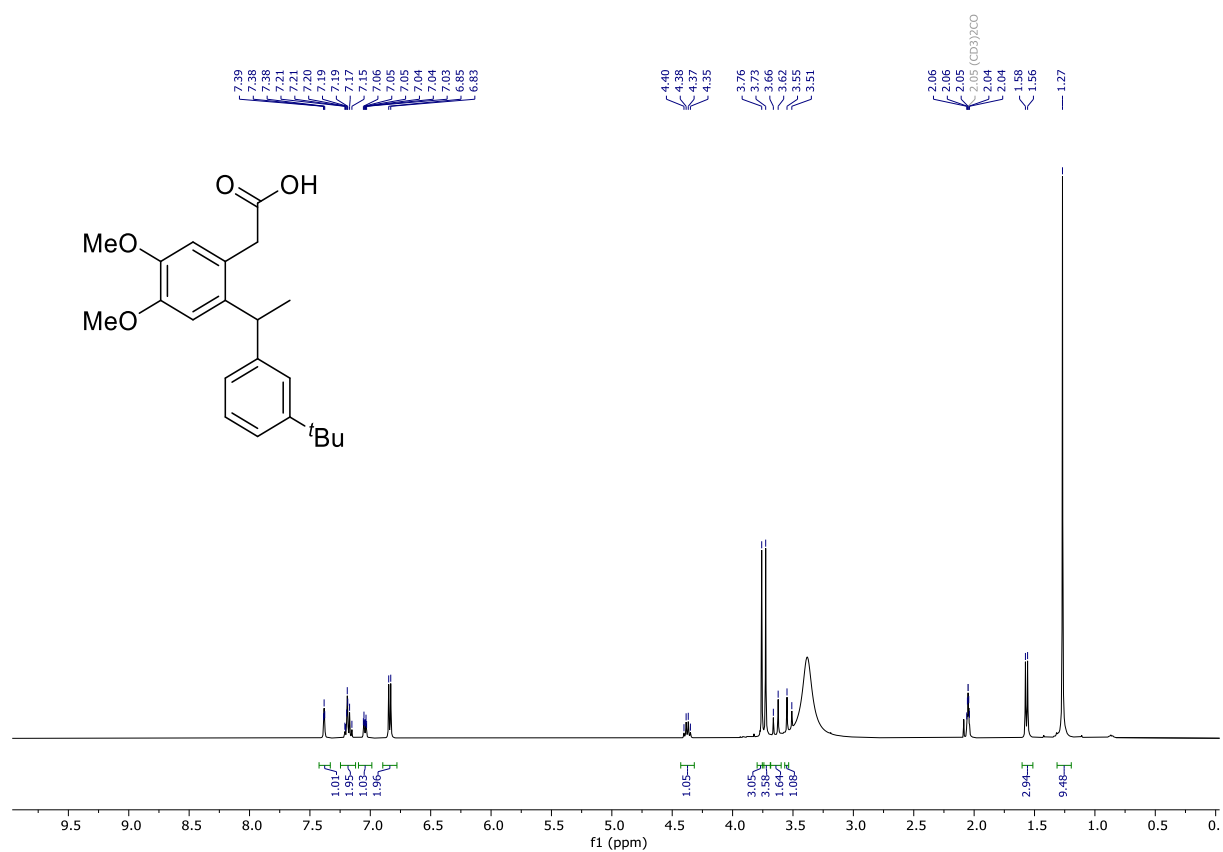

# <sup>13</sup>C NMR (400 MHz, Acetone)

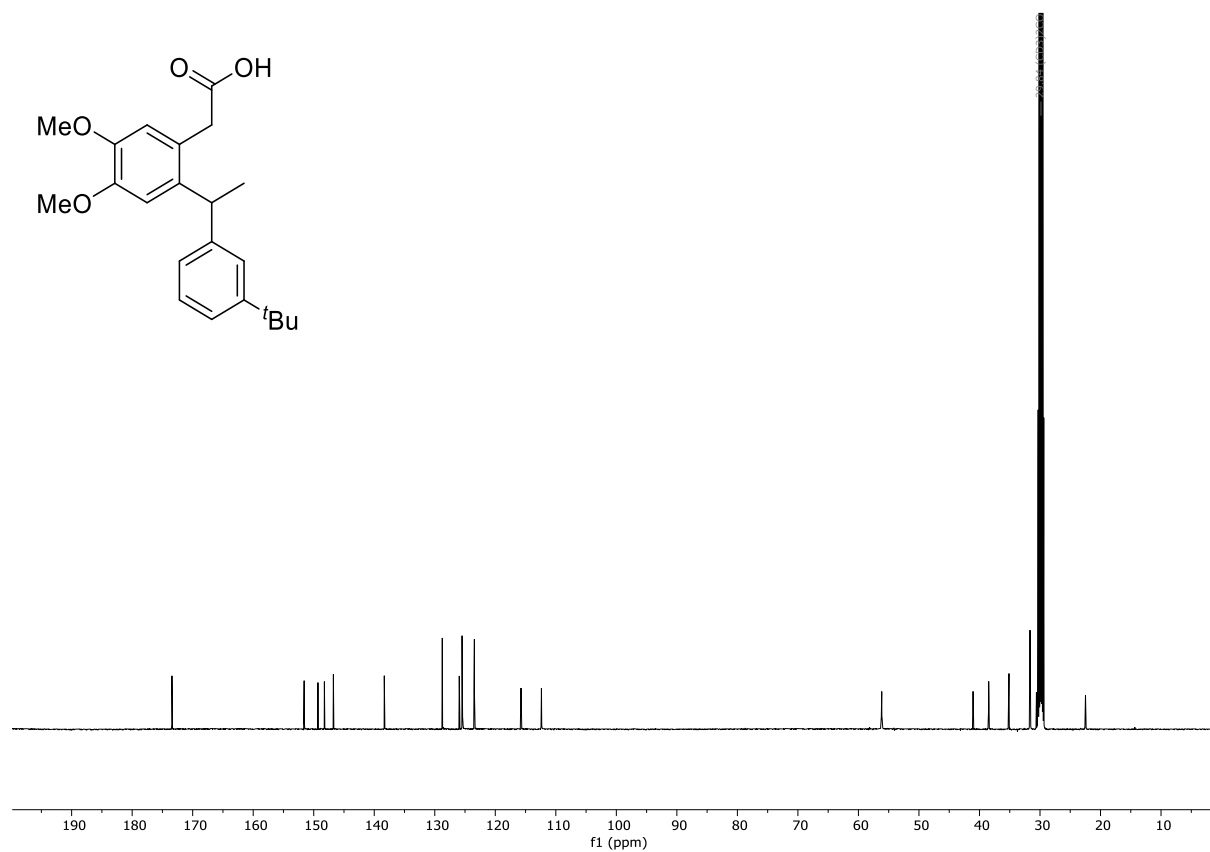

# <sup>1</sup>H NMR (400 MHz, CDCl<sub>3</sub>)

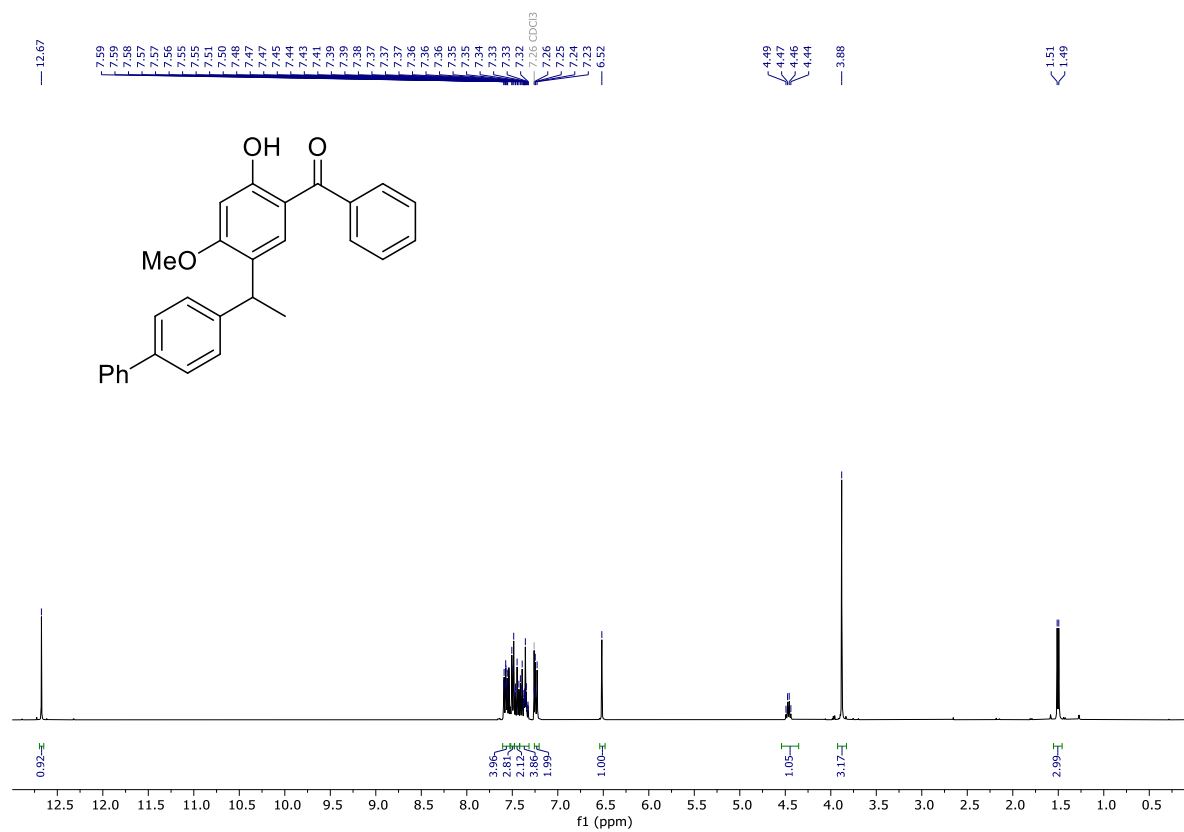

# <sup>13</sup>C NMR (101 MHz, CDCl<sub>3</sub>)

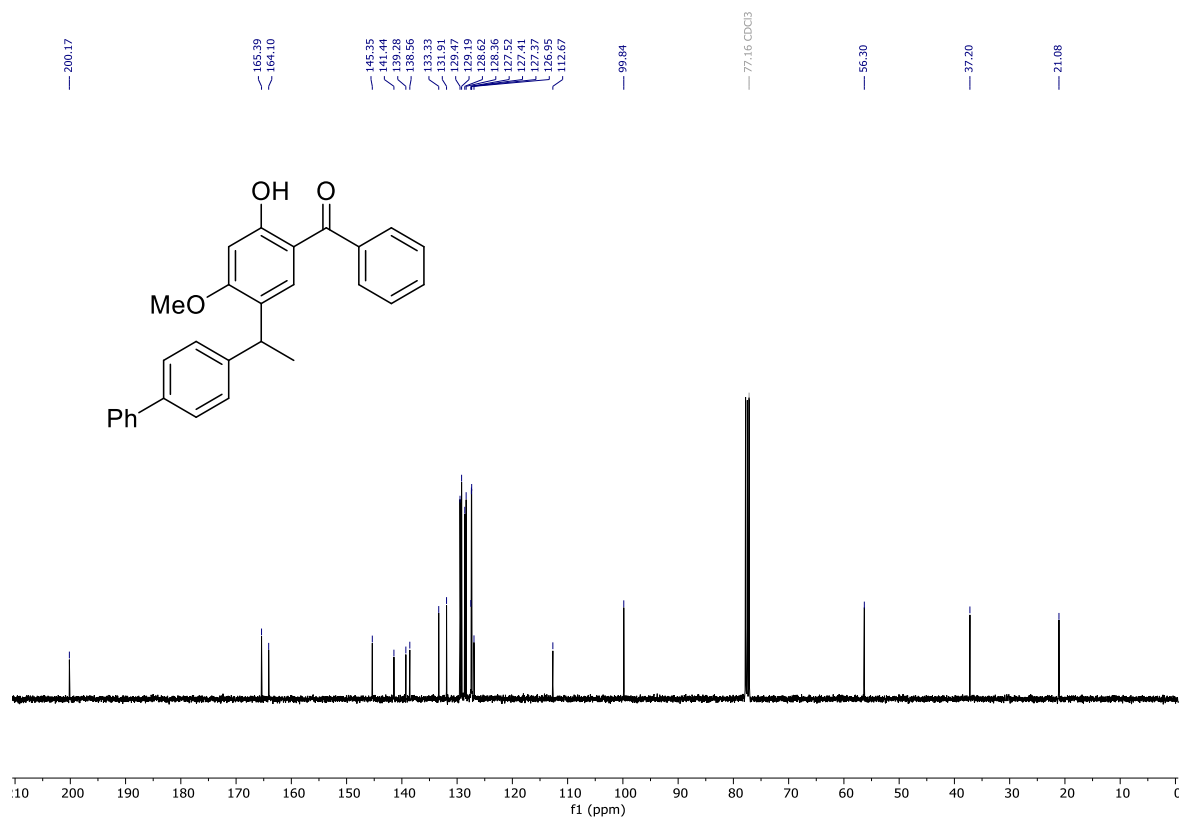

# <sup>1</sup>H NMR (400 MHz, CDCl<sub>3</sub>)

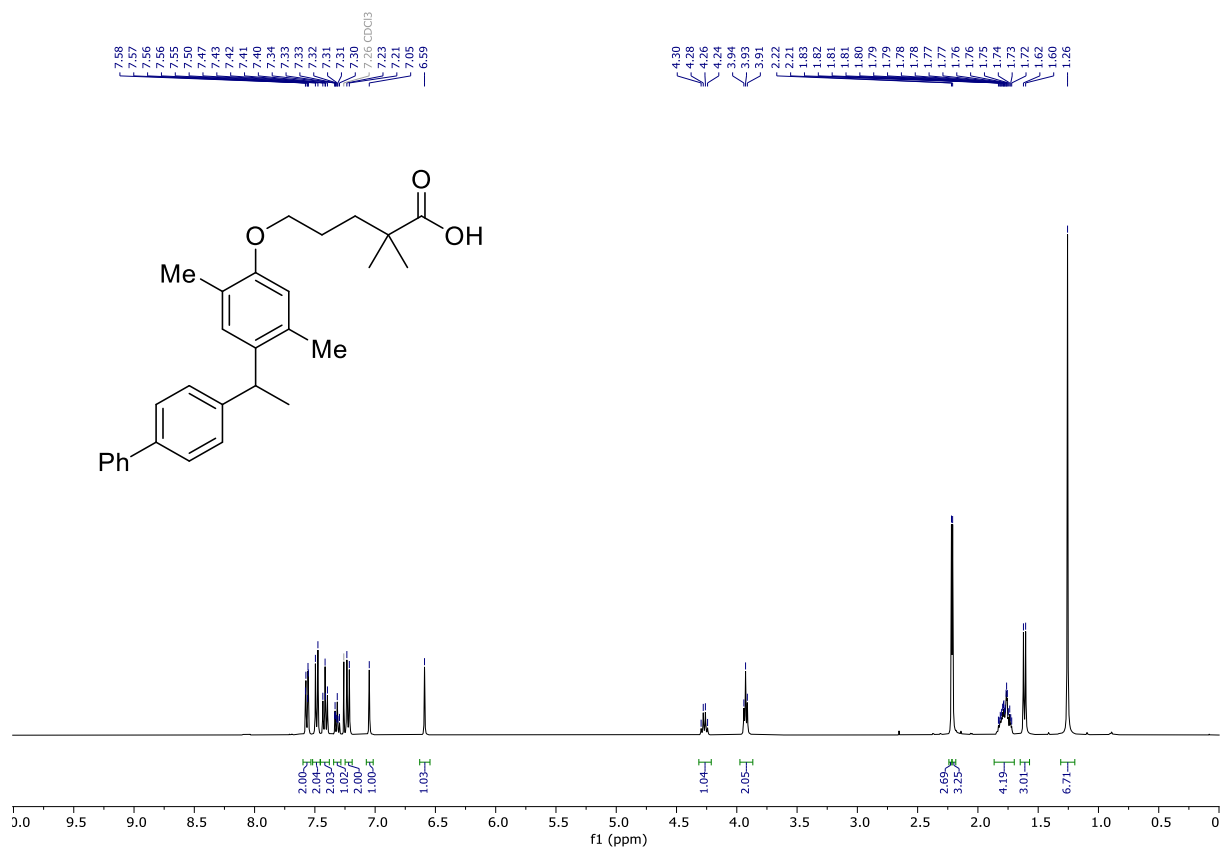

# <sup>13</sup>C NMR (101 MHz, CDCl<sub>3</sub>)

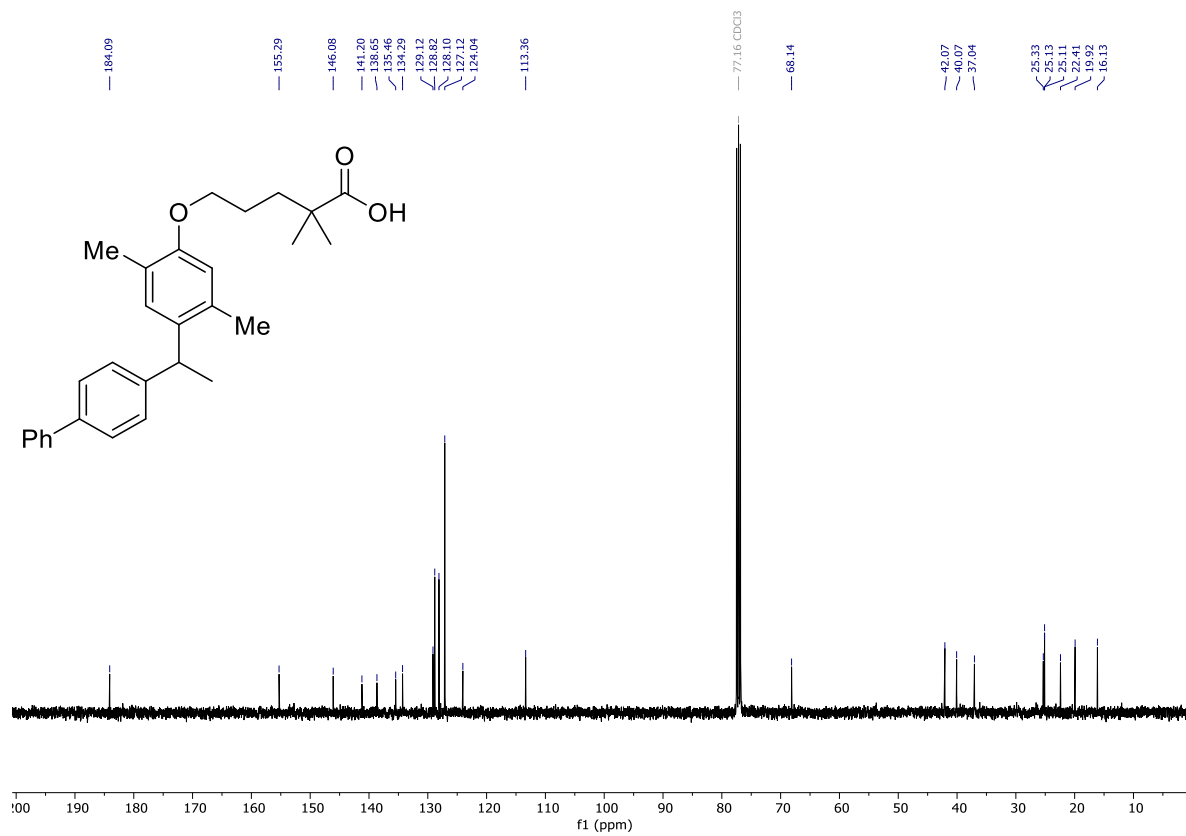

Supplement: d0cc06212j1.pdf [file d0cc06212j1.pdf]
